# Supplementary material
Source: Research Square preprint supplement (doi:10.21203/rs.3.rs-9370187/v1)
Supplement: Supplementary file 1 [file 39a9b2f14f0d3061ca8500b5.docx]

**SUPPLEMENTARY MATERIAL**

**A pipeline for improved 16S rRNA gene-based phylogeny and diversity analyses of Bacteria and Archaea**

Tomeu Viver1, Pere Palmer2, Ralf Westram3, Esteban Bustos-Caparros1,4, Juan Francisco Gago1, Jaime González-Méndez1, Mercè Llabrés2, Wolfgang Ludwig5, Rudolf Amann5, Ramon Rossello-Mora1

1. Marine Microbiology Group, Department of Animal and Microbial Biodiversity, Mediterranean Institute for Advanced Studies (IMEDEA, CSIC-UIB), Esporles, Spain.
2. Department of Mathematics and Computer Science, University of the Balearic Islands, Palma 07122, Spain.
3. Ribocon GmbH, Fahrenheitstraße. 1, D-28359 Bremen, Germany
4. Nordcee, Department of Biology, University of Southern Denmark, 5230 Odense, Denmark
5. Department of Molecular Ecology, Max Planck Institute for Marine Microbiology, Bremen, Germany

**All precalculated data for this table can be found at:** <https://bioinfo.uib.es/ltp/opucheck>

**Supplementary Text Stxt1:** Recommendations for accurate tree reconstructions

For an adequate treeing approach for taxonomic analyses, we recommend the following steps:

1. Align the query sequences using the universal alignment implemented in the LTPlus. If you encountered close relative sequences using blast in public databases that do not appear in the LTPlus, just include them in your query list.
2. Insert the aligned sequences in the preexisting tree that is available in the LTPlus database.
3. Select the closest relative type sequences as well as other reference sequences that may appear in the vicinity of the query sequences.
4. Select only high-quality sequences covering the almost complete gene stretch for the treeing approach. The non-qualified sequences should not be used for *de novo* reconstructions.
5. With the selection of sequences, we strongly recommend generating multiple trees with different algorithms. Our major recommendation is to always use the filters 'termini' and 'gap_q5_95_08may24', and for all conservational filter combinations in independent trees using both -parsimony and FastTree algorithms independently.
6. Generate your final tree using the ARB consensus tree tool.
7. Add, using the ARB-parsimony tool all sequences ranked as low quality into your calculated tree. This tool conserves the topology and places the query sequences in its best position in accordance with the Parsimony algorithm.
8. In case of dubious treeing observations, modify the dataset by removing bad sequences, balancing the number of sequences in the independent different branches and evaluate the use of different conservational filters for a stable topology.

| **Supplementary Figure** **SF1: Examples of aligned metagenomic reads:** The figure shows aligned reads within the universal alignment showing distinct positions in the 16S rRNA gene stretch. Highlighted in yellow are the full-length reference sequences with which the different reads affiliate. In Bustos-Caparrós et al., 2023, the read length mean was 136± 22 nucleotides and the median 148 nucleotides.  **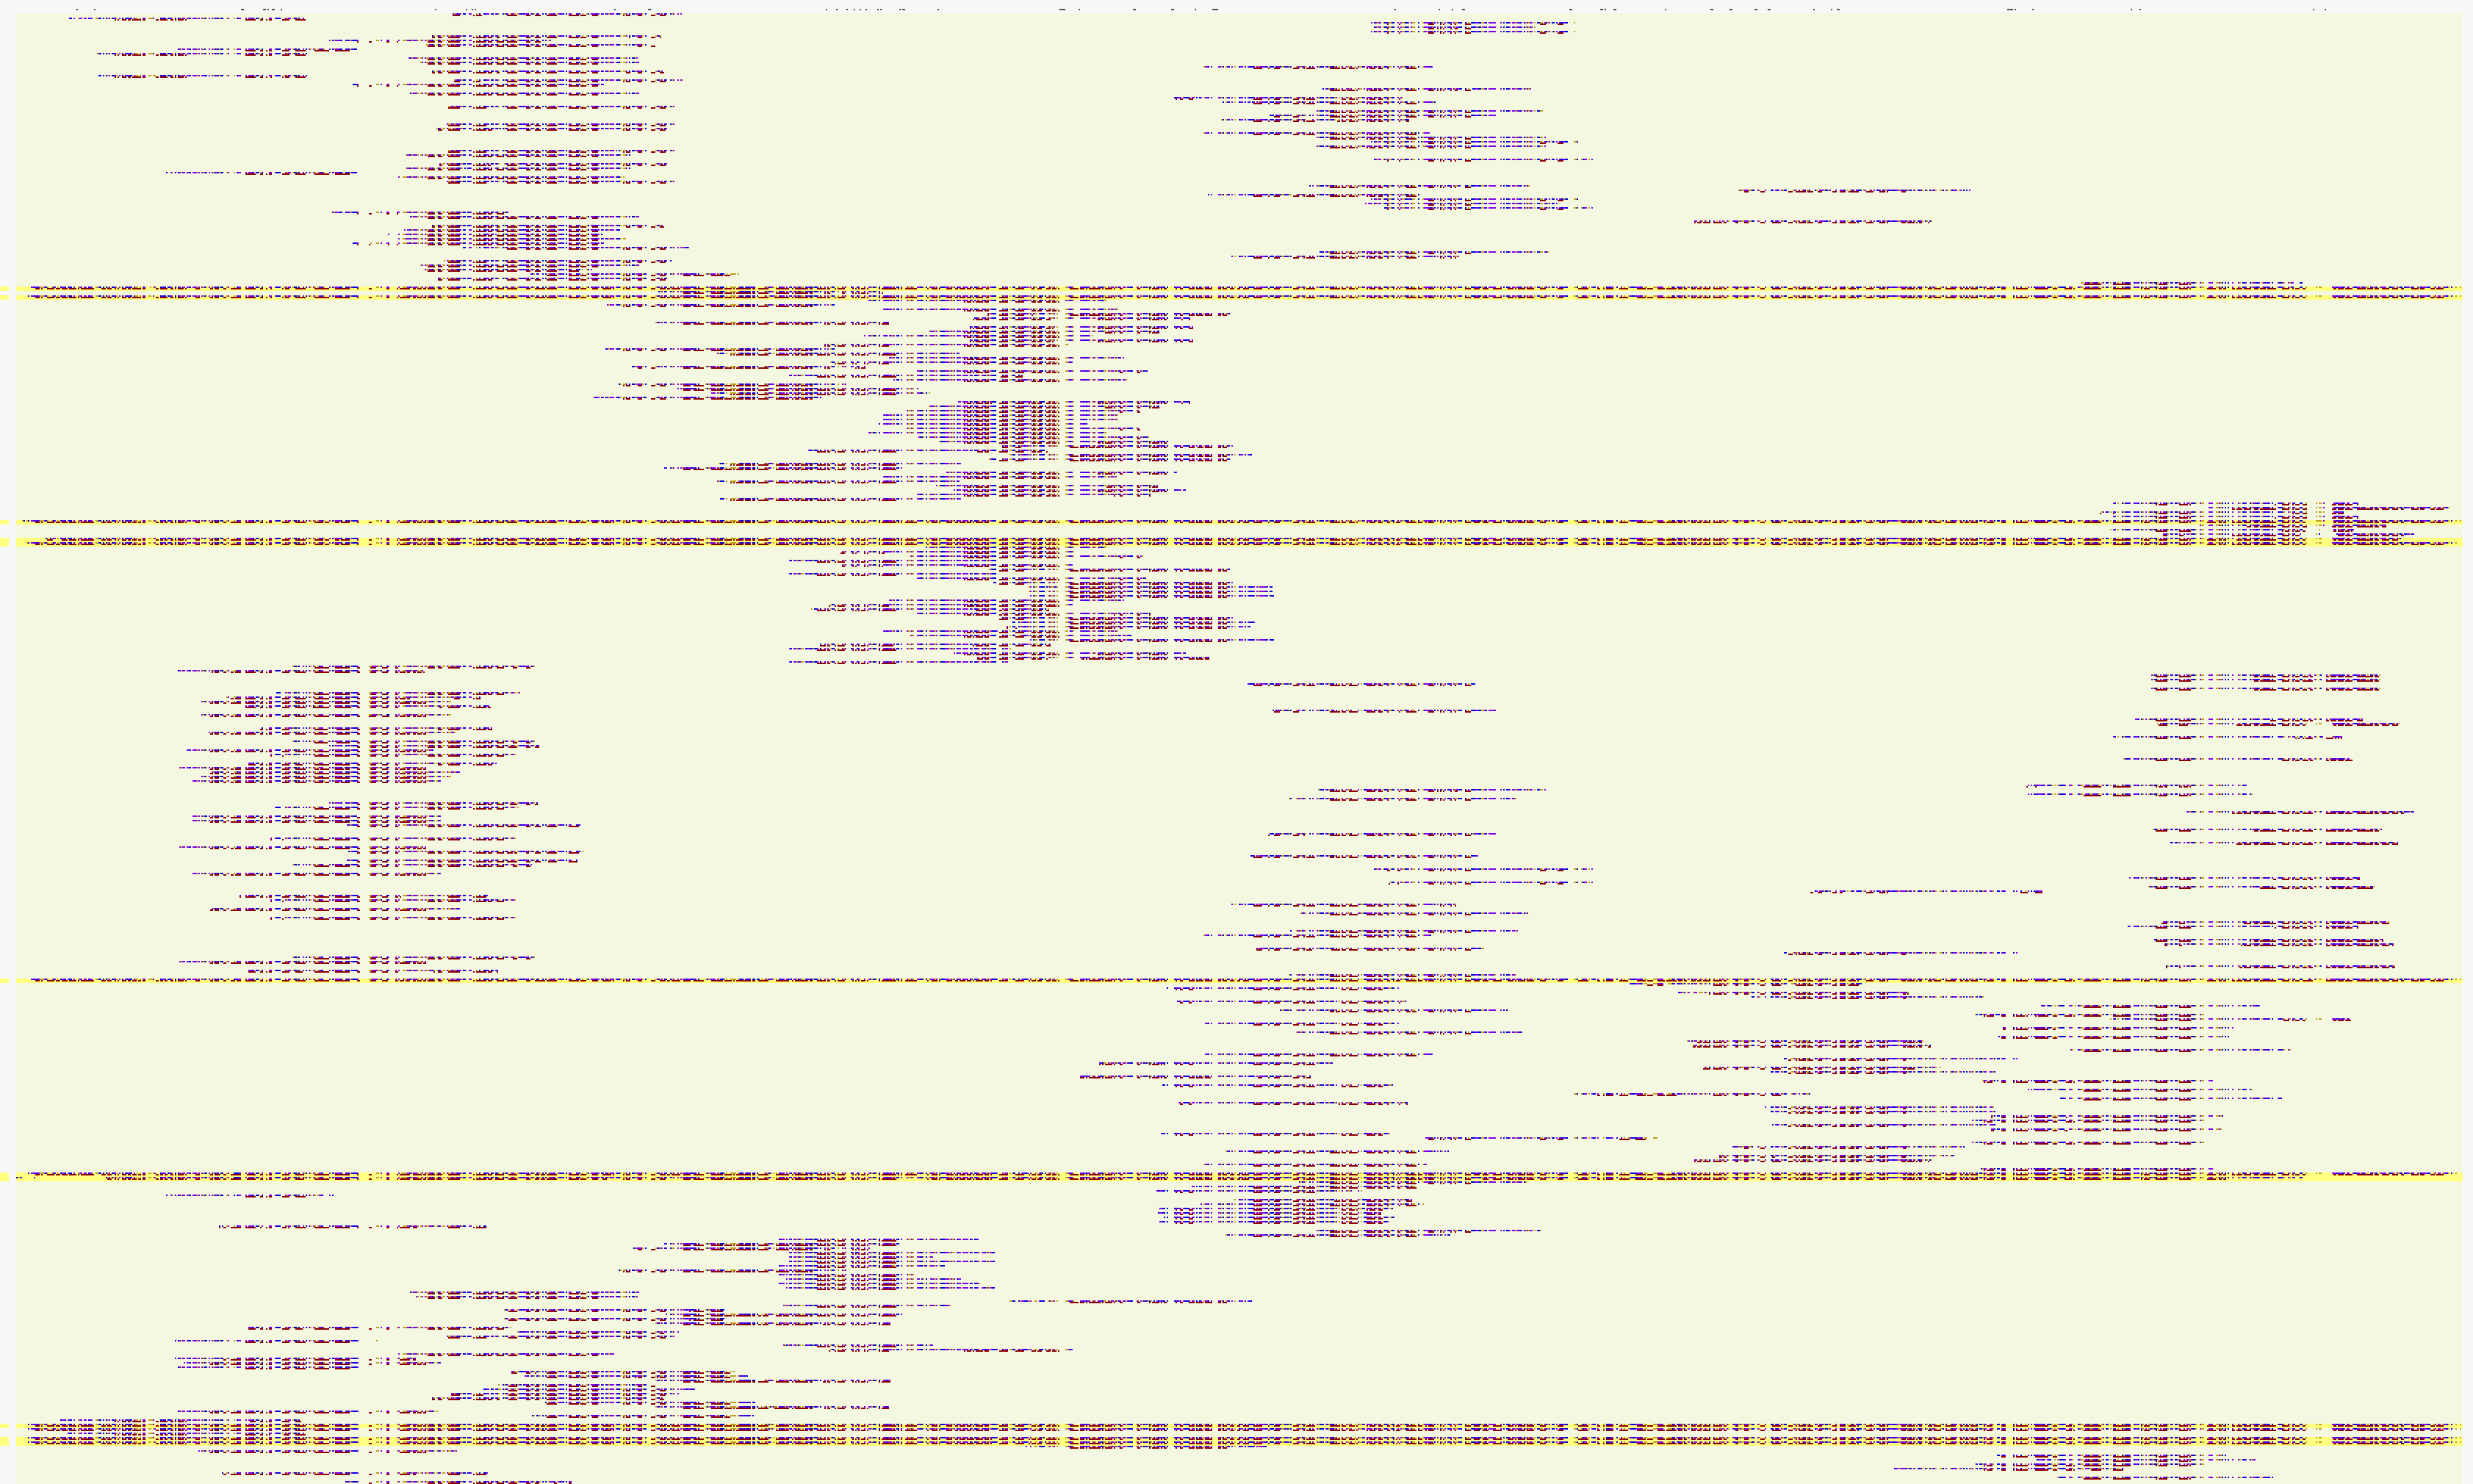** |
| --- |

| Supplementary Table ST1: statistics of kept and discarded OTU, ASV o metagenomic read sequences due to their long branches or ungrouped nature from published and unpublished data (part of the data collection of the IMEDEA). The last column of discarded OTUs is calculated by removing the eukaryote identified reads or amplicons. | | | | | | | |
| --- | --- | --- | --- | --- | --- | --- | --- |
|  | **Platform** | **Total** | **Kept** | **Discarded** | **Discarded %** | **Euk** | **Euk %** |
| Mice gut  (Pomar et al., 2023) | Illumina | 7780 | 7620 | 165 | 2.12 | 8 | 0.10 |
| Fish gut  (Viver et al., 2023) | Illumina | 4959 | 4657 | 308 | 6.21 | 22 | 0.44 |
| Hypersaline sediments  (Font et al., 2021) | Illumina | 6767 | 6259 | 517 | 7.64 | 12 | 0.18 |
| Sponge microbiome  (Glasl et al.,M 2024) | Illumina | 514 | 450 | 66 | 12.84 | 10 | 1.95 |
| Stalagmite  (Unpublished) | Illumina | 4382 | 4113 | 269 | 6.14 | 2 | 0.05 |
| Brines  (Bustos-Caparros, unpublished) | Illumina | 1506 | 1403 | 105 | 6.97 | 3 | 0.20 |
| Arctic samples  (Unpublished) | Illumina | 6303 | 5910 | 396 | 6.28 | 7 | 0.11 |
| Brines  (Liebana et al., unpublished) | Illumina | 2812 | 2705 | 107 | 3.81 | 0 | 0.00 |
| Sandy sediments  (Heritier-Robins et al., 2021) | Illumina | 4094 | 3536 | 558 | 13.63 | 0 | 0.00 |
| Helgoland Sand  (Miksch et al., 2021) | Illumina | 4999 | 4982 | 17 | 0.34 | 0 | 0.00 |
| Svalbard Sand  (Miksch et al., 2021) | Illumina | 4985 | 4933 | 56 | 1.12 | 6 | 0.12 |
| Marine sediments and sea cucumber gut microbiomes  (Maritan et al., 2025) | Illumina  (7K A subs) | 7000 | 5630 | 1416 | 20.23 | 175 | 2.50 |
| Marine sediments and sea cucumber gut microbiomes  (Maritan et al., 2025) | Illumina  (7K B subs) | 7000 | 5586 | 1473 | 21.04 | 172 | 2.46 |
| Rabbit gut  (Biada et al., 2025) | Illumina | 1456 | 1437 | 19 | 1.30 | 0 | 0.00 |
| Epilithic biofilms  (Anderson et al., 2025) | Illumina | 5871 | 5182 | 697 | 11.87 | 31 | 0.53 |
| Soil microbiome  (Veselovsky et al., 2025) | Illumina  (7K A subs) | 6942 | 6549 | 393 | 5.66 | 0 | 0.00 |
| Soil microbiome  (Veselovsky et al., 2025) | Illumina  (7K B subs) | 6852 | 6428 | 424 | 6.19 | 0 | 0.00 |
| Rabbit gut  (Biada et al., 2025) | PacBio | 1892 | 1809 | 83 | 4.39 | 0 | 0.00 |
| Epilithic biofilms  (Anderson et al., 2025) | PacBio  (10K A subs) | 10082 | 8986 | 1155 | 11.46 | 94 | 0.93 |
| Epilithic biofilms  (Anderson et al., 2025) | PacBio  (10K B subs) | 10115 | 8860 | 1305 | 12.90 | 86 | 0.85 |
| Poultry litter  (Ivulic et al., 2022) | PacBio | 2172 | 1759 | 414 | 19.06 | 55 | 2.53 |
| Soil microbiome  (Veselovsky et al., 2025) | PacBio  (7K B subs) | 6854 | 5595 | 1711 | 24.96 | 552 | 8.05 |
| Soil microbiome  (Veselovsky et al., 2025) | PacBio  (7K B subs) | 6928 | 5674 | 1737 | 25.07 | 575 | 8.30 |
| Human Gut  (Buetas et al., 2024) | PacBio | 4745 | 4294 | 451 | 9.50 | 1 | 0.02 |
| Rabbit gut  (Biada et al., 2025) | Nanopore | 4147 | 3740 | 407 | 9.81 | 0 | 0.00 |
| Soil microbiome  (Veselovsky et al., 2025) | Nanopore  (7K A subs) | 6840 | 5802 | 1581 | 23.11 | 597 | 8.73 |
| Soil microbiome  (Veselovsky et al., 2025) | Nanopore  (7K B subs) | 6654 | 5652 | 1502 | 22.57 | 570 | 8.57 |
| Gut mock microbiome  (Curry et al., 2022) | Nanopore  (10K A subs) | 9759 | 8134 | 2157 | 22.10 | 622 | 6.37 |
| Gut mock microbiome  (Curry et al., 2022) | Nanopore  (10K B subs) | 9838 | 8330 | 2021 | 20.54 | 611 | 6.21 |
| Gut mock microbiome  (Curry et al., 2022) | Nanopore  (10K C subs) | 9759 | 7883 | 2371 | 24.30 | 619 | 6.34 |
| Gut mock microbiome  (Curry et al., 2022) | Nanopore  (10K D subs) | 9985 | 8226 | 2274 | 22.77 | 606 | 6.07 |
| Gut mock microbiome  (Curry et al., 2022) | Nanopore  (10K E subs) | 9798 | 7855 | 2430 | 24.80 | 602 | 6.14 |
| Hypersaline brines  (Bustos-Caparros et al., 2024) | Metagen. reads | 7968 | 7250 | 754 | 9.46 | 44 | 0.55 |
| Hypersaline brines  (Bustos-Caparros et al., 2024) | Metagen. contigs | 1858 | 1758 | 208 | 11.19 | 128 | 6.89 |
| Hypersaline brines  (Gonzalez-Mendez, unpubl.) | Metagen. reads | 4763 | 4294 | 474 | 9.95 | 6 | 0.13 |
| Hypersaline brines  (Gonzalez-Mendez, unpubl.) | Metagen. contigs | 255 | 234 | 23 | 9.02 | 7 | 2.75 |
| Ground water  (Gago et al.,2024) | Metagen. reads | 17055 | 14762 | 2308 | 13.53 | 30 | 0.18 |
| Ground water  (Gago et al.,2024) | Metagen. contigs | 817 | 565 | 254 | 31.09 | 5 | 0.61 |

**Supplementary Figure SF2:** Examples of good sequences to keep. The figure shows the 5’ end of the aligned amplicons of a selection of sequences that are to be kept for the analysis. In this figure, the number of unpaired bases (having a symbol # under the nucleotide) is low, and in general, the alignment seems adequate. Yet, the alignment of some sequences could be manually improved, but in general, the use of the gap filter would remove some of the wrong placed bases in the homologous sites.


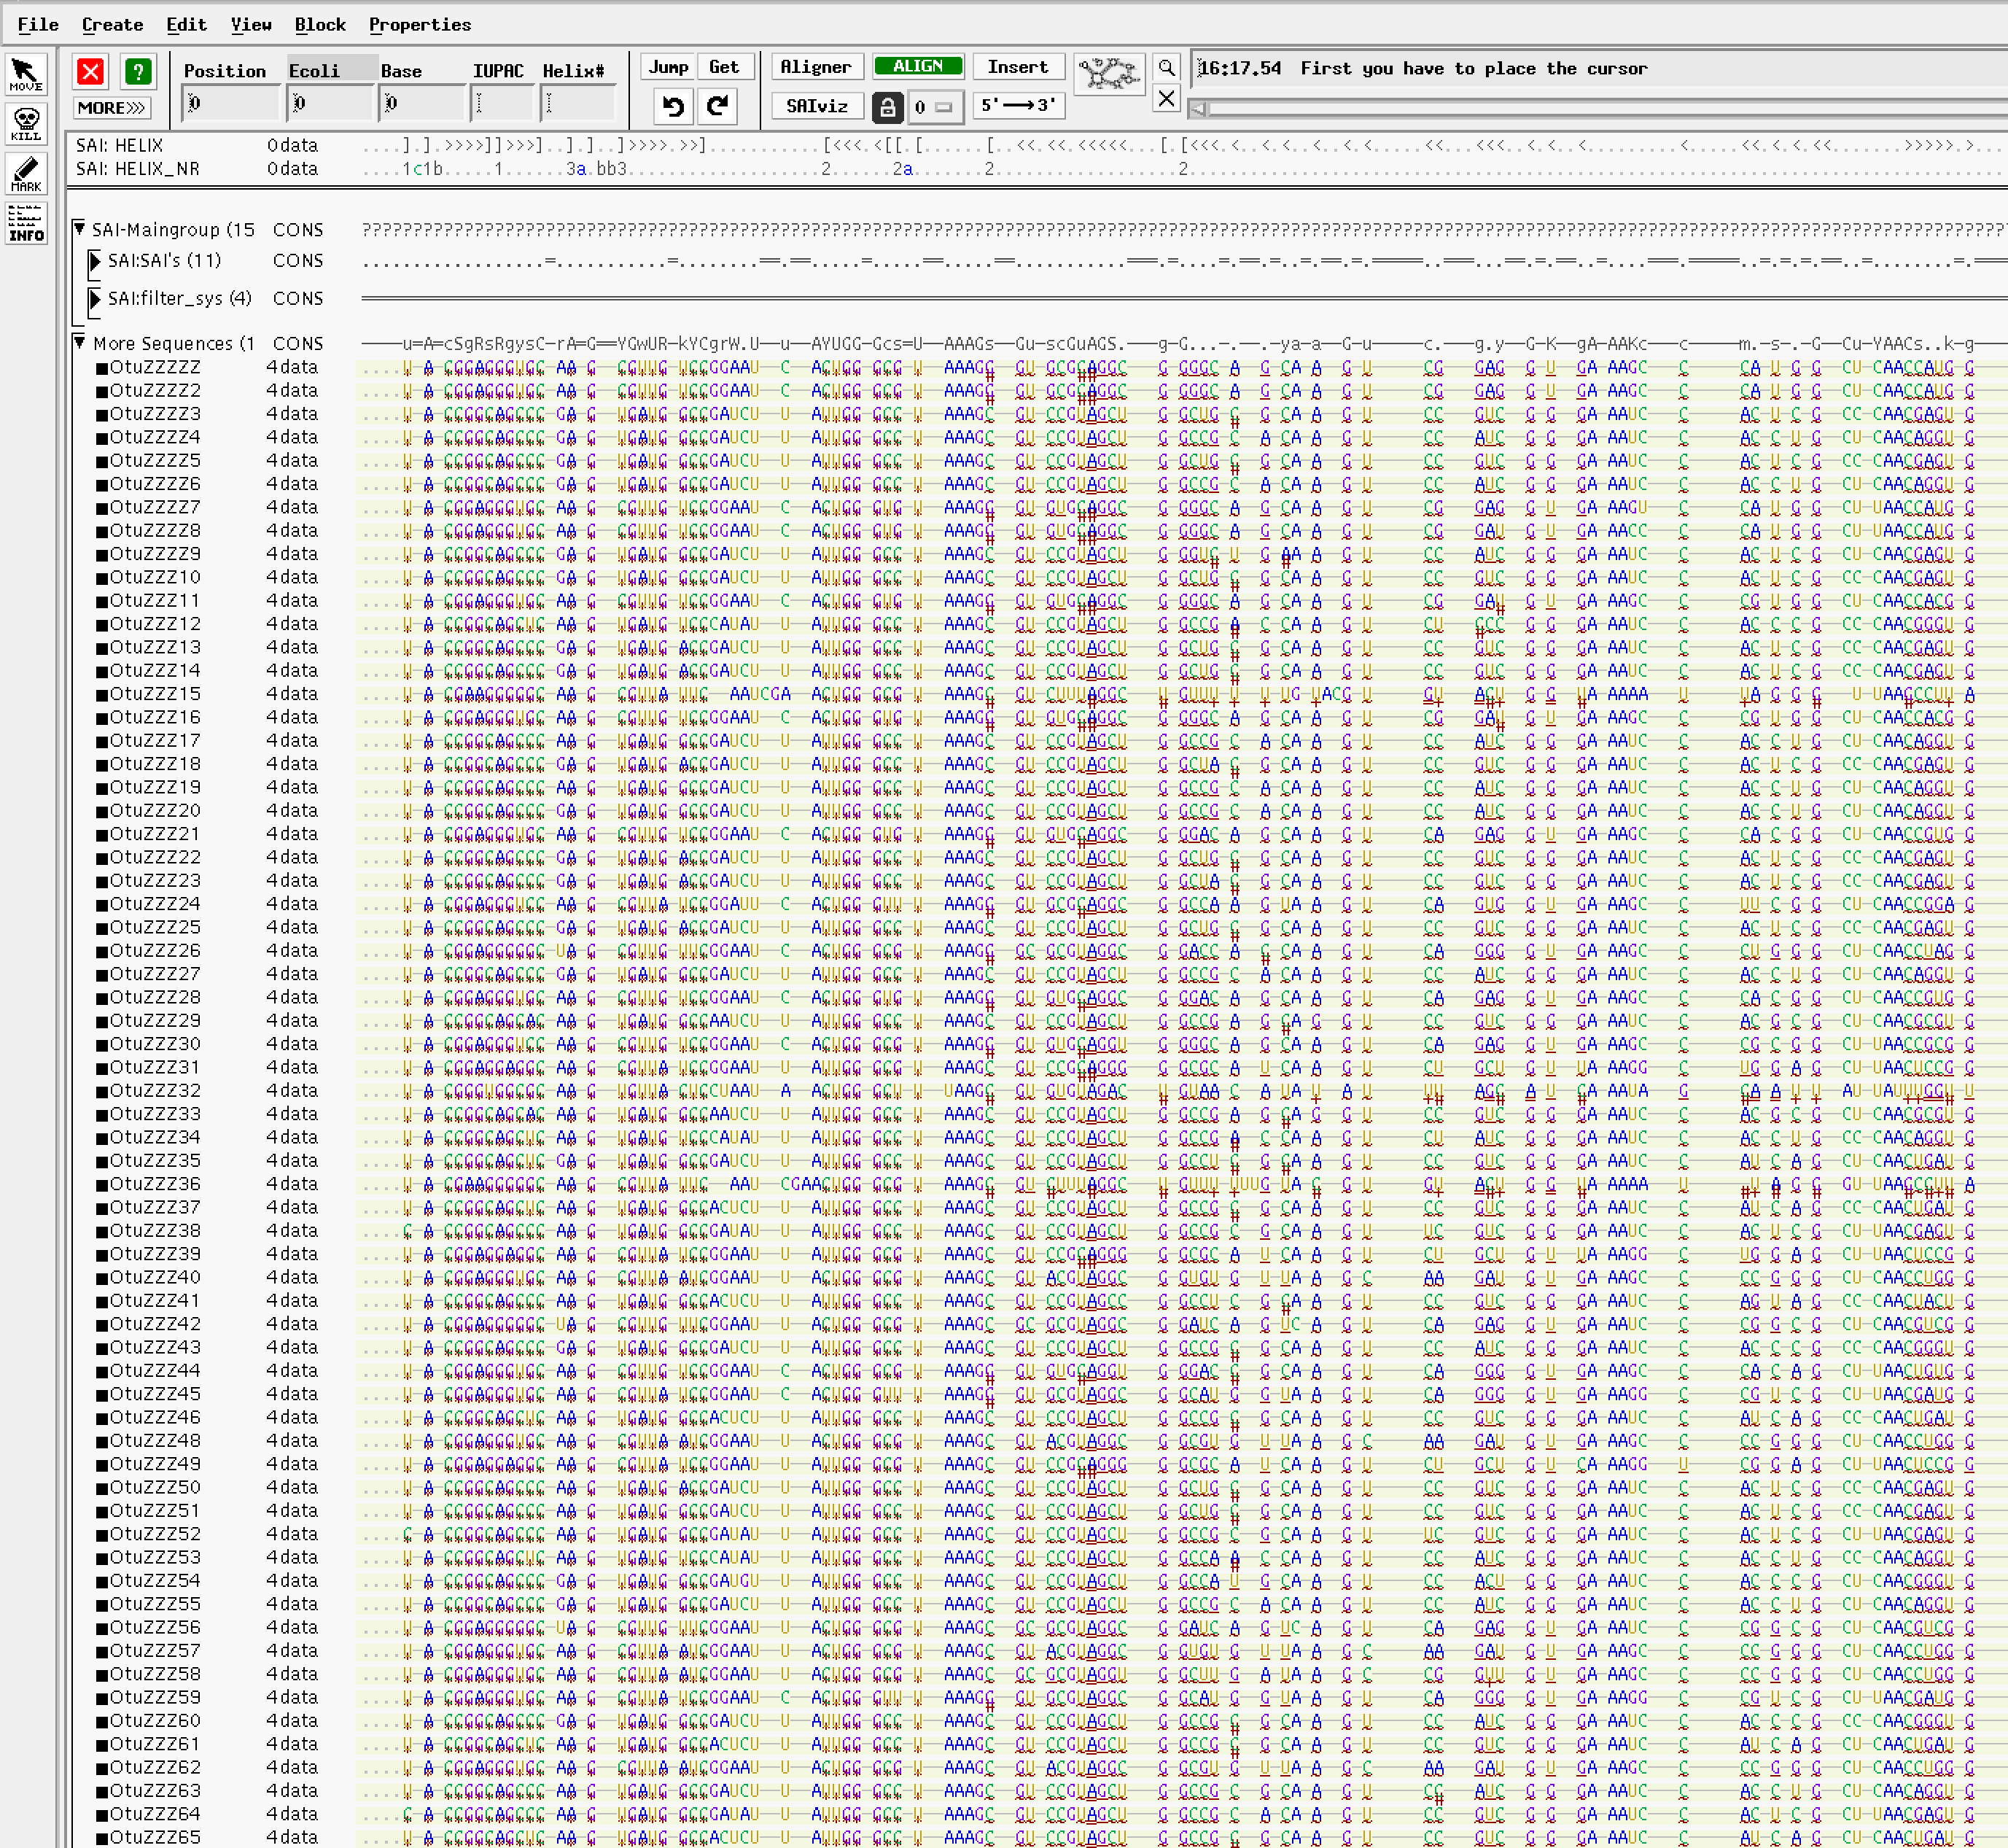


**Supplementary Figure SF3:** Examples of bad sequences to remove. The figure shows the 5’ end of some sequences that were aligned out from the specific correct homologous sites. In general, these unaligned sequences belonged to 18S rRNA genes, not taken into account in the LTPlus.


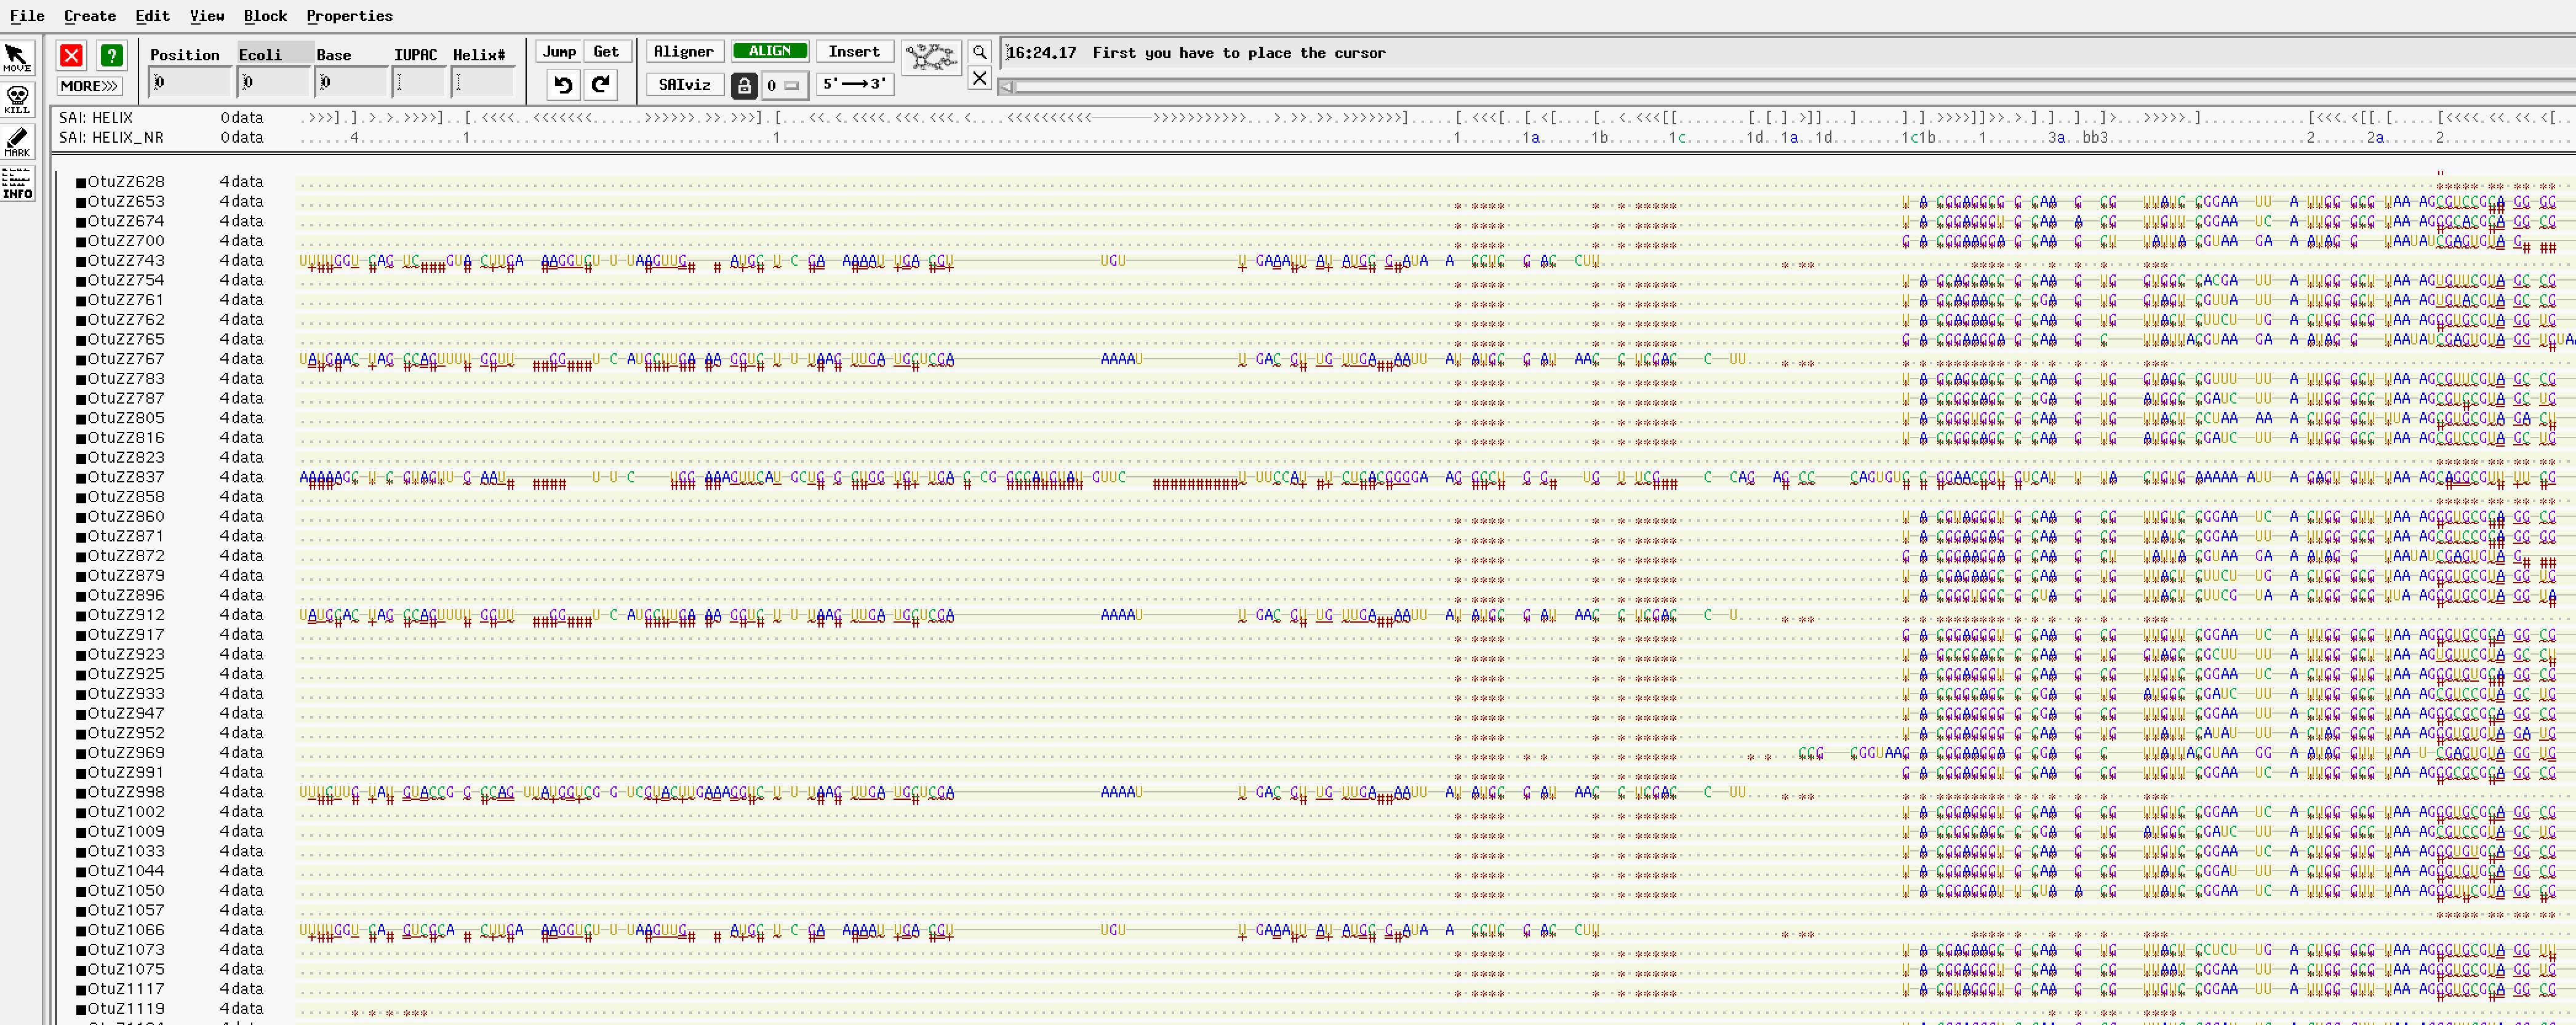


**Supplementary Figure SF4:** Examples of bad sequences to remove. The figure shows the 5’ end of some sequences which alignment shows a large portion of wrong pairing. For the number of mismatches that seem to violate the helix pairing, we believe that may be chimera fruit from the wrong assembly during the sequencing process.


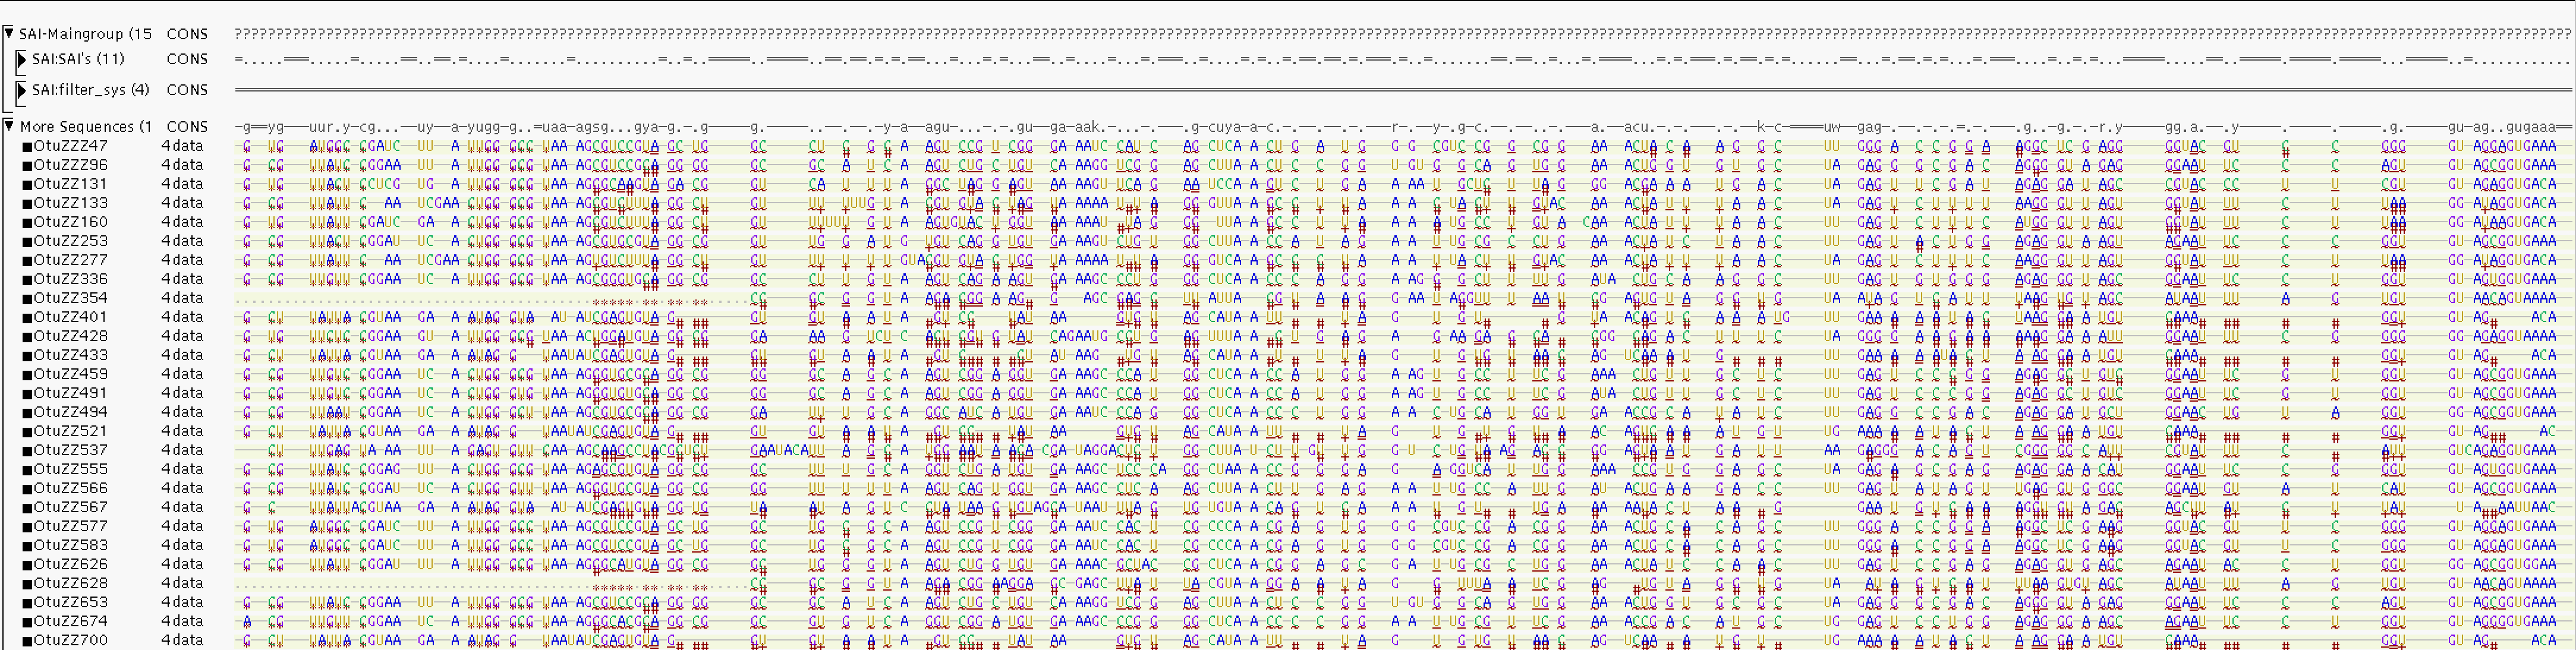


**Supplementary Figure SF5:** Examples of bad sequences to remove and adequate to keep. Sequences aligned out of the Illumina amplified range may not be true 16S rRNA gene sequences. The majority of the sequences align within the amplified stretch and unless the alignments are bad, the sequences are kept. Seq obtained from Maritan et al., 2025, which resulted from the amplification of extracted DNA from sea cucumber gut microbiome.


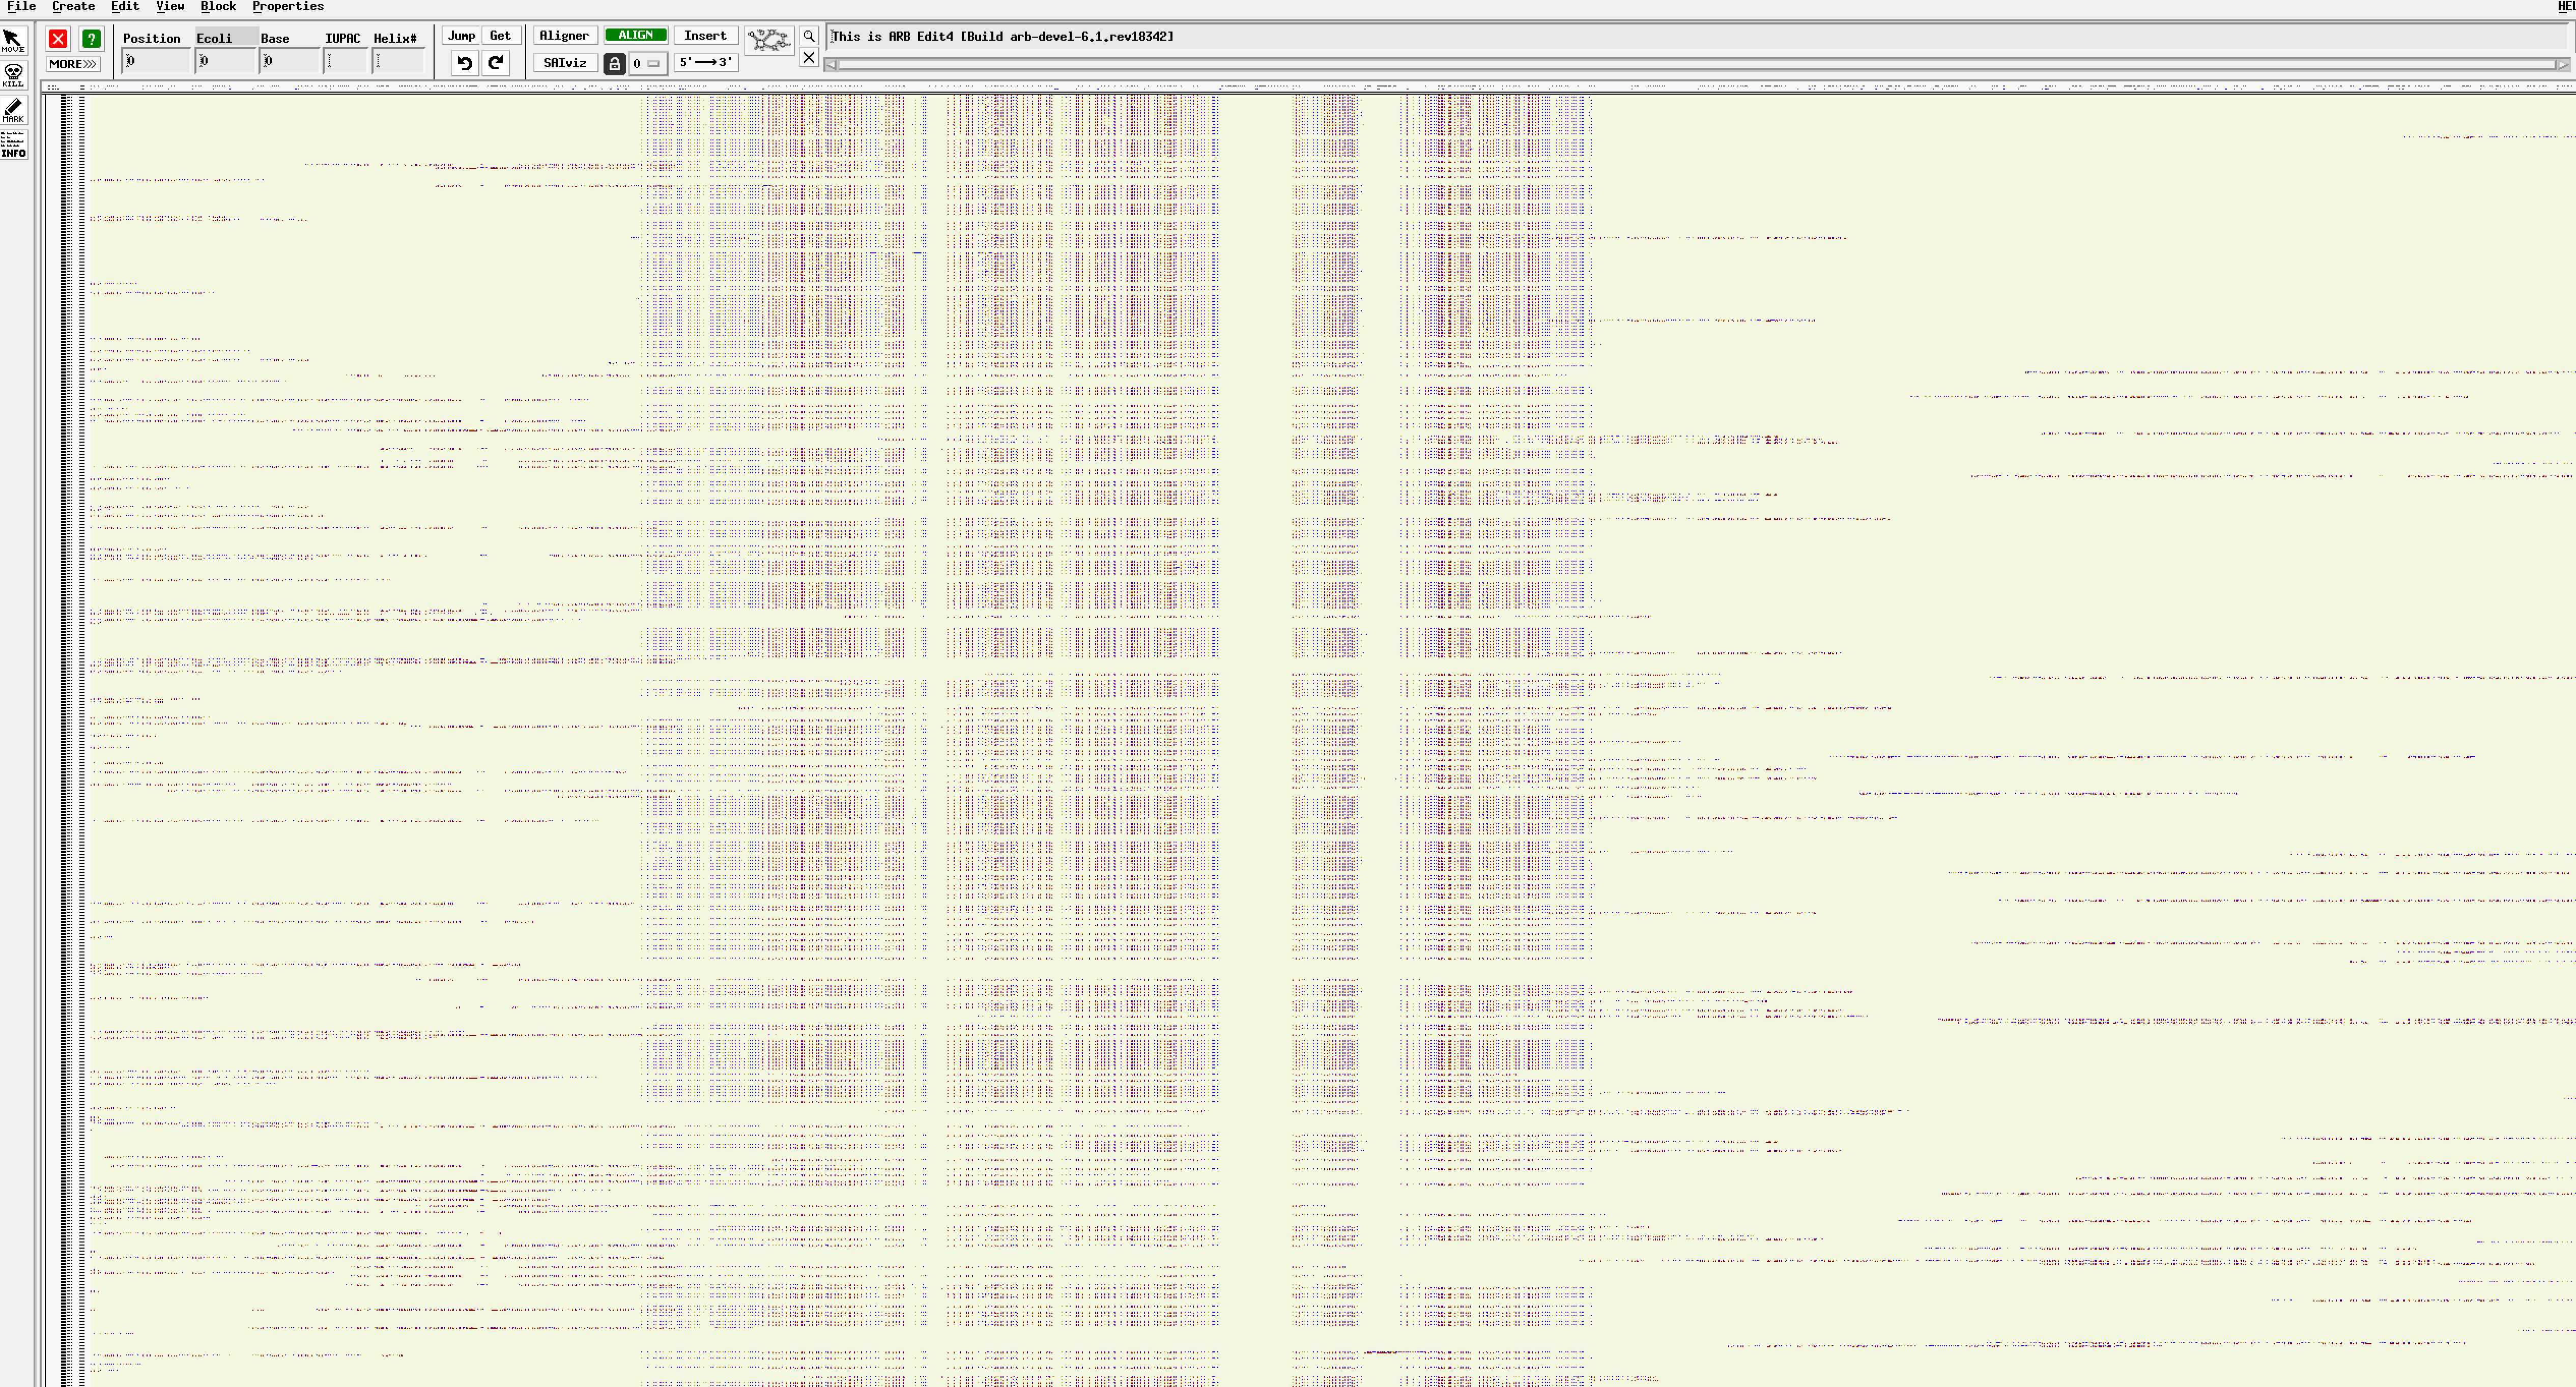


**Supplementary Figure SF6:** Examples of bad sequences to remove and adequate to keep. Sequences aligned out of the Illumina amplified range may not be true 16S rRNA gene sequences. The majority of the sequences align within the amplified stretch and unless the alignments are bad, the sequences are kept. Seq obtained from Glasl et al., 2024, which resulted from the amplification of extracted DNA from sponge microbiome.


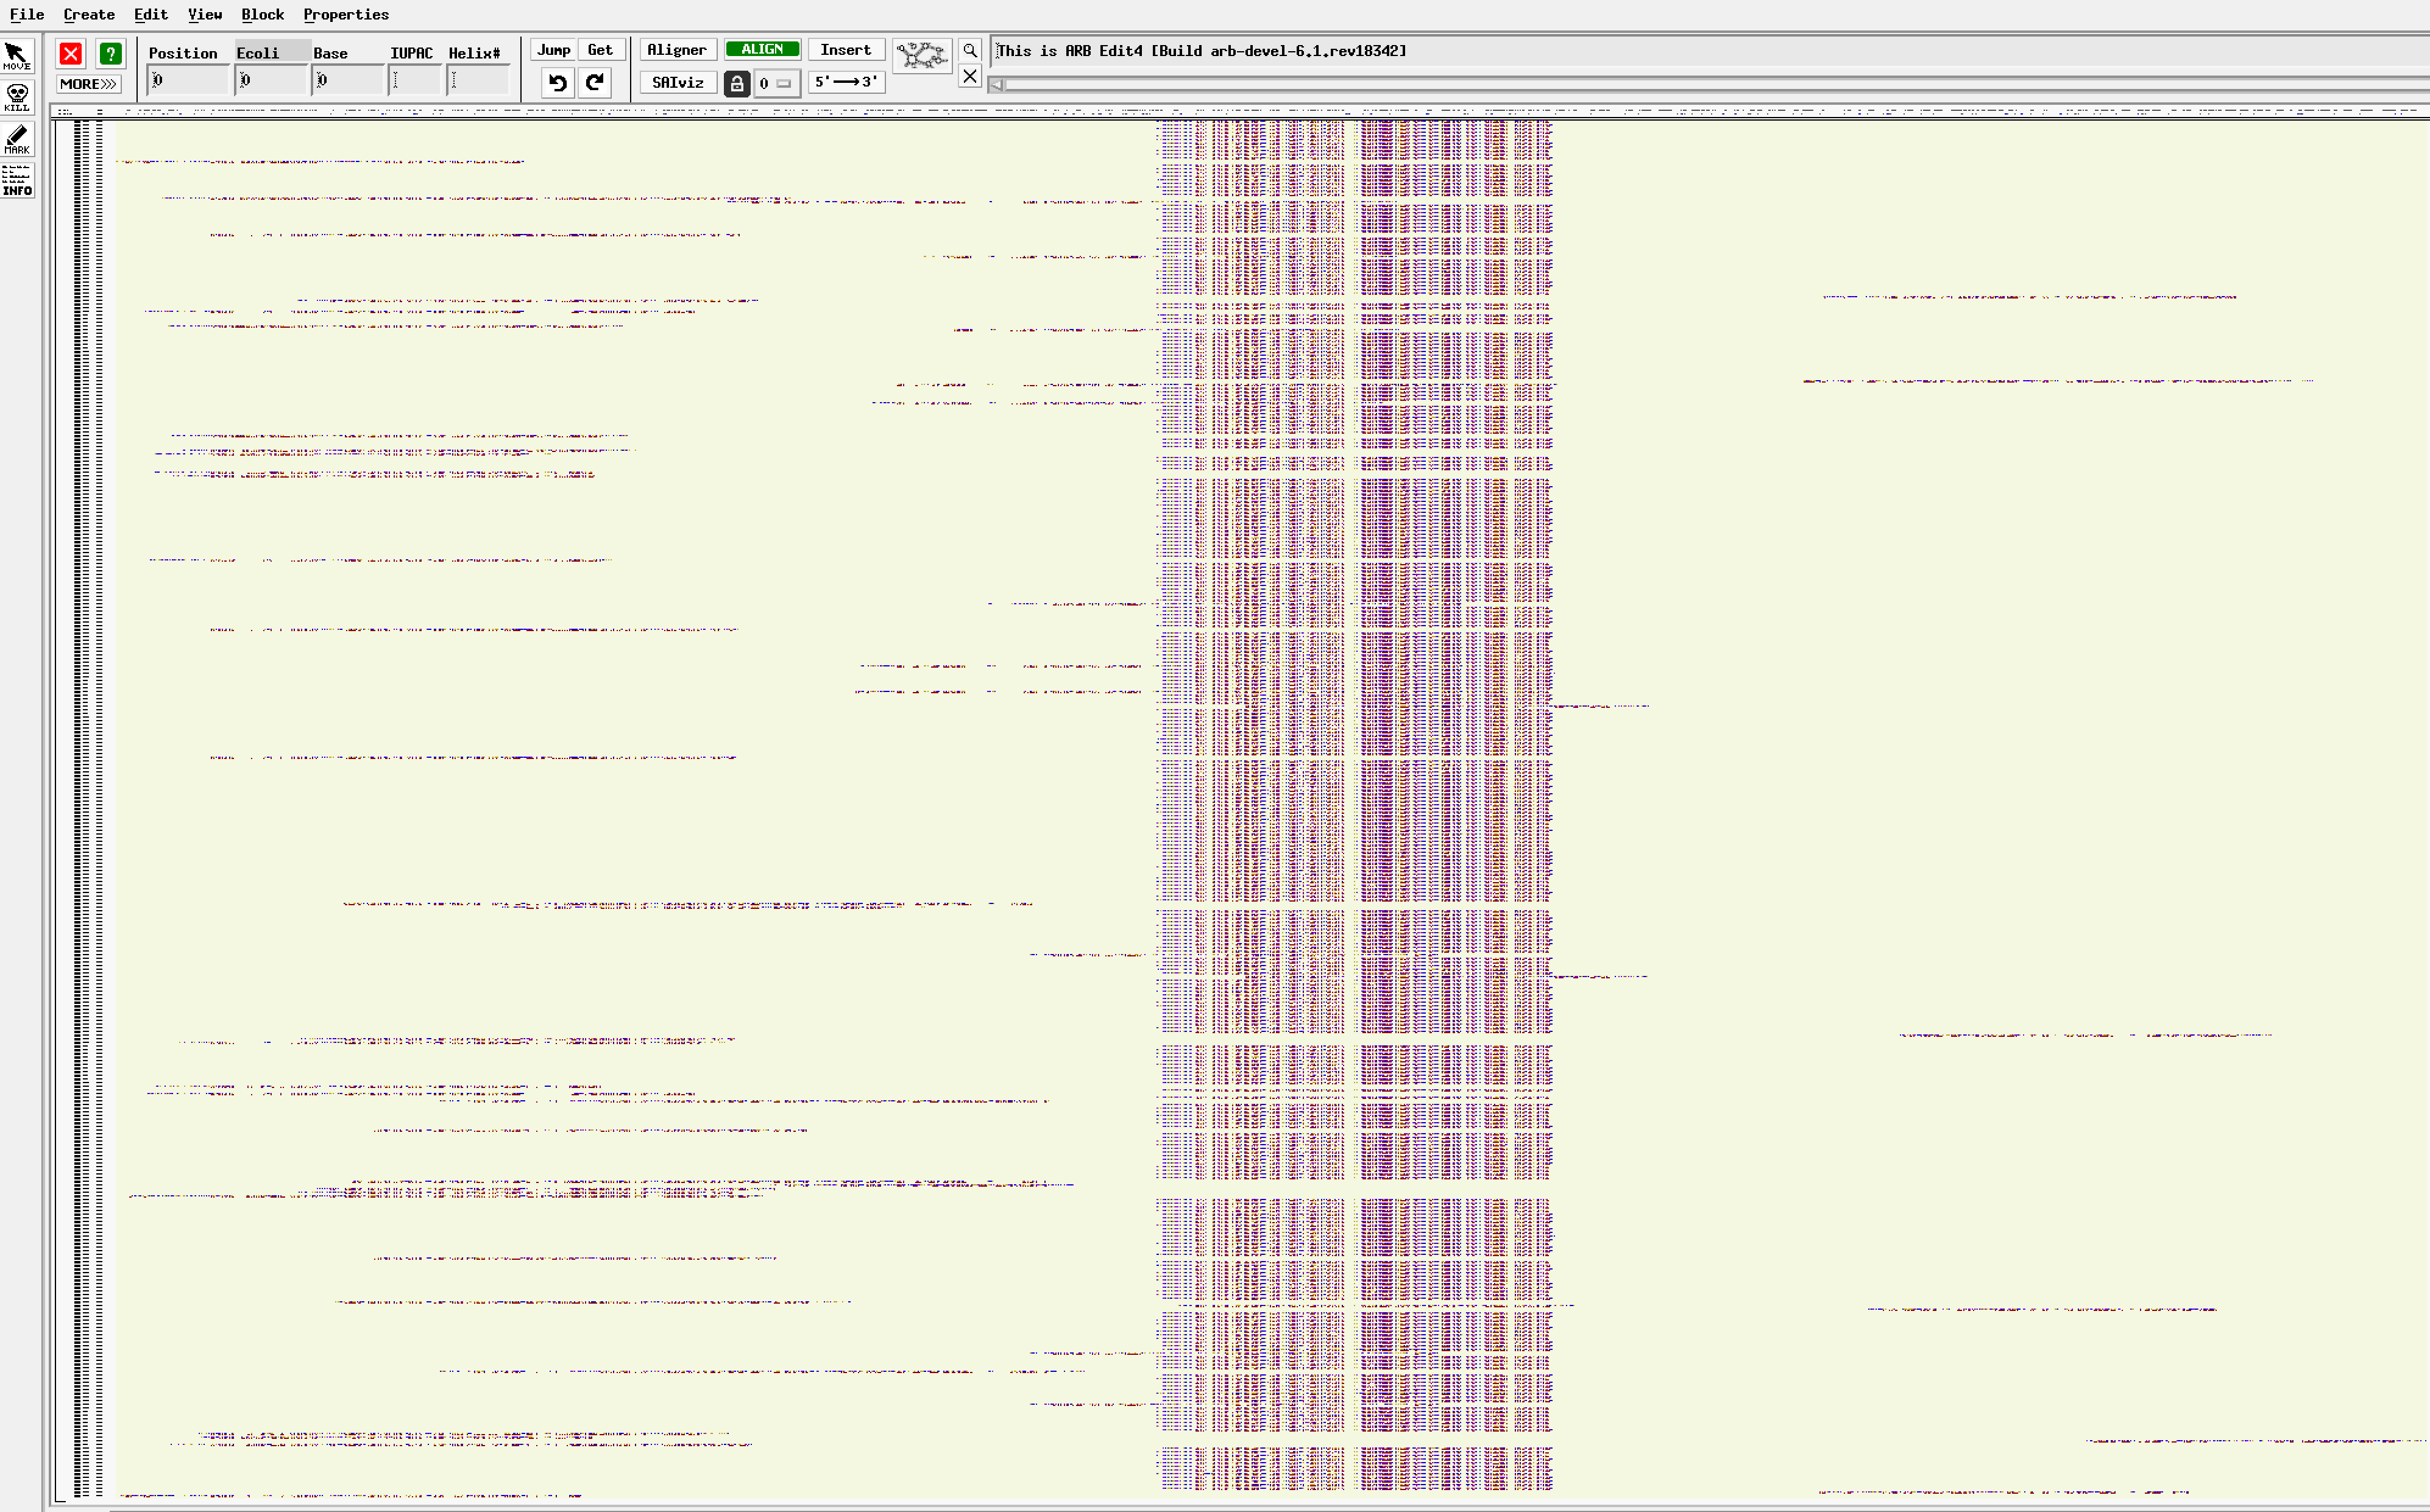


**Supplementary Figure SF7:** Example of optimal amplicon sequences affiliating with their next relatives in the LTPlus. The images exemplify how different OPUs with are nested depending on their relative internal distances, and that (in general) most of the sequences affiliate with a very short branch with closest relatives. The short distance is due to the short length of the amplicon lacking enough sequence information. Longer branches may indicate alignment problems.


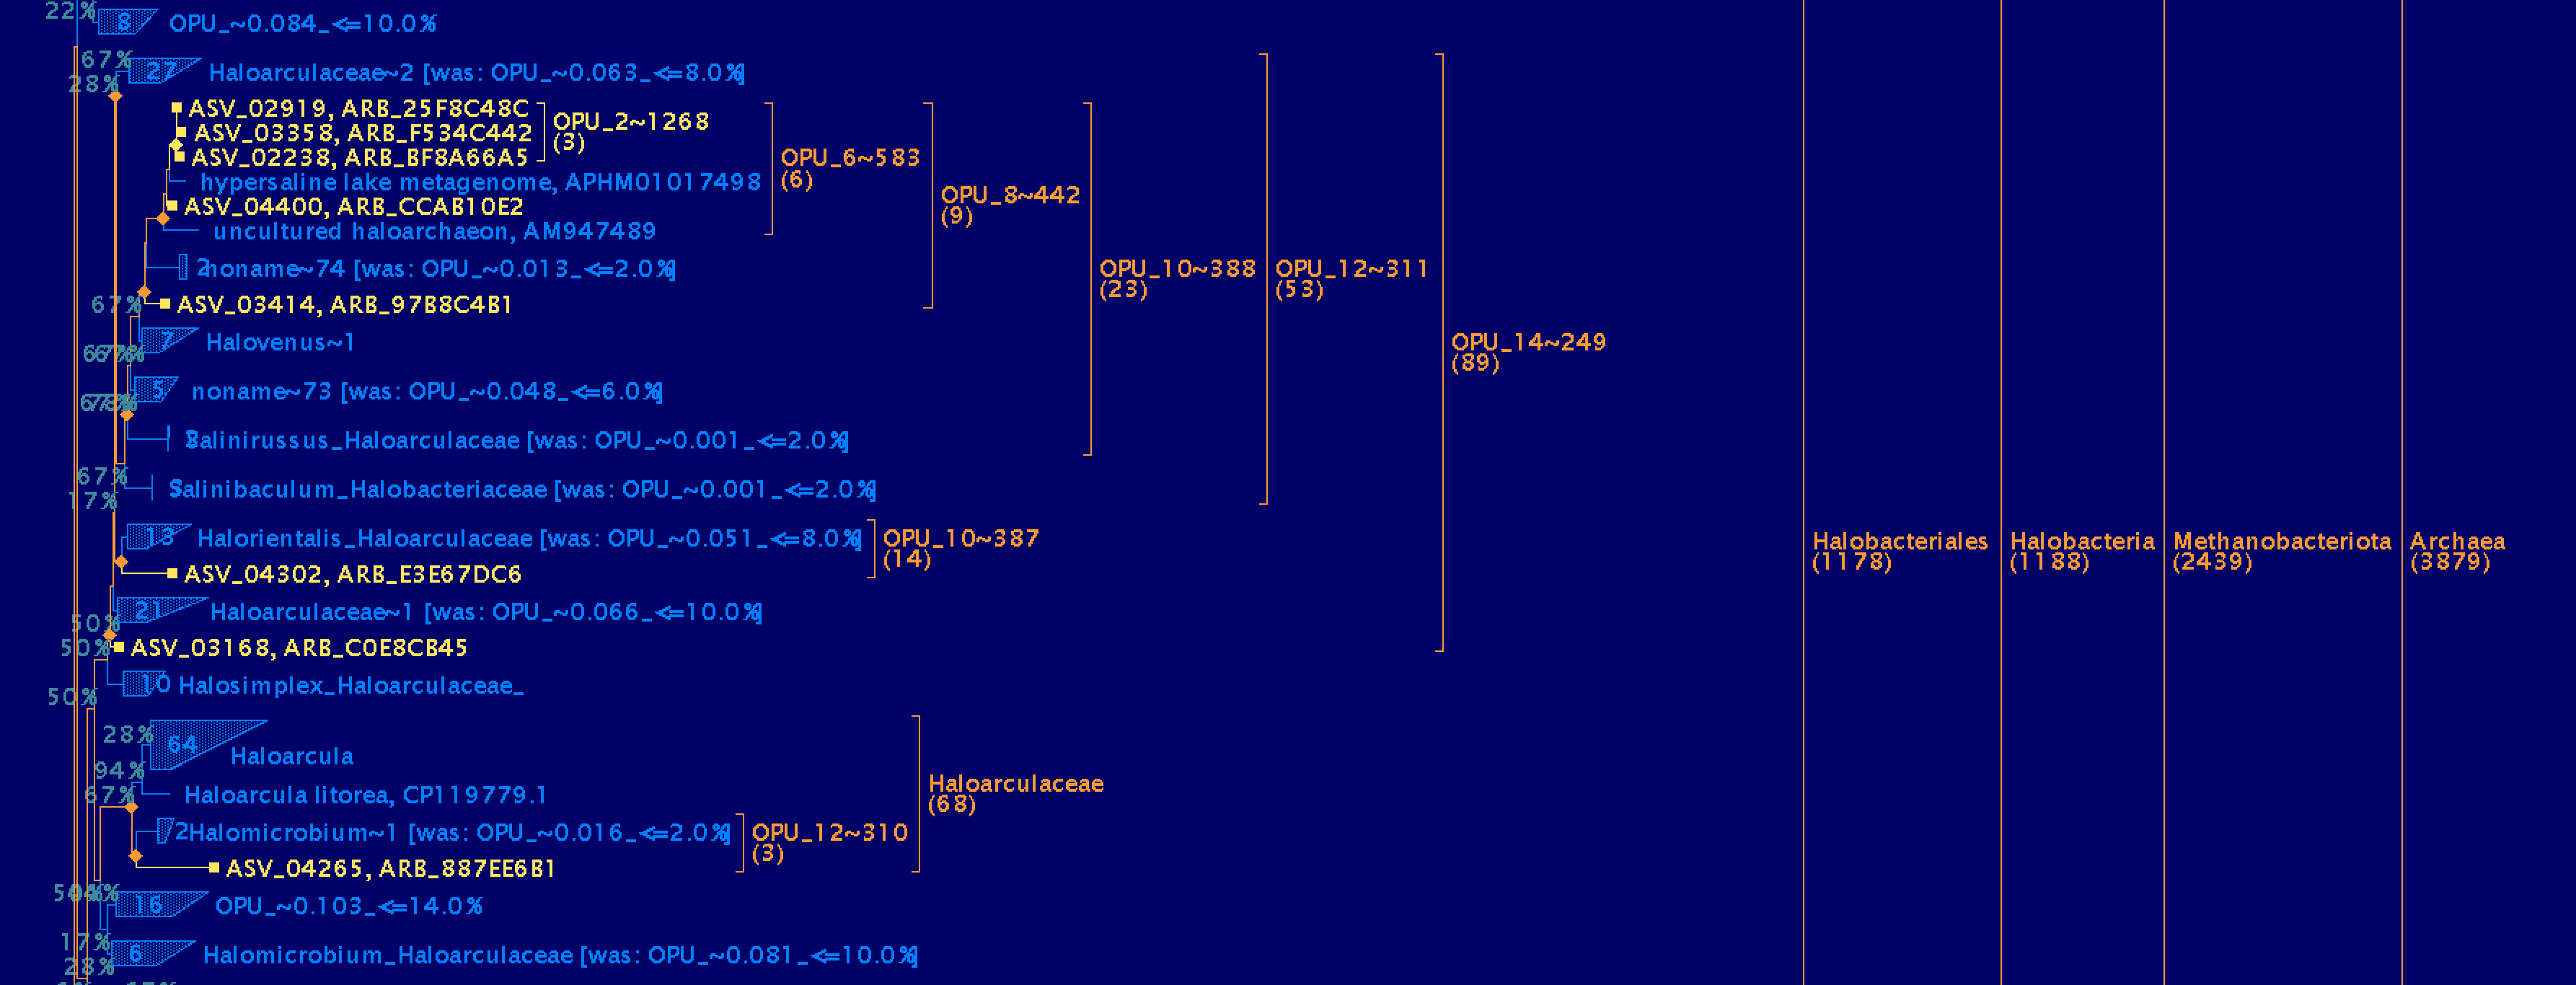


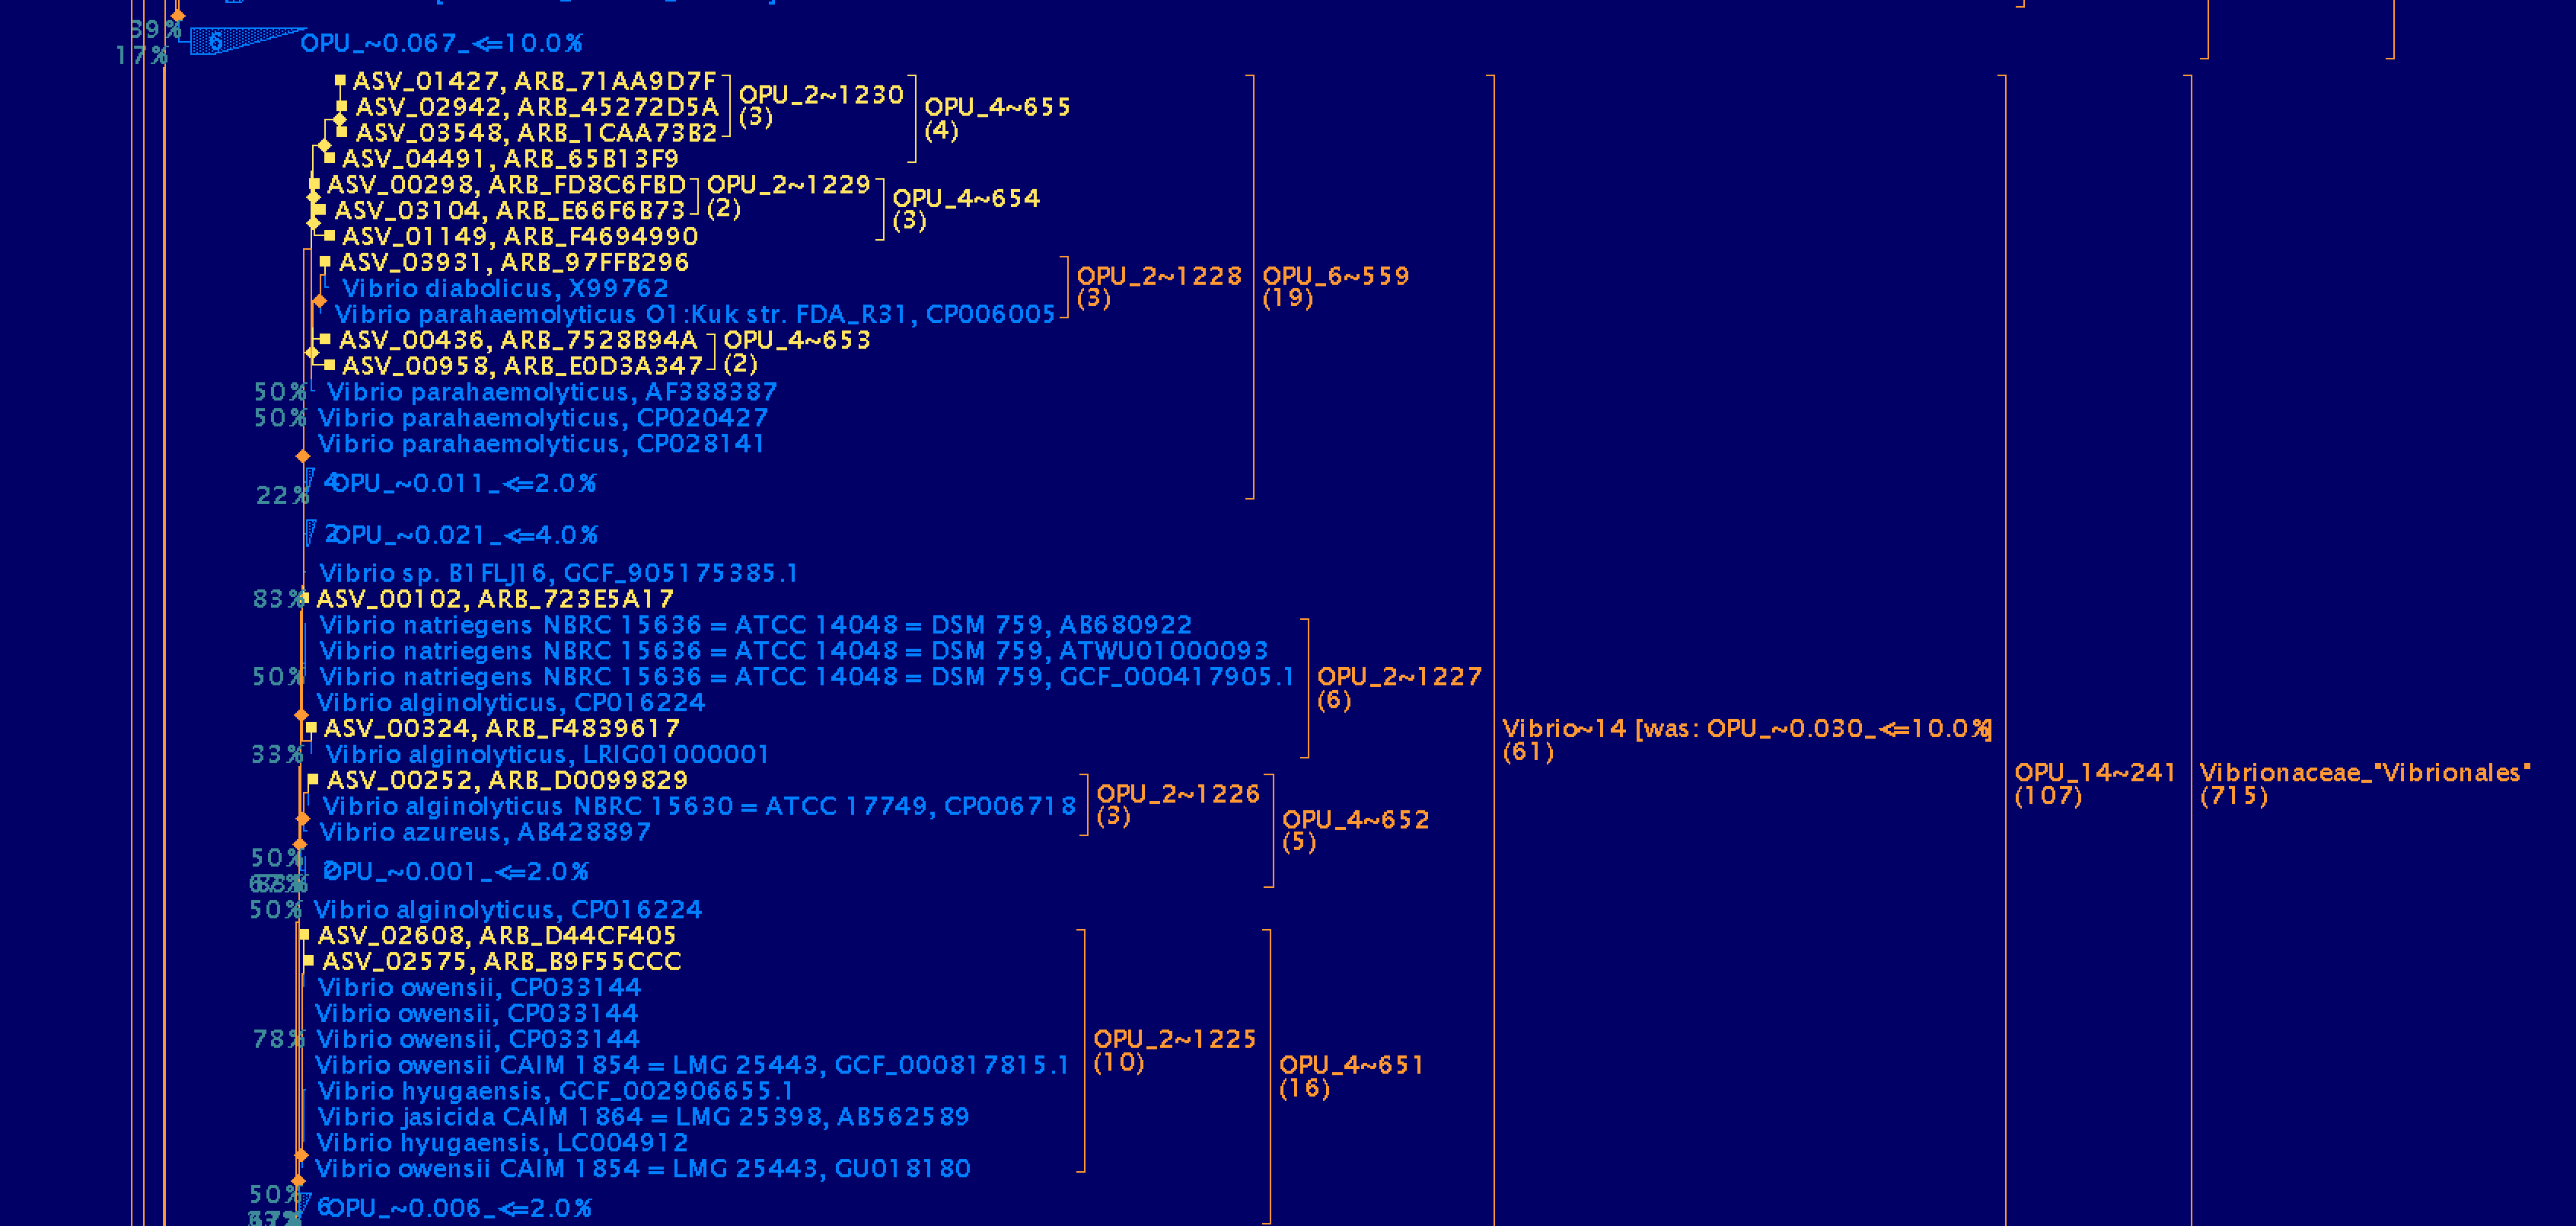


**Supplementary Figure SF8:** Example of sequences of Eukarya that have not been removed from the tree. The macros not always detect non prokaryotic amplicon sequences to be removed. In general, if belonging to an eukaryote, the sequences affiliate outside both prokaryotic domains as the LTPlus does not take into account eukaryote 18S rRNA gene sequences.


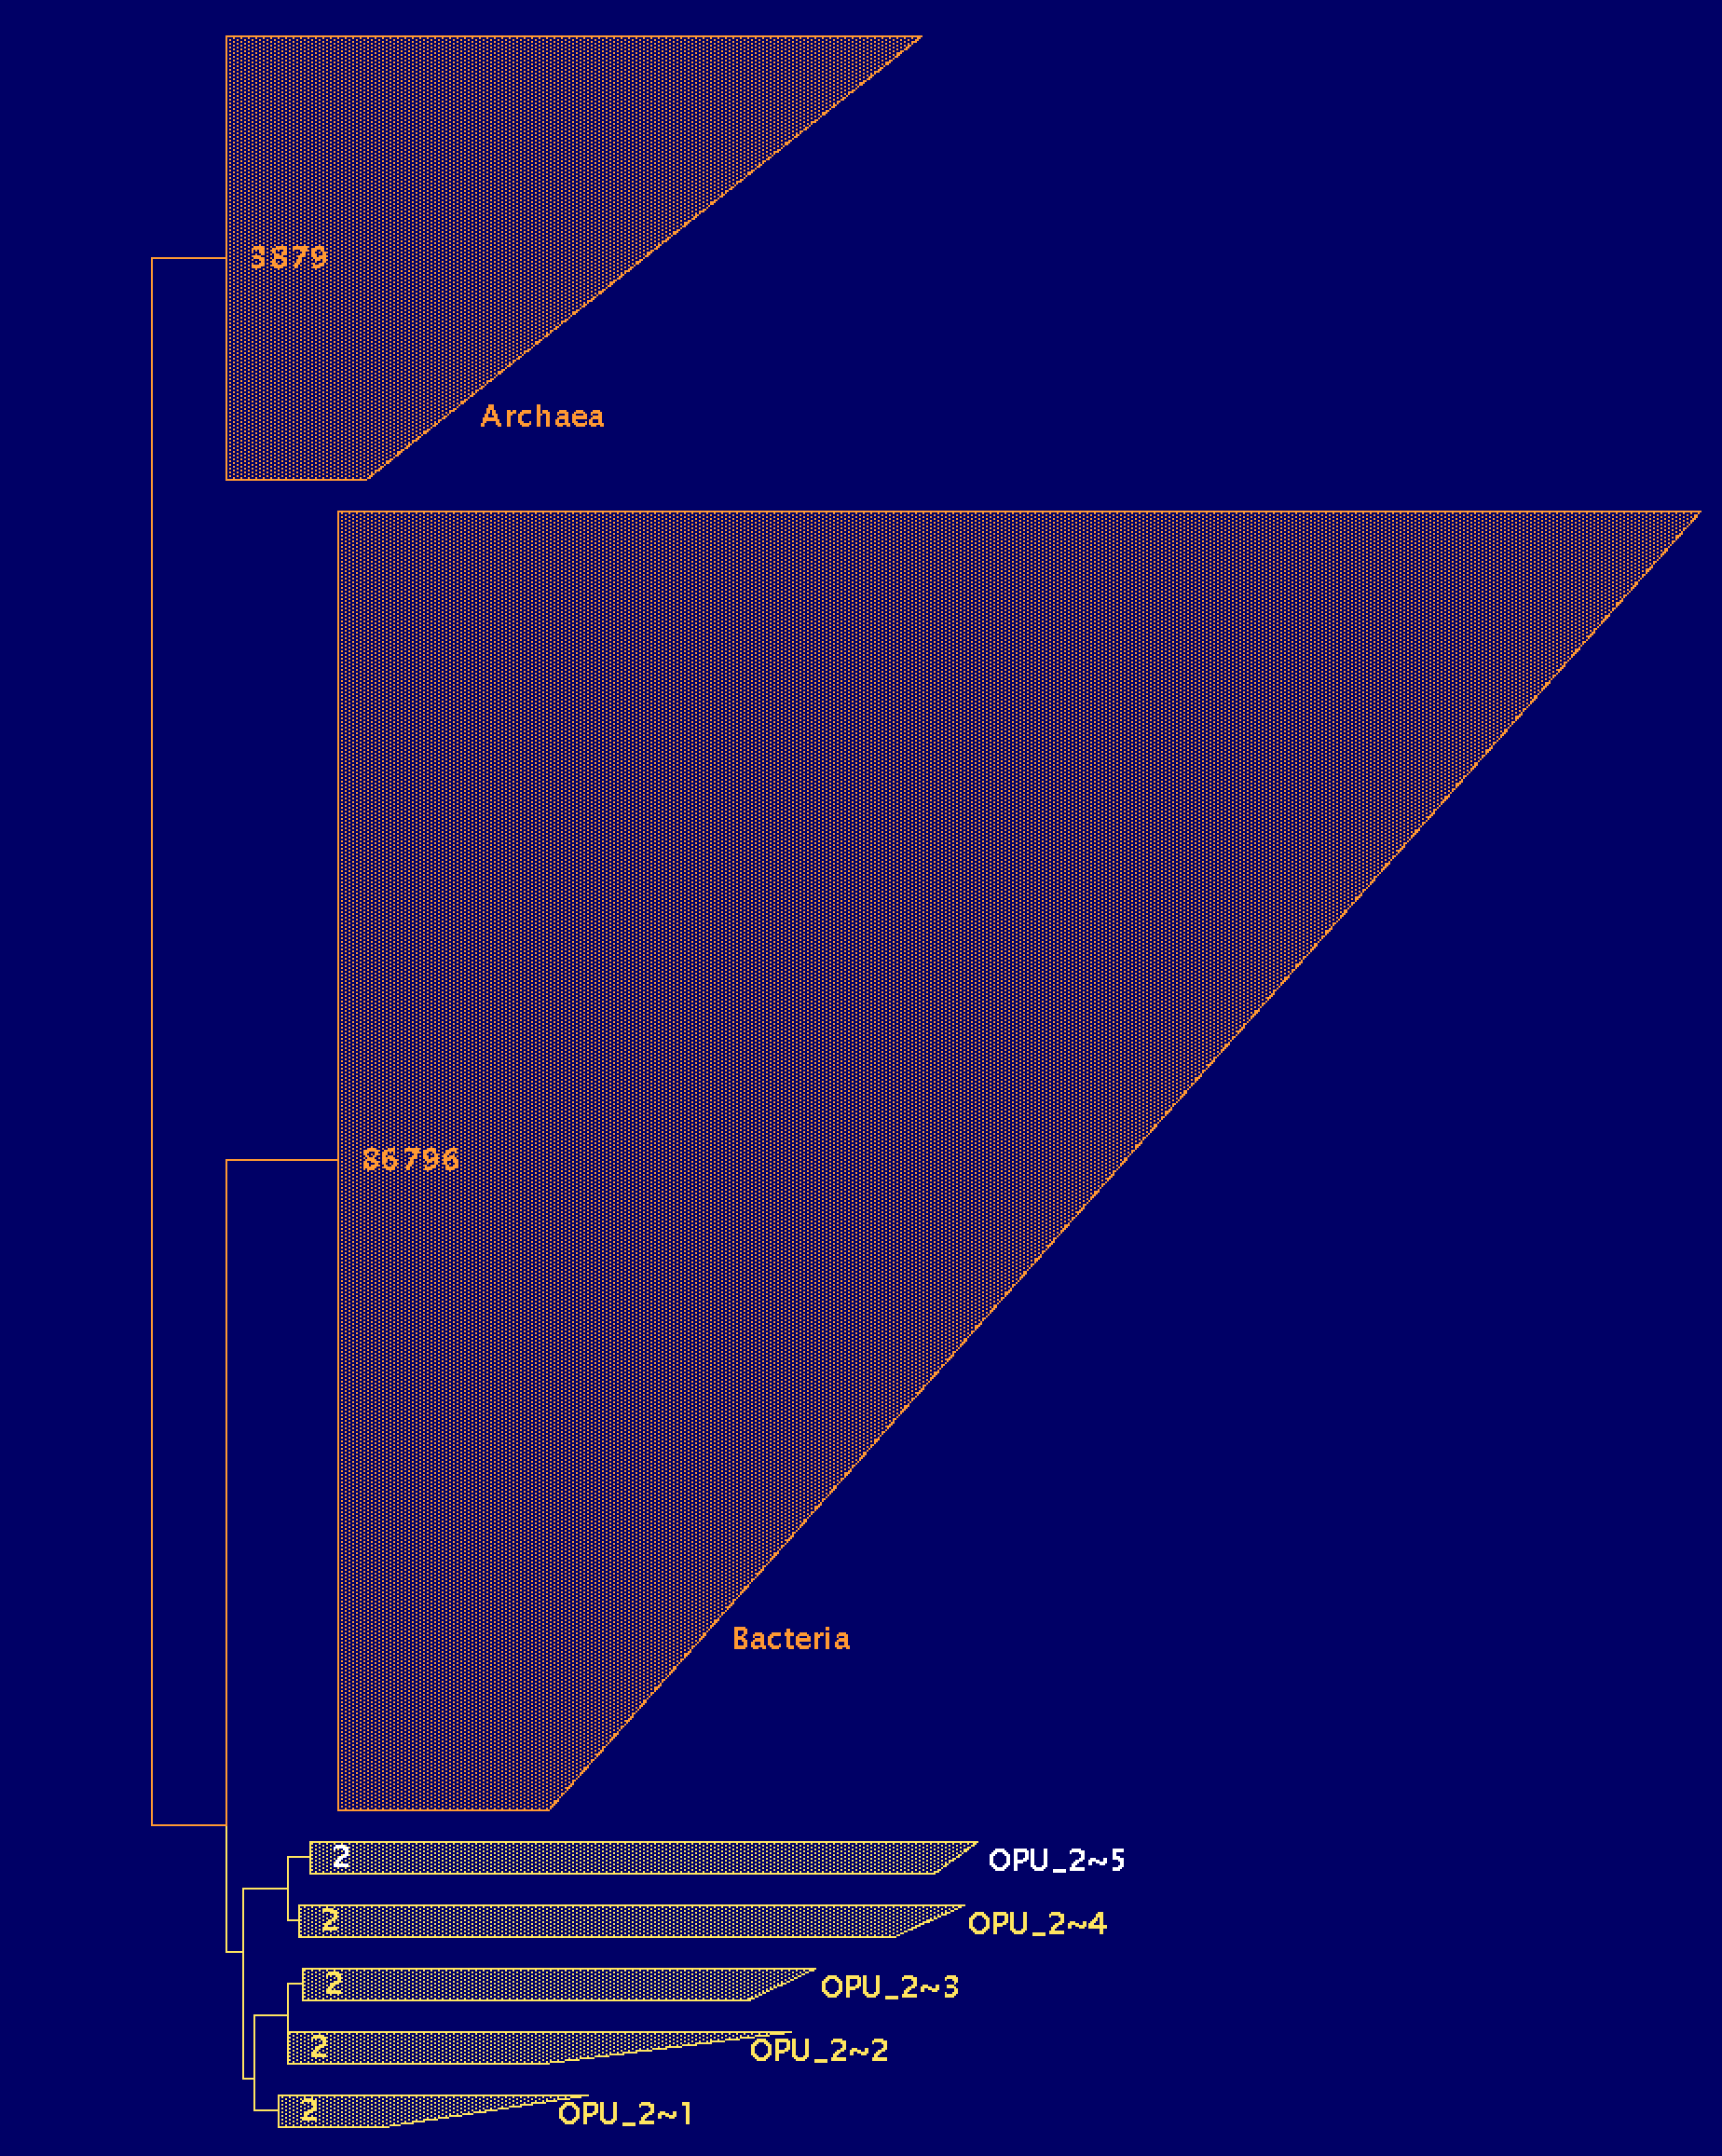


**Supplementary Figure SF9:** Example of no 16S rRNA gene amplicon sequence. Among the amplicon sequences, there were some that affiliate always with long branches and need to be removed from the study. This example of ASV _00386 seems to affiliate with uncultured members of the *Selenomonadaceae* (A). However, the alignment itself was wrong and did not align within the homologous base range expected (B), and the blast results did not render any close relative sequence using megablast, and only some similar sequences (70% identity) with some sequences of a published genome (in this case OZ006997.1) were identified using discontinuous megablast (C).

A) tree excerpt showing the position of the sequence ASV_00386 with long branches affiliating within the *Selenomonadaceae.*


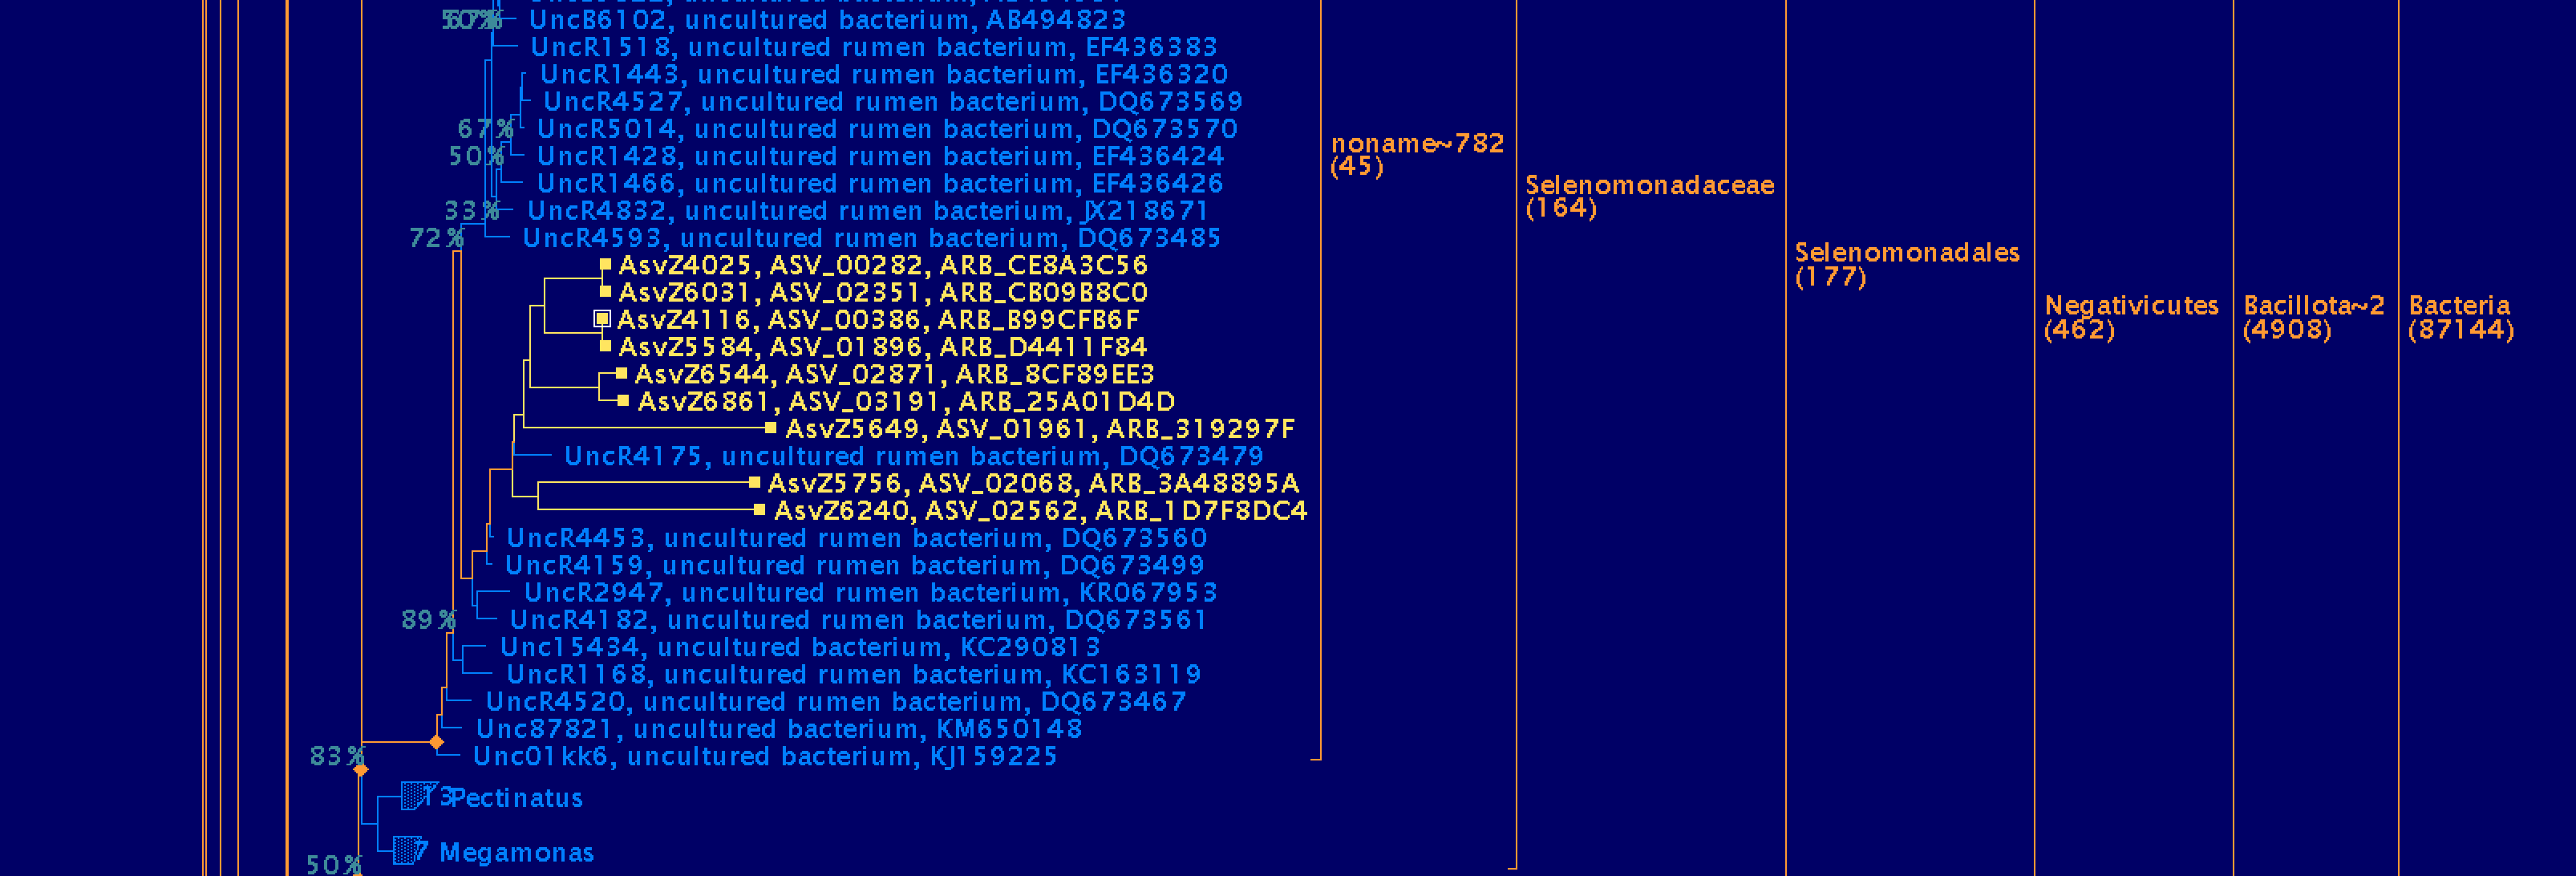


B) sequence alignment showing that ASV_00836 (highlighted in yellow) is not aligned with the expected homologous base range for which the amplicon sequences were generated.

**
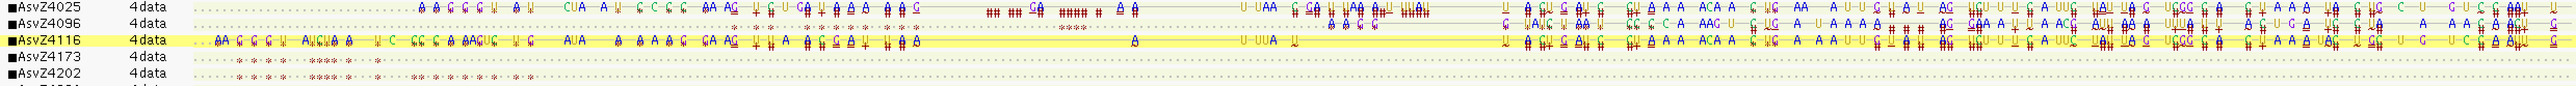
**


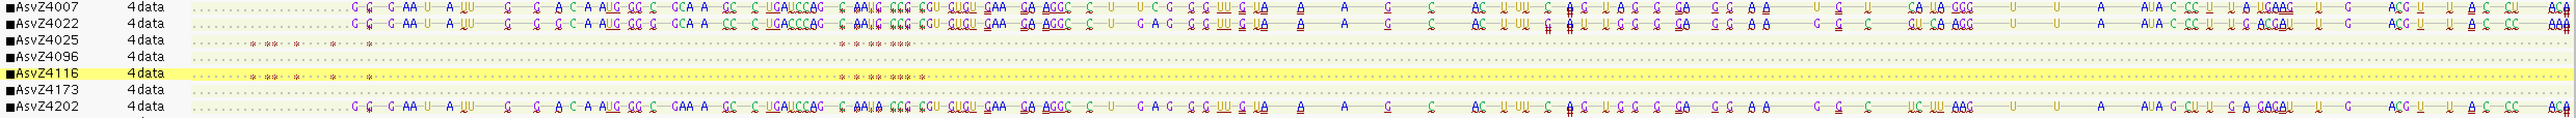


C) discontinuous megablast results showing that the read does not match a 16S rRNA gene sequence, but some sequences in the (in this case) genome of a *Ligilactobacillus*.


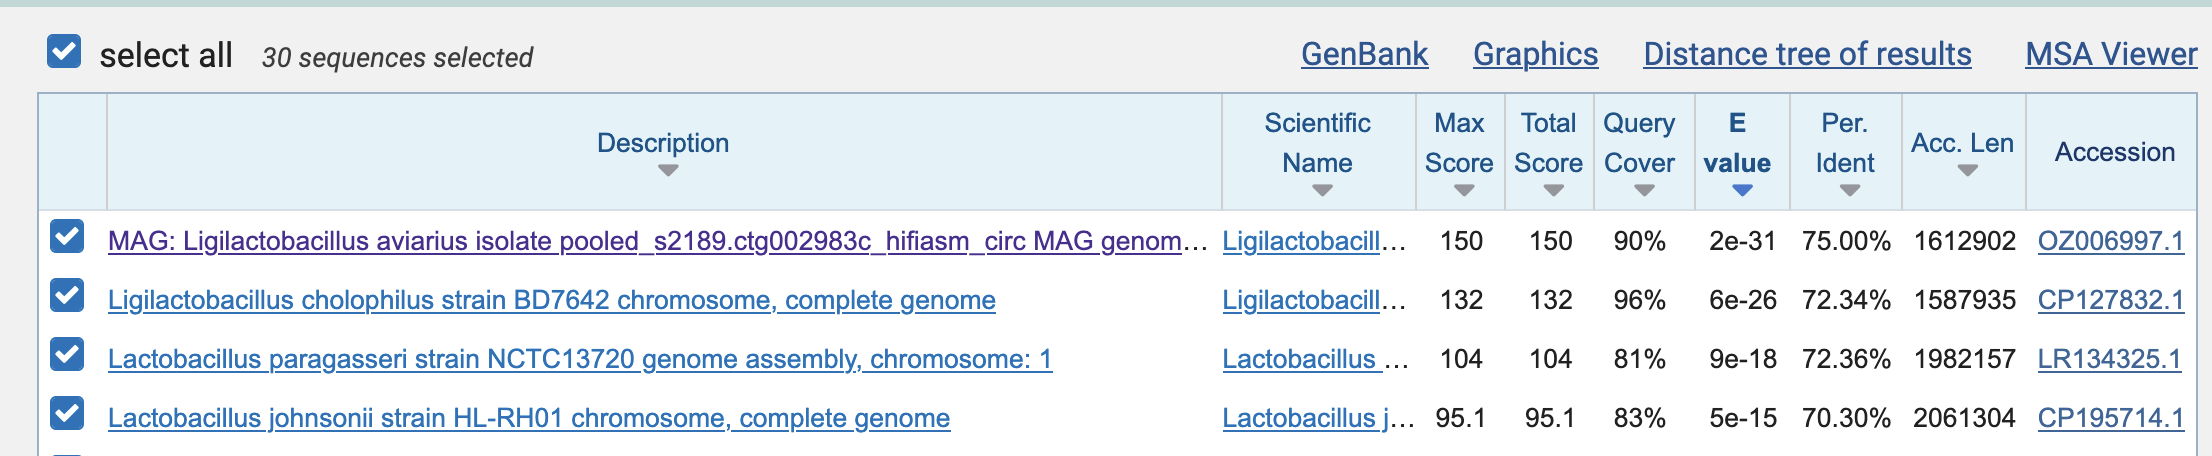


**Supplementary Figure SF10:** Example of amplicon reads sequenced using the Illumina (A and C) and Nanopore (B and D) platforms, and inserted in the same phylogenetic branch showing different branch lengths. A and B show the sequence insertion in the tree and C and D show the alignments with the reference sequences highlighted in yellow. (data from Veselovsky.et al., 2025).

| A | B |
| --- | --- |
| 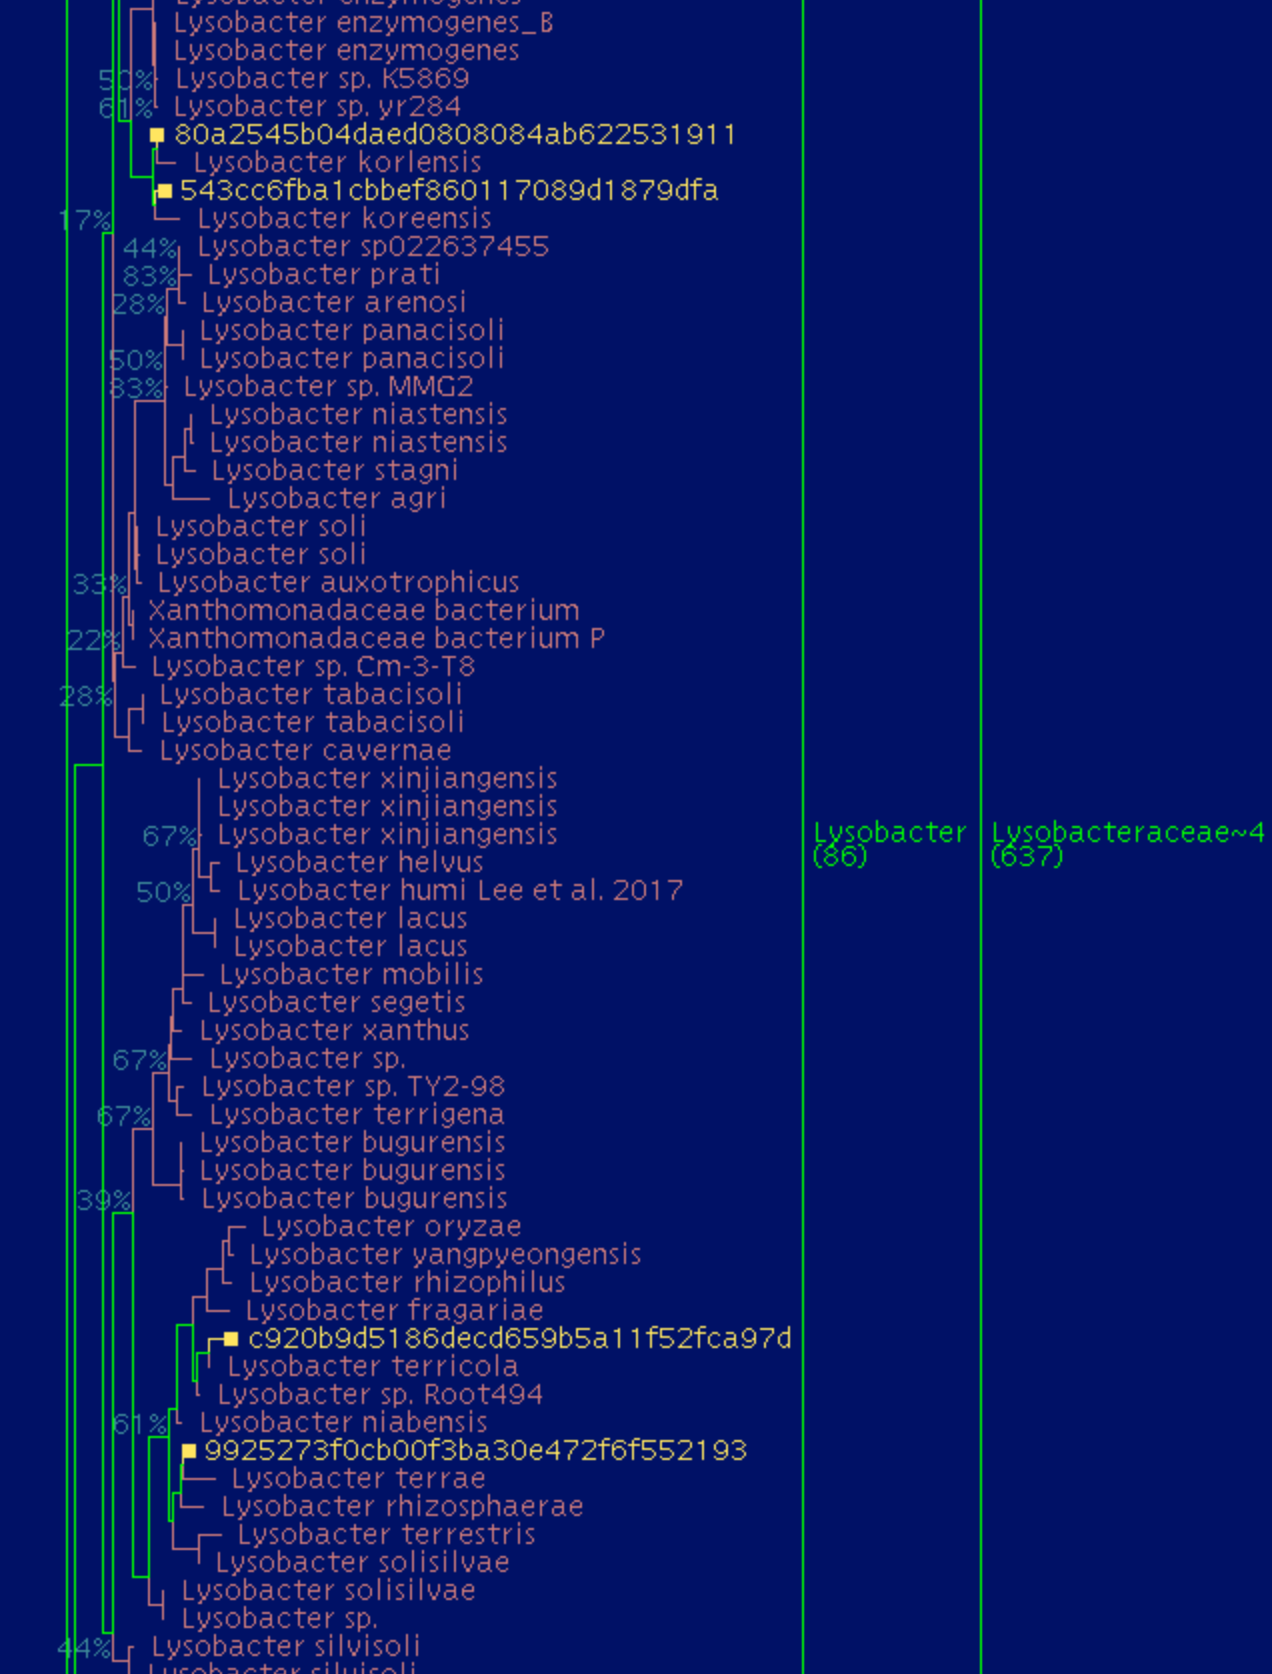 | 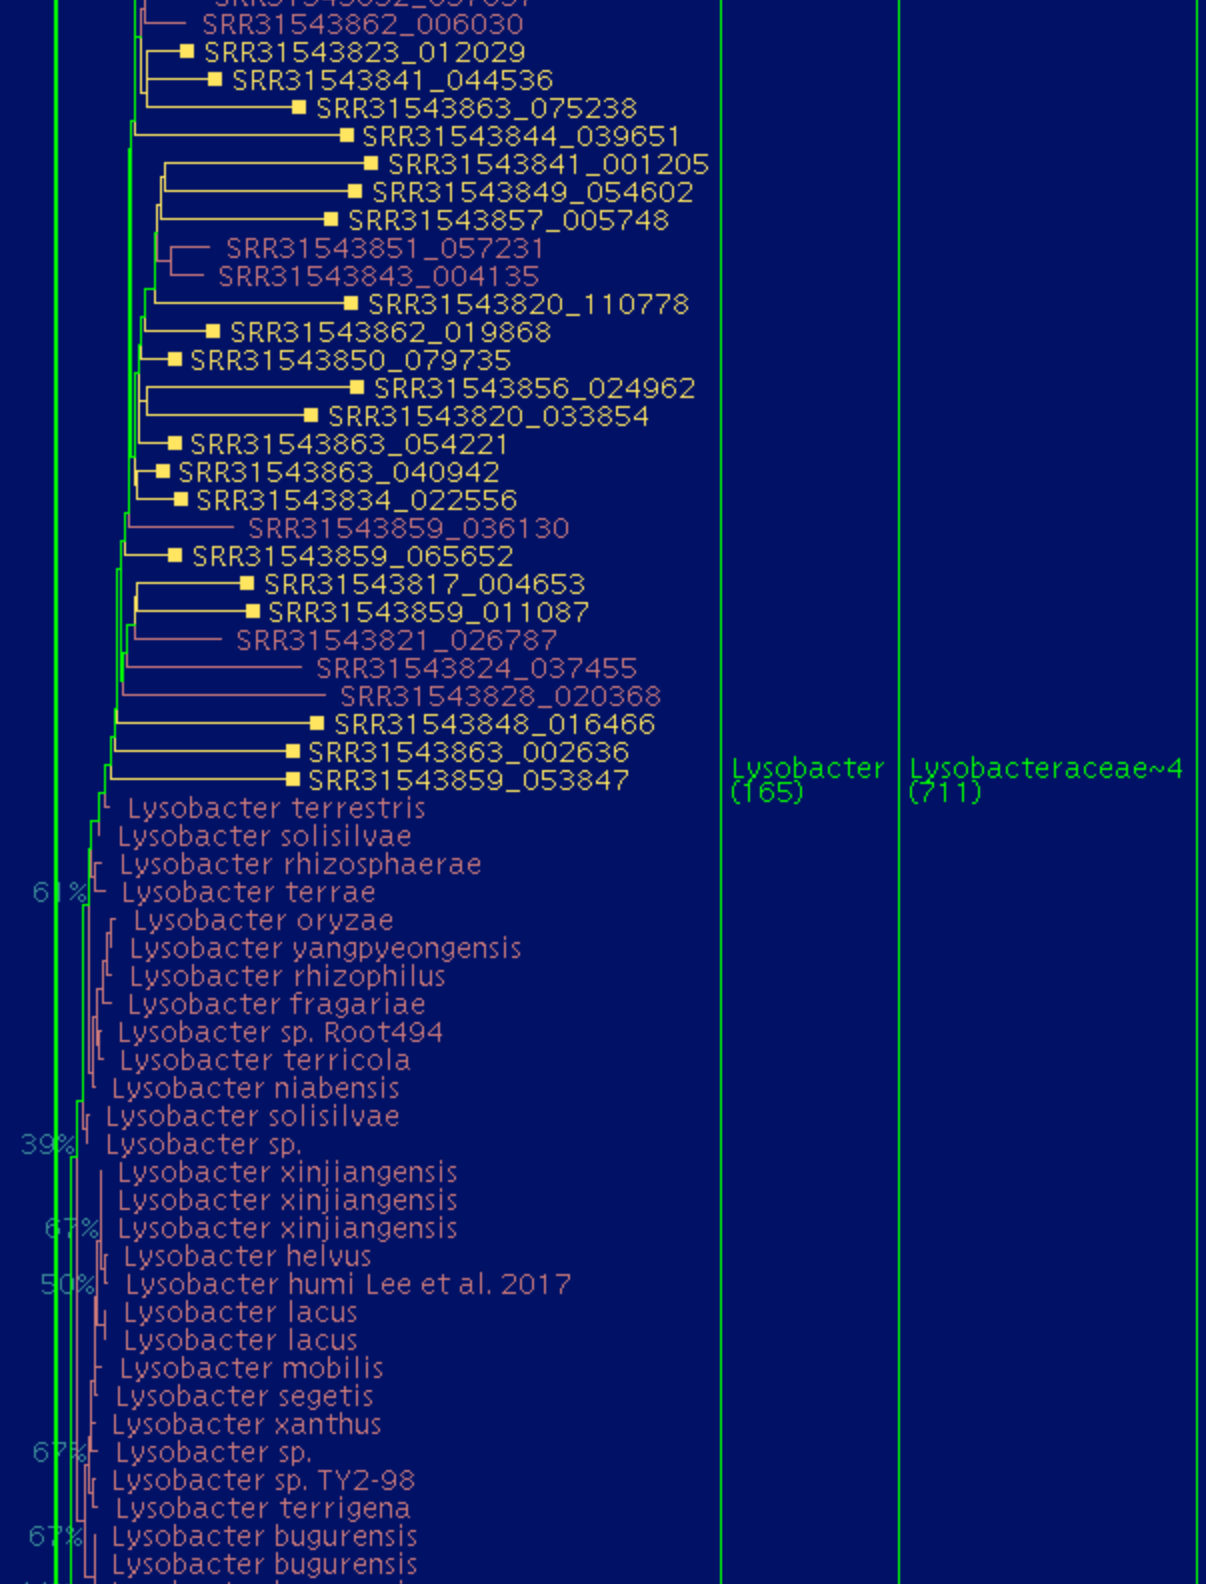 |
| C  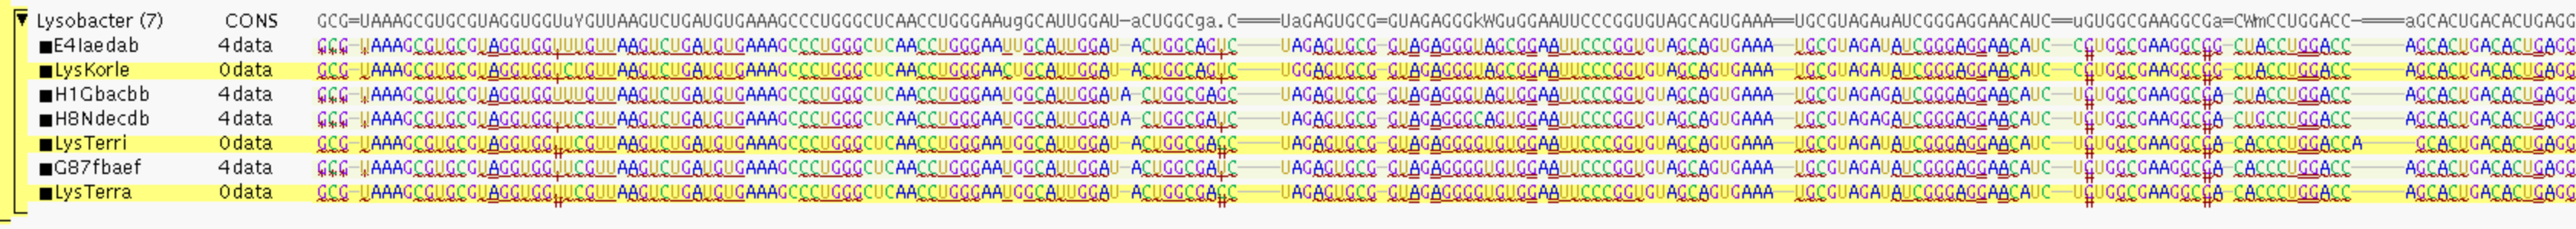 | |
| D  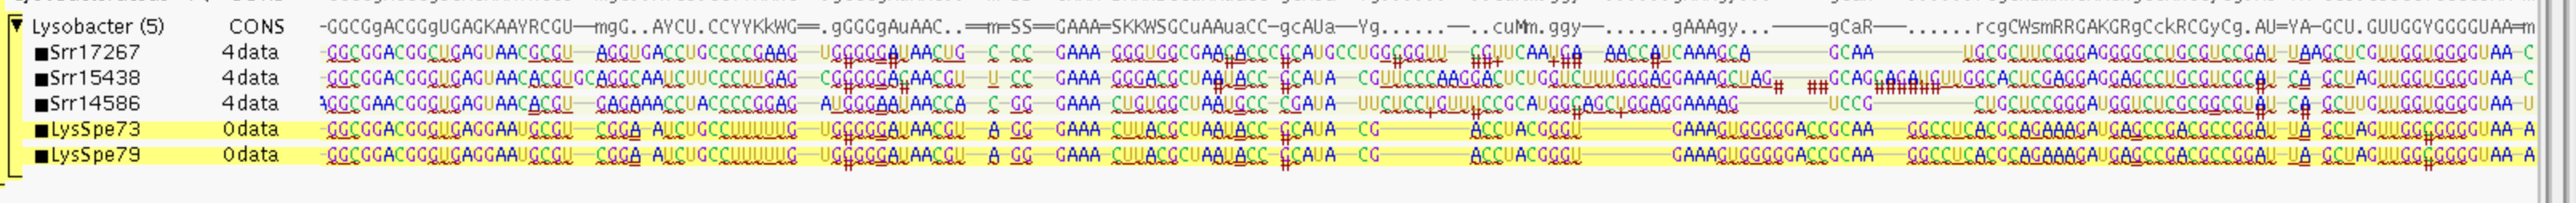 | |

**Supplementary Text Stxt2:Recommendations for manual evaluation of the OTUs that had been removed from the approach**

In general, the affiliation of most sequences seems to be correct. There is always a percentage <15% of the sequences that are discarded. It is highly recommendable to manually inspect the tree positions of these discarded sequences, just because the program may not be infallible and either some discarded sequences could be good and usable amplicon reads. This may be especially relevant if the discarded sequences belong to relevant OTUs or ASVs. However, in our experience these discarded reads may not modify significantly the final results as in general, relevant OPUs representing the most abundant taxa are formed by a large number of amplicon sequences rather than being singletons that appear unclustered.

In addition to this, it is recommended to manually supervise the tree to detect sequences exhibiting long branches that had not been discarded, which should be removed as they may lead to misinterpretations. Such actions would help in fine-tuning the results, but in general, the output generated after automatization would render good results to be analyzed.

Example of inadequate aligned and bad aligned Pacbio sequences (Biada et al., ) sea Rabbit gut microbiome.


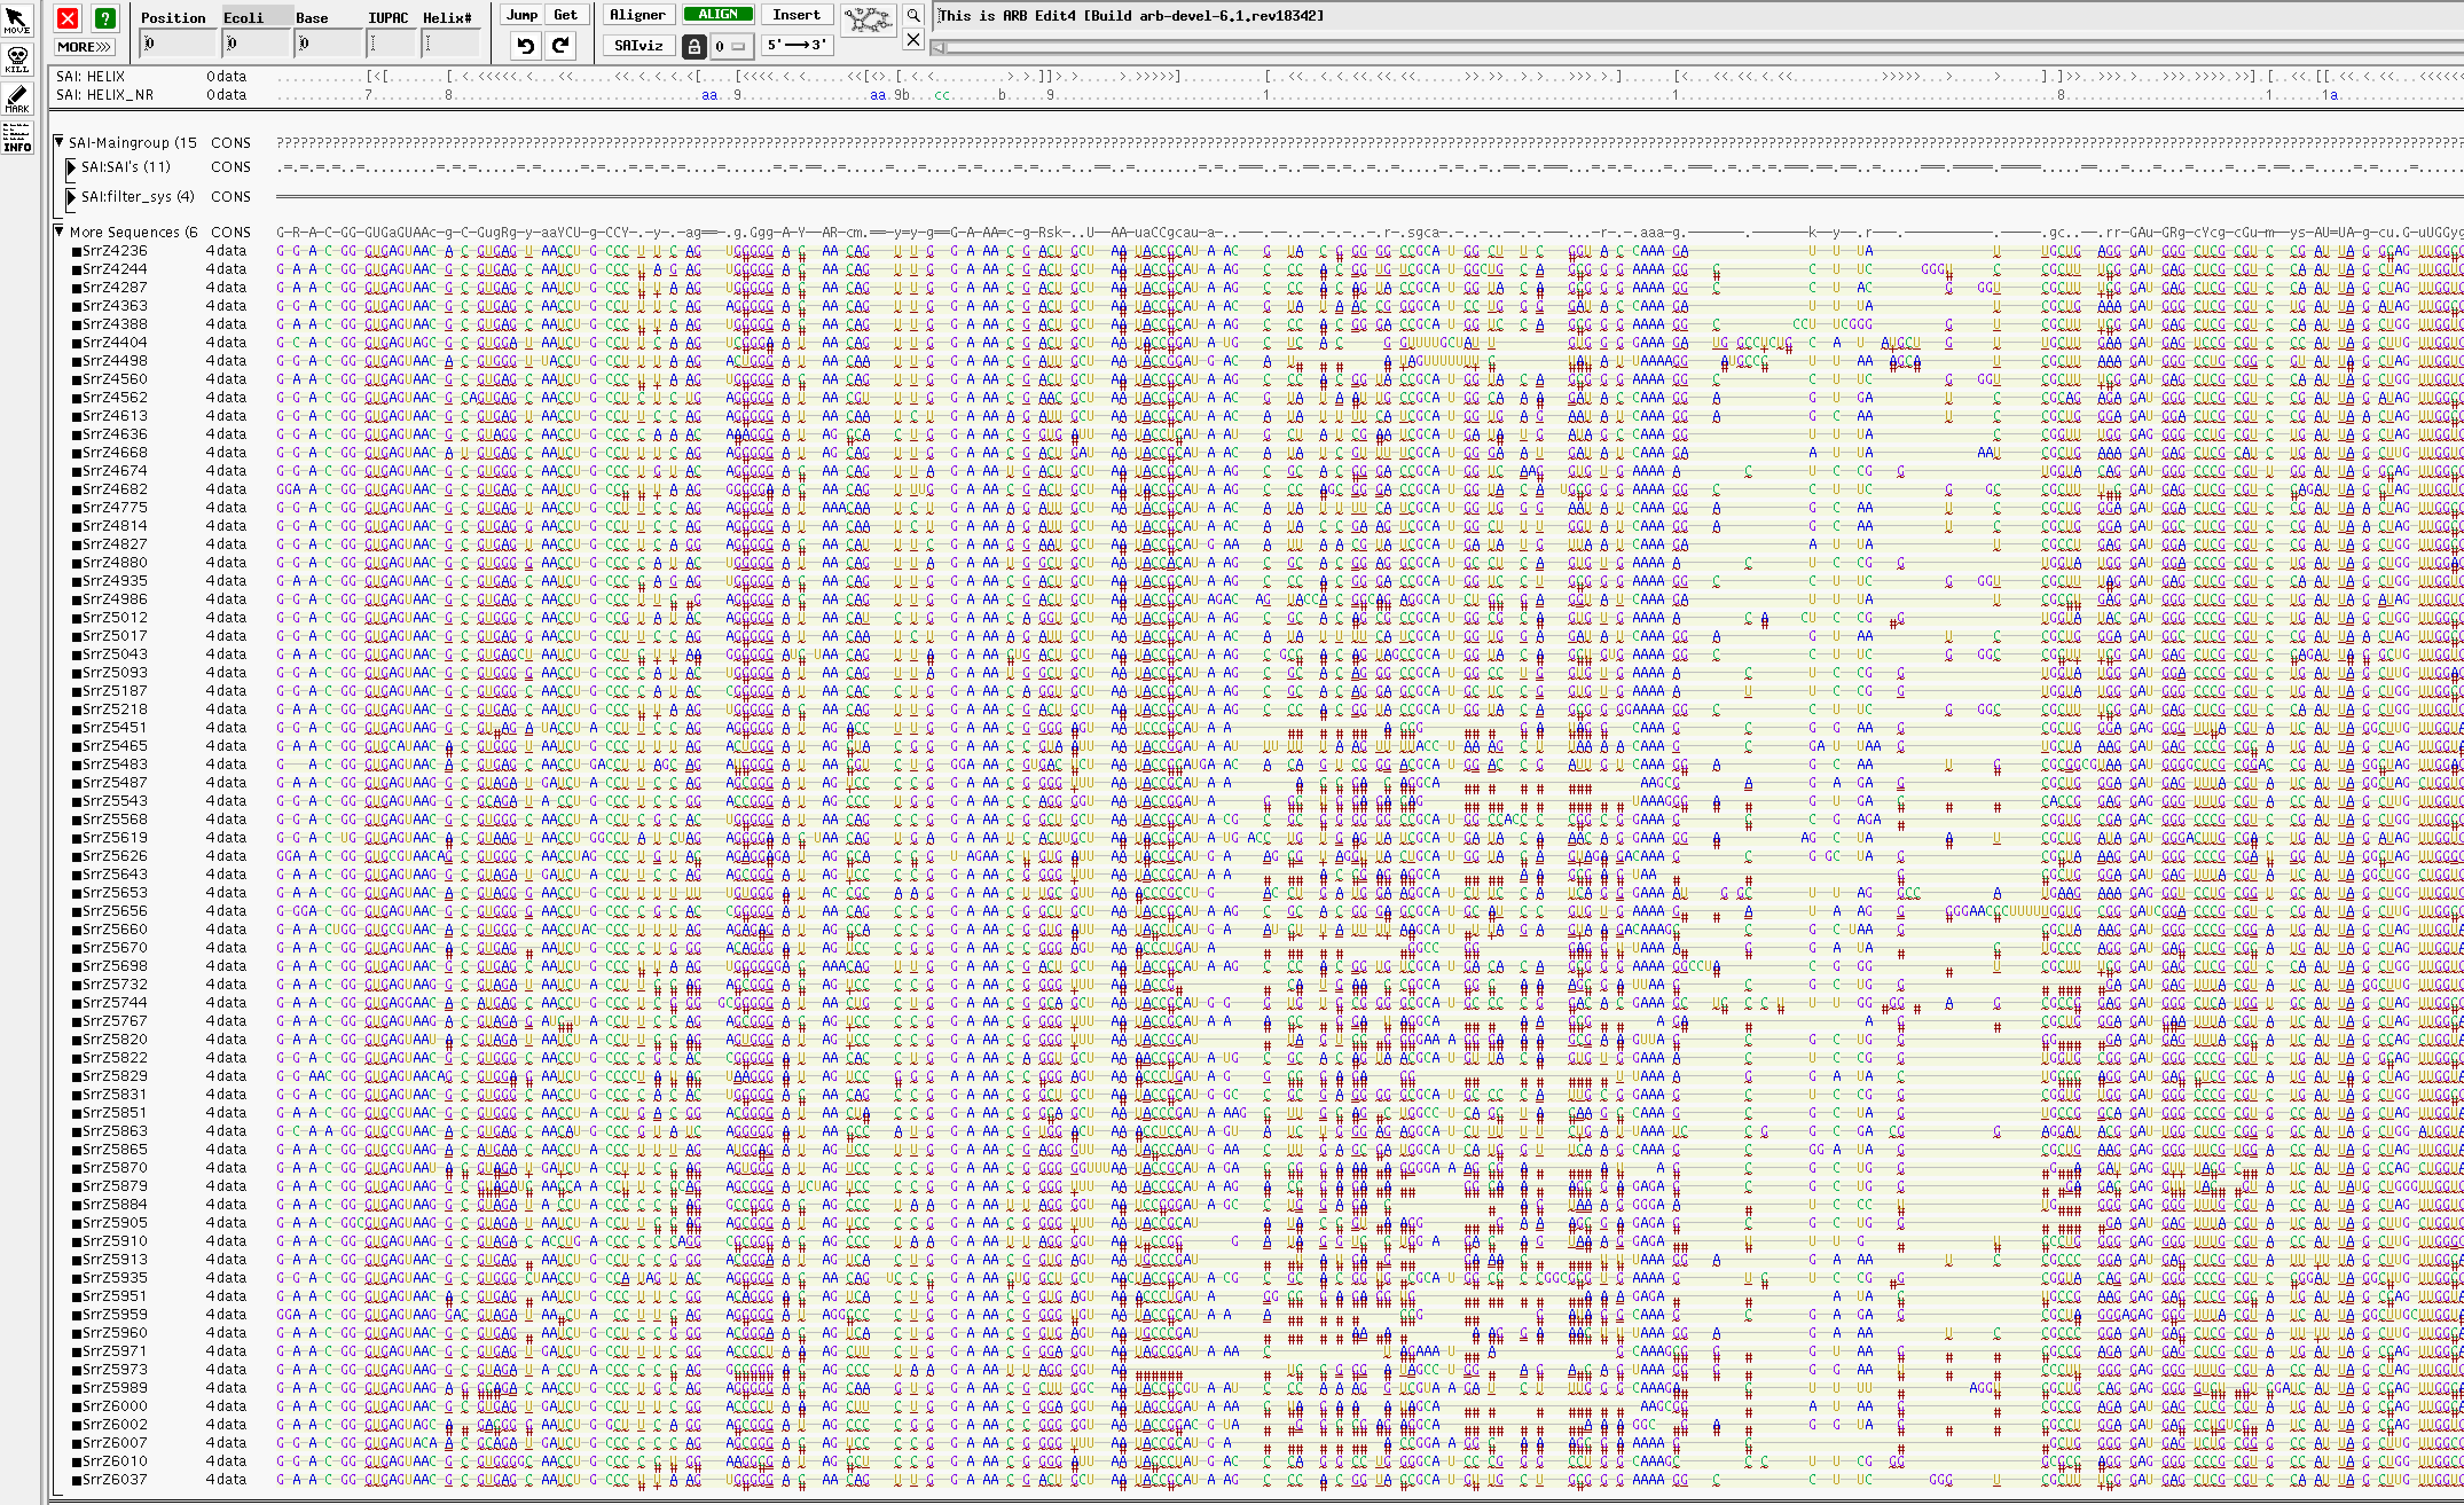


**Text Stxt3:Evaluation of the automatized OPU design using 16S rRNA amplicon sequences.**

The tests were done with our former amplicon data that had been either published or is awaiting to be published from both Illumina and PacBio platforms, as well as from data retrieved from published surveys (Table ST1). In general, the sequences kept in the tree and OPU reconstructions affiliated with known reference sequences with relative short branches (Figure SF7). The approach discards <10% of the reads, from the survey analyzed in Table ST4, the mean of discarded sequences is 13.03% ± 8.31 and a median of 8.31%. Only for 13 out of 38 samples the discarded value was >14%. In accordance with the results, a great part of the sequences discarded were probably either non-rRNA sequences or chimaeras. Only few sequences could be just singletons, which identity, if necessary, should be manually analyzed.

The wrong sequences could be identified as these exhibited longer branches, many where not aligned within the amplified range of homologous positions, or their alignments were very bad. In general, some of the discarded sequences belonged to amplified Eukarya 18S (2.34% ± 3.1, and a median of 0.54%). In most of the cases the removed sequences were of 16S rRNA gene amplicons, but the lack of pairing in the helixes seemed to indicate that these sequences could be chimeras, or sequencing/amplifying errors (see Figures SF1 to SF10). This is an important fact to be taken into account as all surveys using ASV or OTUs just take for granted that all sequences belong to rRNA and are correct.

There may be discarded sequences that, when inspecting the tree, the short branch observed indicated that were real 16S rRNA gene sequences that should have been taken into account. However, in general these sequences represented very low abundant ASVs, and being discarded did not change the real output. In any case, as we indicated below, the optimal procedure would be when a final manual inspection of the tree is performed to recognize discarded sequences that should be included, and fine-tune the results.

As it can be seen in the Table ST1, the approach can be used to analyze all different platforms and approaches rendering short and long sequences. We have tested not only Illumina amplicon reads, but also PacBio and Nanopore amplicons and raw reads and contigs extracted from metagenomes. One of the goodness of the approach is that metagenome sequences belong to different 16S rRNA gene sequence regions, but the OPU approach affiliates them using high quality and almost complete sequences and therefore the affiliation is accurate with independence of the region sequenced.

**Reevaluation of published surveys**

The raw sequences of the different published surveys (see below) were downloaded and ASVs generated to evaluate the results of the OPUcheck approach. Here, we compare first our own published results with the current platform, and reanalyze some published data to validate the OPU approach.

**Pomar et al., 2023**


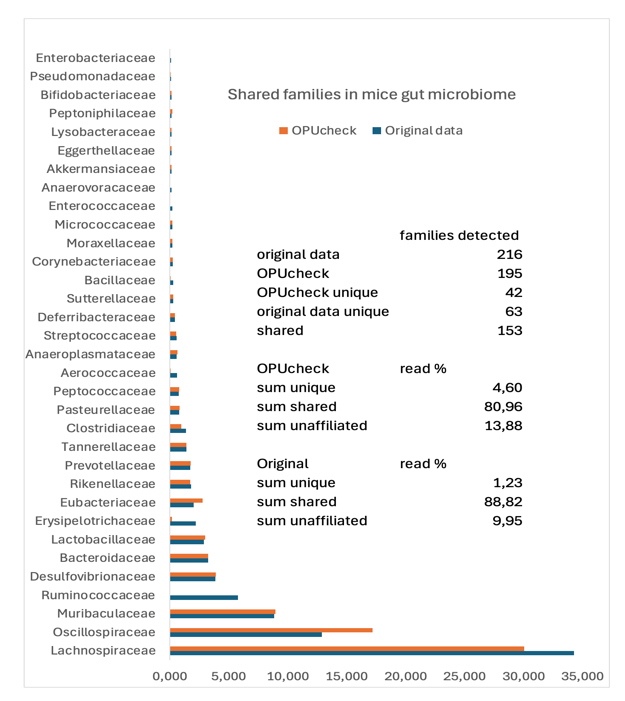
In this study, the sequences were obtained using the Illumina platform, denoised and clustered into amplicon sequence variants (ASVs), and finally the OPUs were identified using the SILVA non-redundant database (release 138.1; SILVA database; Quast et al., 2013). In Pomar et al., 2023, a total of 7,780 ASVs were grouped into 1,423 OPUs through manual curation, whereas OPUcheck generated 2,627 OPUs from the same dataset. Despite the higher number of OPUs obtained with OPUcheck, family-level relative abundance profiles were highly consistent between both approaches. In decreasing order of abundance, the dominant families were *Lachnospiraceae* > *Oscillospiraceae* > *Muribaculaceae* > *Ruminococcaceae* > *Desulfovibrionaceae* > *Bacteroidaceae* > *Lactobacillaceae* > *Erysipelotrichaceae*.

In Pomar et al., 2023, 216 families were identified, of which 13 exhibited relative abundances above 1%. Using OPUcheck, 196 families were detected, and the same 13 families exceeded the 1% relative abundance threshold. Overall, these results indicate that both approaches yield highly comparable patterns. The results between our original analyses performing the OPU assignation by manually inspecting the tree and the current based on our OPUcheck tool rendered surprisingly similar results for most of the taxa detected. The shared taxa detected covered between ~81-89% of the total read abundance, and only between ~1-5% of the reads had been assigned to different families. With some minor differences, the yields at the family level could be considered nearly identical.


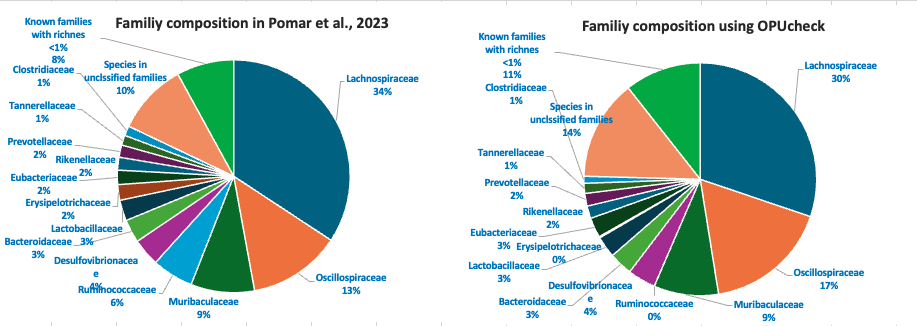


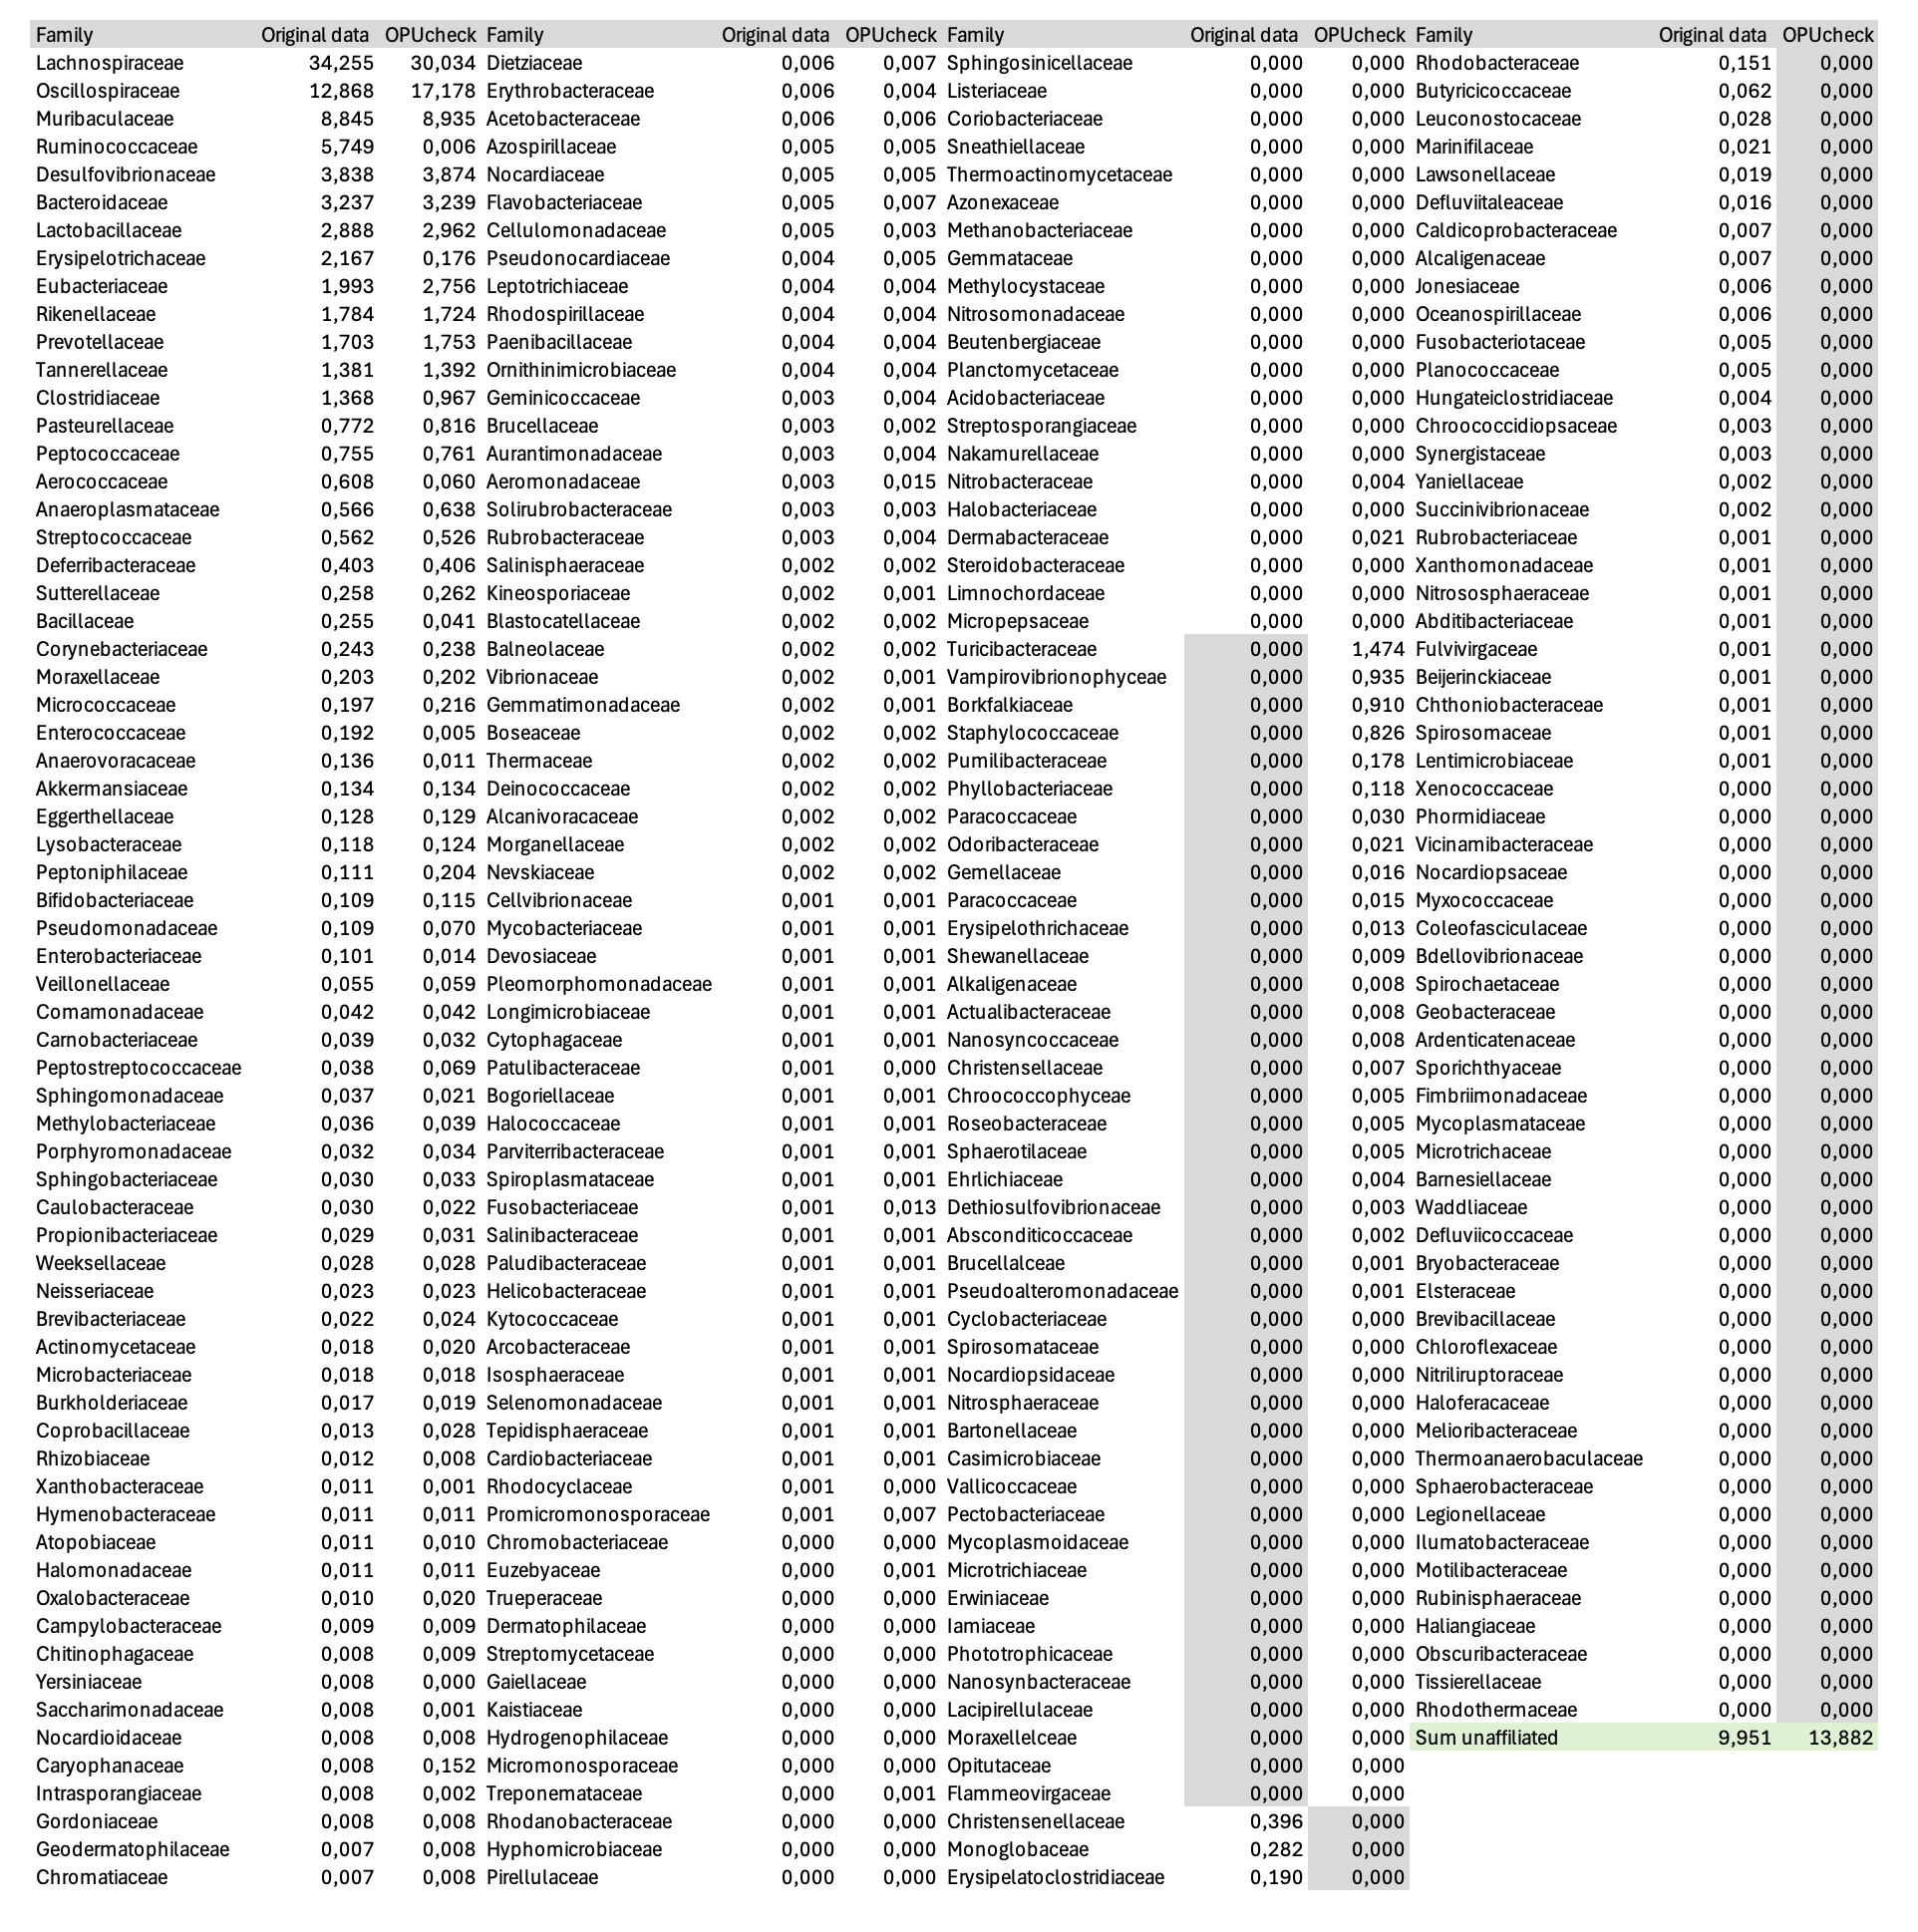


**Viver et al., 2023**

In this study, the sequences were also obtained using the Illumina platform, denoised and clustered into amplicon sequence variants (ASVs), and finally the OPUs were identified using the SILVA non-redundant database (release 138.1; SILVA database; Quast et al., 2013). In Viver et al., 2023, a total of 197 families were identified based on manual OPU delineation, whereas OPUcheck detected 207 families from the same dataset. The overall family-level relative abundance profiles were highly consistent between both approaches. In both analyses, *Lactobacillaceae* dominated the community, accounting for 73.87% of the total relative abundance in the manual approach and 73.73% using OPUcheck.

The second most abundant families in the manual approach were *Rhodobacteraceae* (6.01%) and *Stappiaceae* (4.11%). Using OPUcheck, *Stappiaceae* was recovered at a comparable relative abundance (4.05%); however, sequences previously assigned to *Rhodobacteraceae* were largely reclassified, resulting in a negligible relative abundance for this family (0.0005%) and a corresponding detection of *Roseobacteraceae* at 5.32%. Notably, *Rhodobacteraceae* and *Roseobacteraceae* both belong to the order *Rhodobacterales*, and differences in database sequence composition can lead to alternative family-level assignments.

Other moderately abundant families showed very similar proportions between methods, including *Vibrionaceae* (1.06% vs. 0.67%), *Staphylococcaceae* (0.69% vs. 0.63%), *Bacillaceae* (0.43% vs. 0.42%), *Micrococcaceae* (0.43% vs. 0.40%), *Rhizobiaceae* (0.90% vs. 0.07%), and *Legionellaceae* (0.52% vs. 0.14%). *Leuconostocaceae* was detected at low abundance in the manual dataset (0.44%) but was not recovered by OPUcheck. Additionally, families with relative abundances below 0.4% collectively represented 6% of the community in the manual
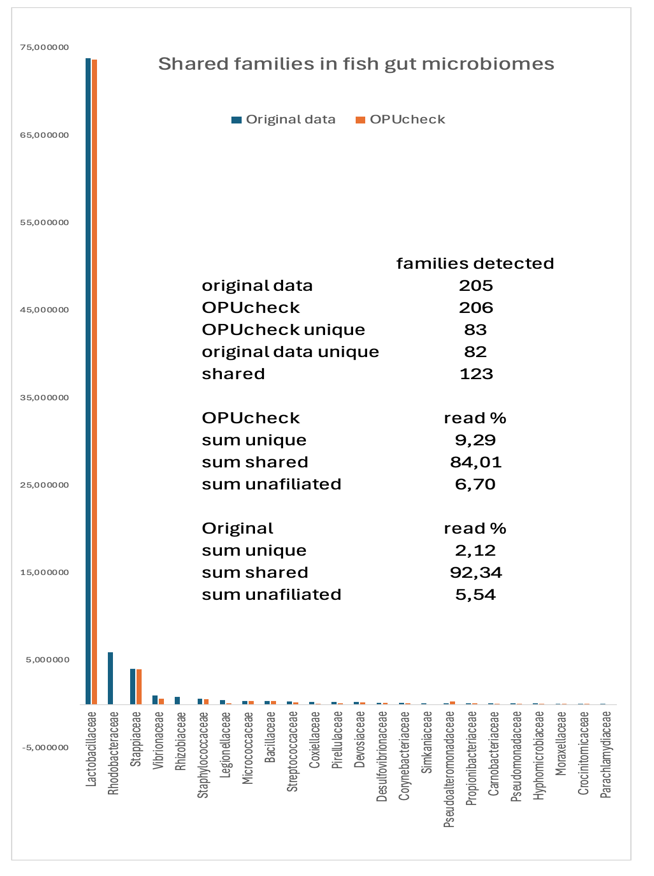
approach and 11.16% with OPUcheck.

The proportion of sequences assigned to species within unclassified families was also comparable (5.54% vs. 6.70%). The results between our original analyses performing the OPU assignation by manually inspecting the tree and the current based on our OPUcheck tool rendered again highly similar results for most of the taxa detected. The shared taxa detected covered between ~84-92% of the total read abundance, and only between ~2-9% of the reads had been assigned to different families. With some minor differences, the yields at the family level could be considered nearly identical.


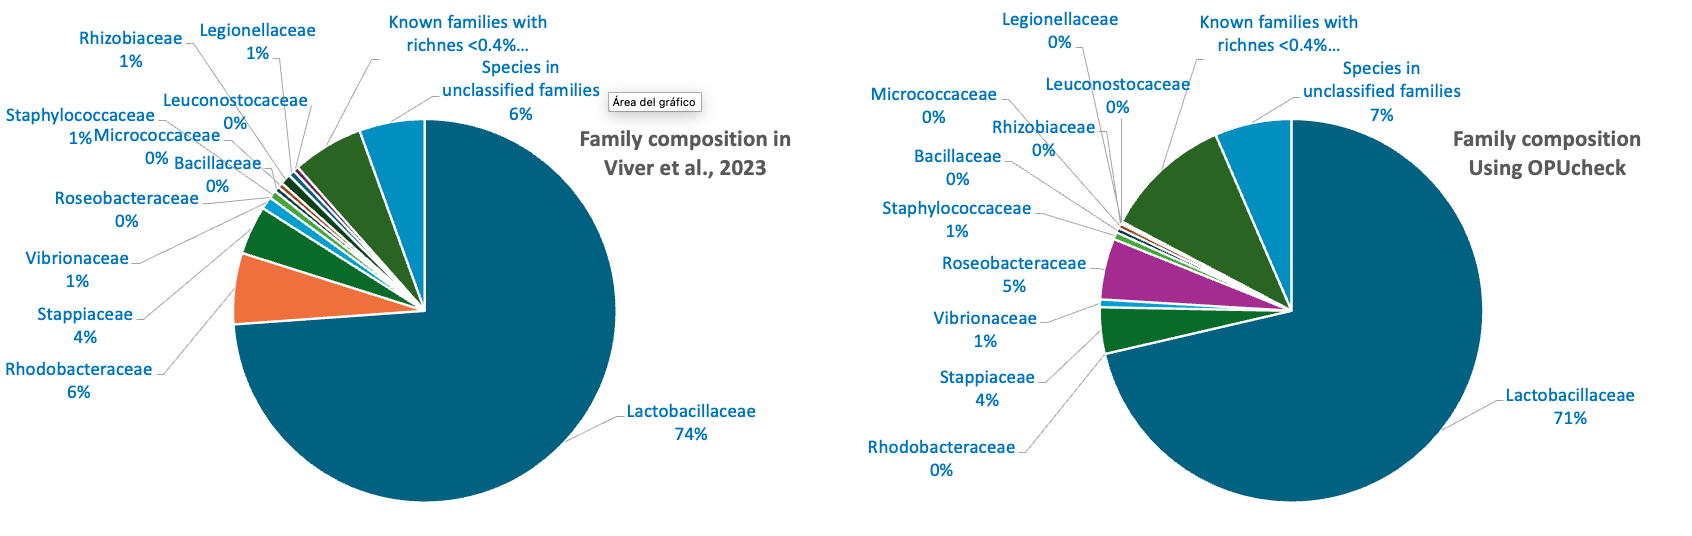


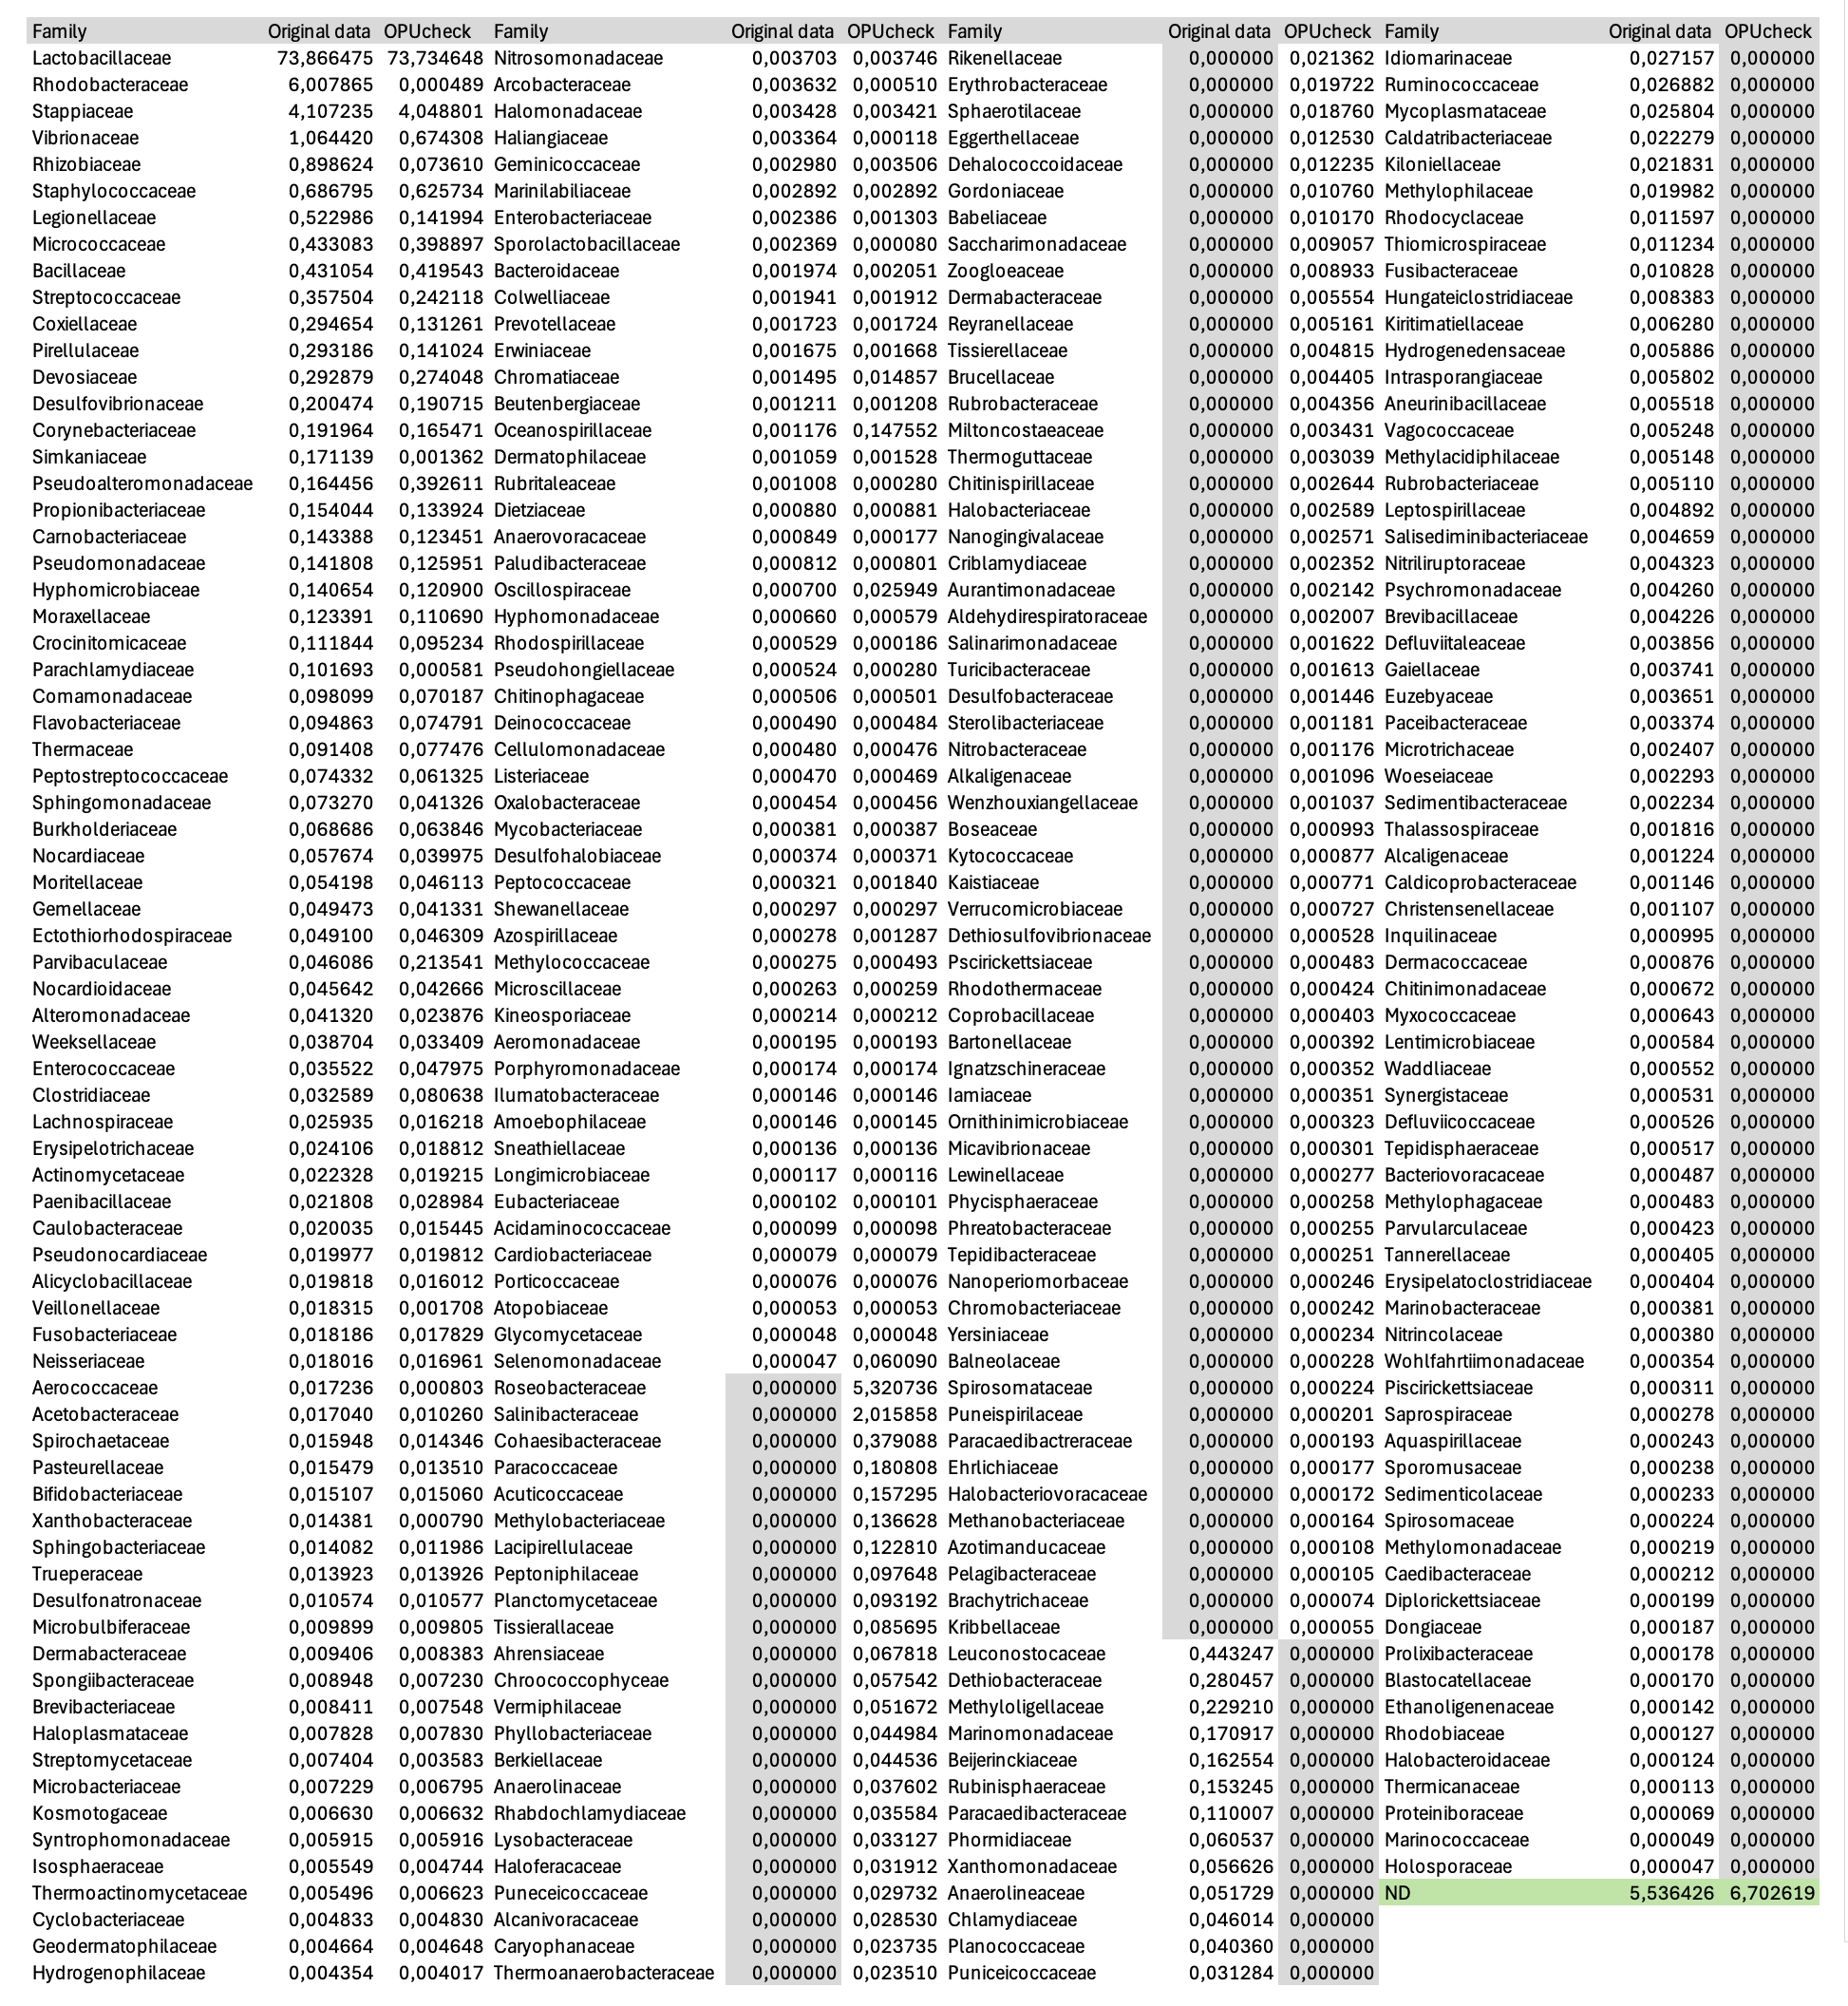


**Font et al., 2021**

In this study, the sequences were also obtained using the Illumina platform, denoised and clustered into amplicon sequence variants (ASVs), and finally the OPUs were identified using the SILVA non-redundant database (release 138.1; SILVA database; Quast et al., 2013). The manual supervision identified a total of 221 families, whereas OPUcheck recovered 217 families from the same dataset. Despite this slight difference in richness, the overall community structure was broadly consistent between both approaches. A substantial proportion of sequences was assigned to species belonging to unclassified families, representing 43.36% of the community in the original manuscript and 65.06% with OPUcheck. Among classified families, *Bacillaceae* remained one of the most dominant groups in both approaches, showing comparable relative abundances (13.98% in the manual approach vs. 12.94% with OPUcheck). *Marinilabiliaceae*, which was abundant in the original classification (10.74%), was nearly absent in the OPUcheck results (0.01%), while *Halanaerobiaceae* showed similar abundance (7.51% vs. 6.74%). Regarding *Desulfobacteraceae*, the manual OPU approach showed 6.43% vs. 1.53% recovered using the OPUcheck pipeline.


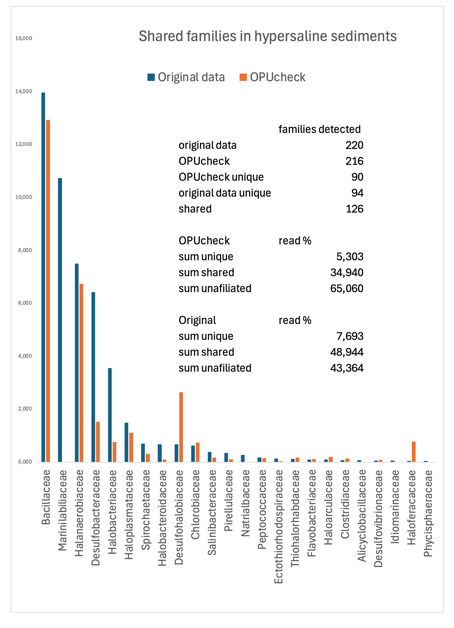
*Halobacteriaceae* also displayed a decrease, dropping from 3.56% in the manual analysis to 0.77% with OPUcheck. Several families detected in Font‑Verdera et al., 2023 (such as *Christensenellaceae* (2.49%), *Brocadiaceae* (2.36%), and others) were not recovered in the OPUcheck output. Conversely, OPUcheck identified families that were absent from the manual approach, including *Vermiphilaceae* (1.35%), *Methanonatronarchaceae* (1.04%), and *Haloferacaceae* (0.78%). Additional families with relative abundances below 1% collectively accounted for 22.92% of the community in the original study, compared with 6.03% when using the OPUcheck pipeline.

Similarly with the previous studies based on OPUs, the results here were in a great agreement excepting for some families. The shared taxa detected covered between ~35-49% of the total read abundance, and only between ~5-8% of the reads had been assigned to different families. The unaffiliated reads to known families responded to a range between 35 to 65% of the total sequences.


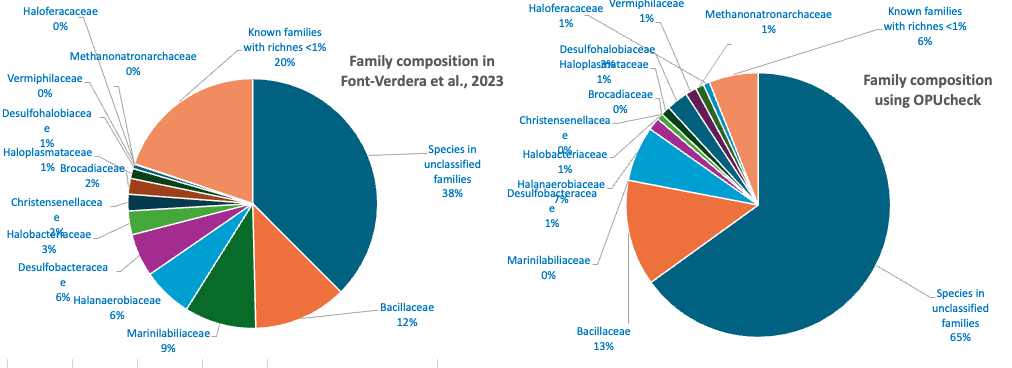


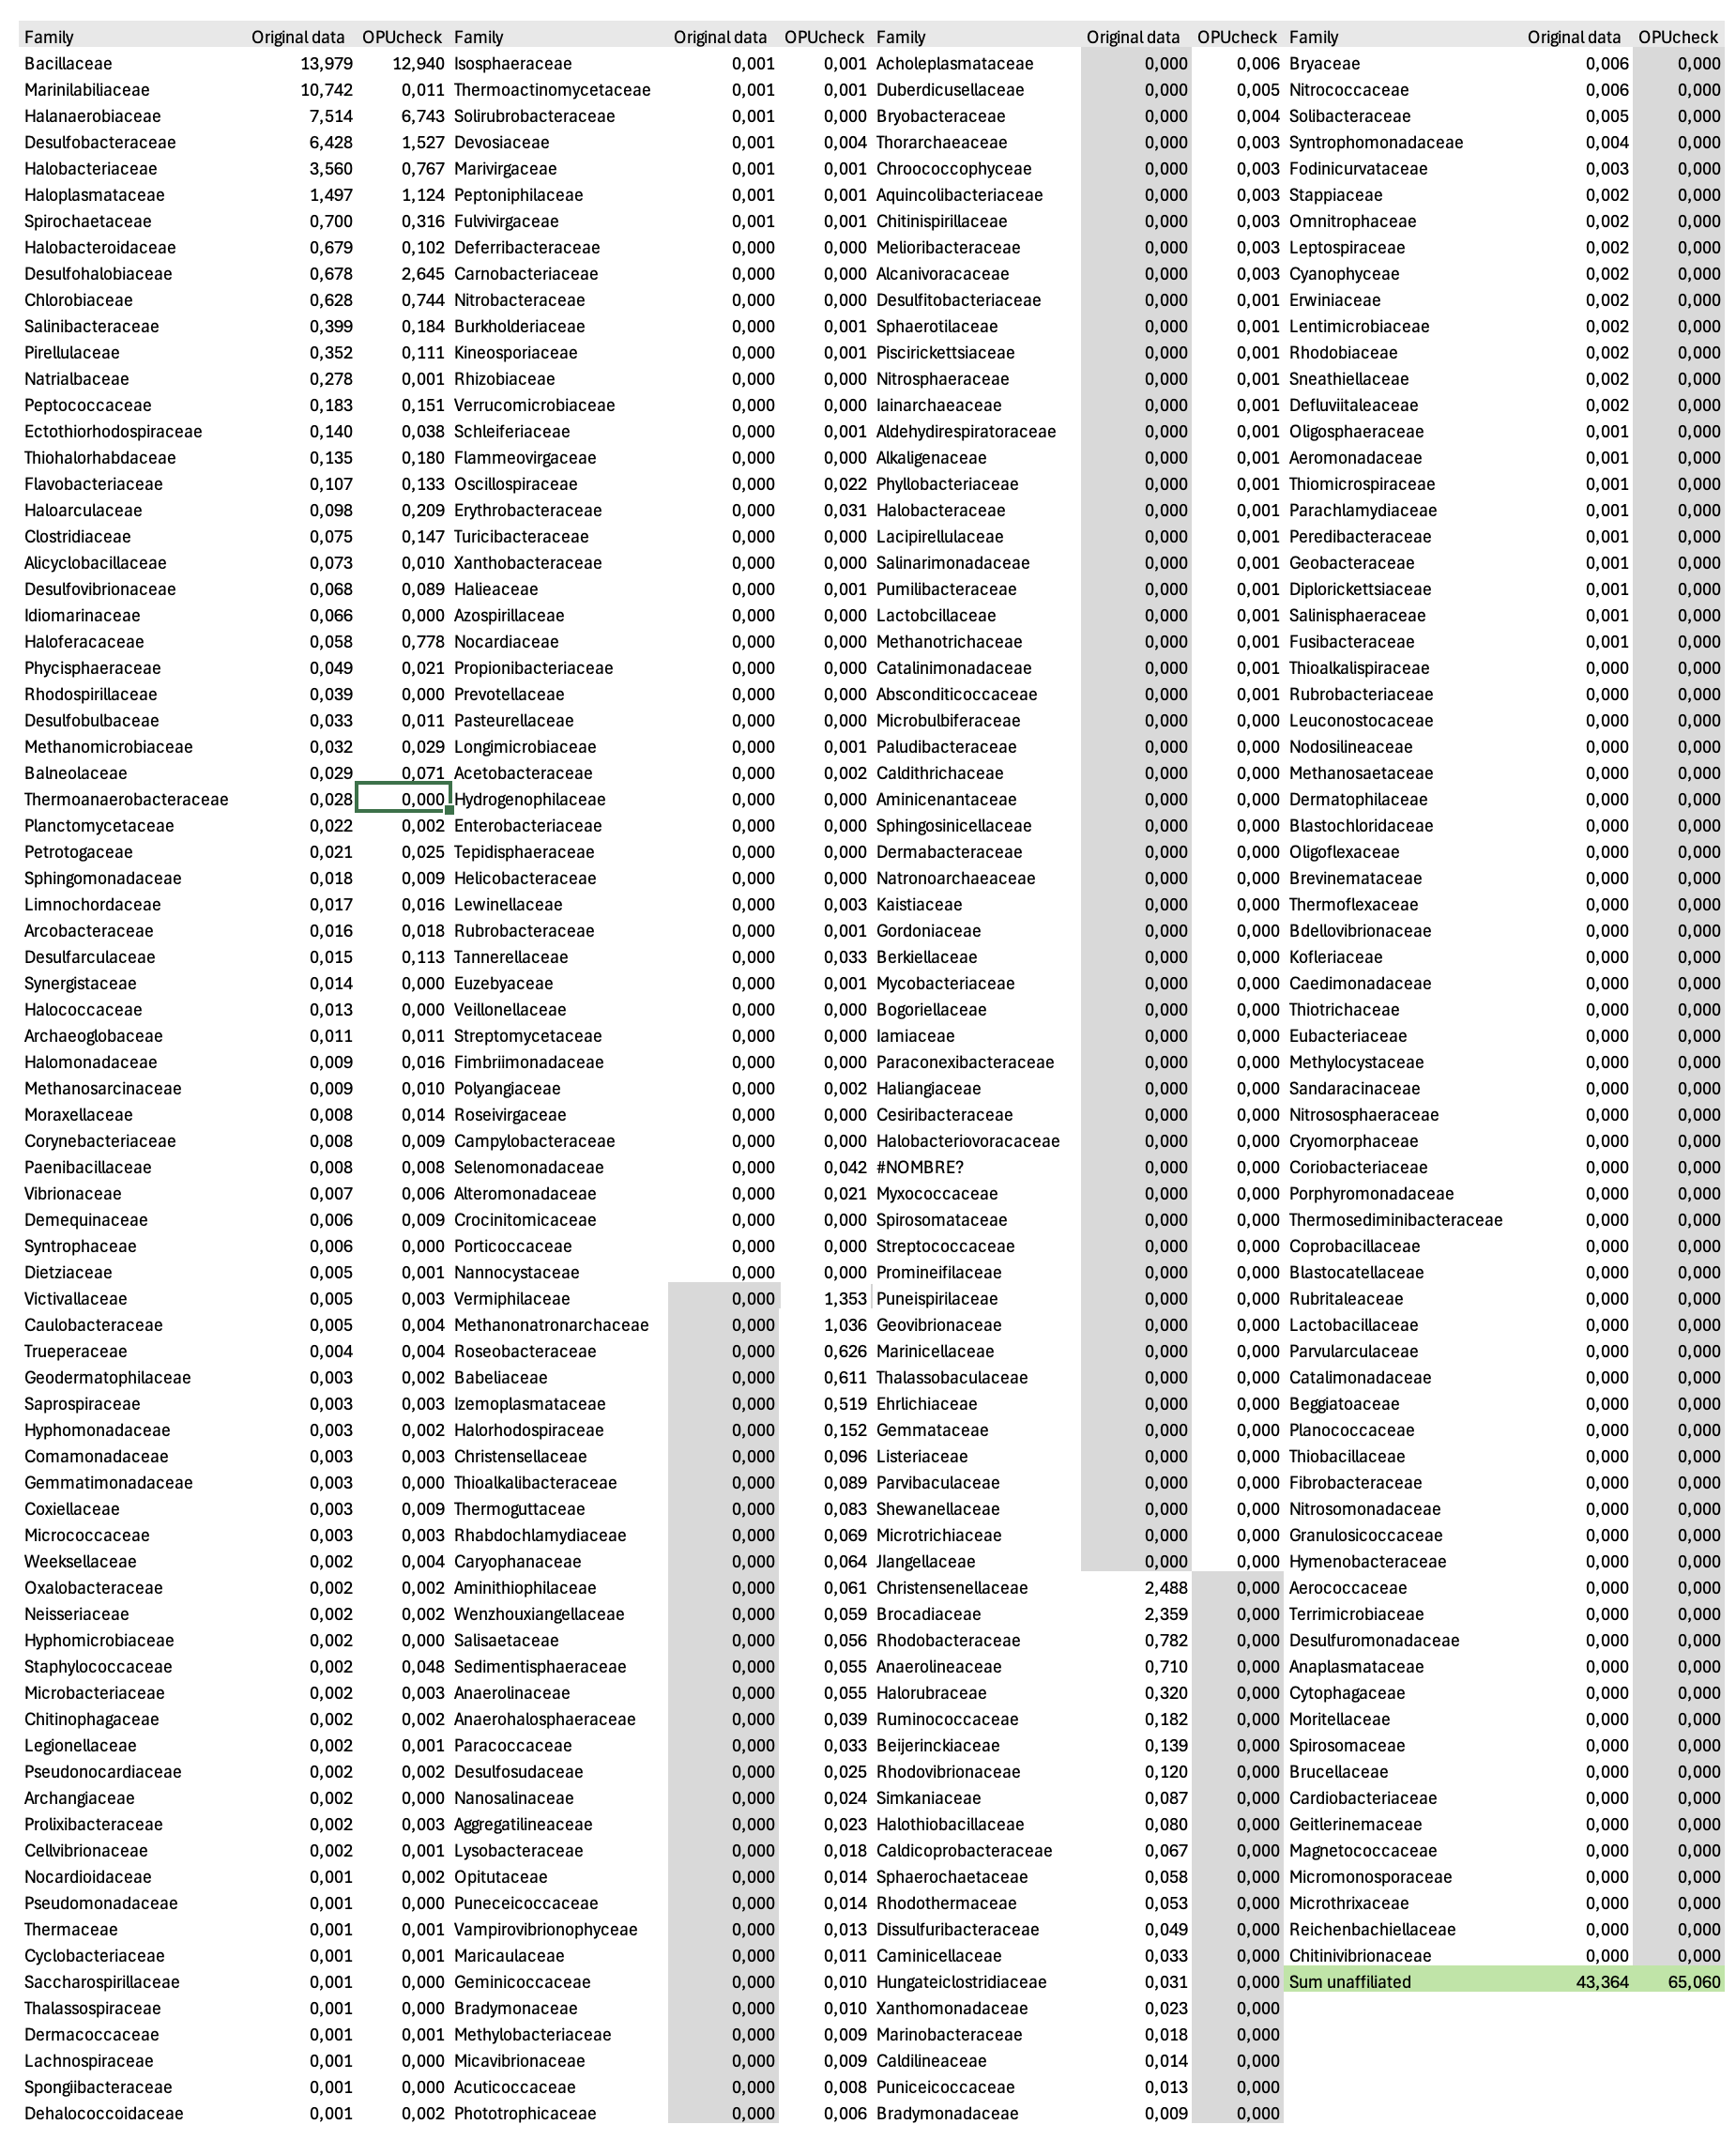


**Glasl et al., 2024**

The manuscript reports different microbiomes between adult and larvae of marine sponges. The results below reproduce the ones reported in the manuscript in their Figure 1B showing *Thermoproteota, Pseudomonadota Acidobacterota* and *Chloroflexota* showing the relevant differences.

**Heritier-Robbins et al., 2021**

The manuscript does not report any taxonomic affiliation in the main text, nor in the supplementary material, therefore we cannot compare the taxonomic affiliation yields. Here we report the read abundance within each family detected for the whole sequenced dataset. The number of OPUs (species) detected was 2666, among which 1508 species did not affiliate within any classified family, 762 species affiliated within 180 families with <25 different species (median =3) and 7 families were represented by 427 species (median = 55) making 16% of the total richness.

**Miksch et al., 2021**

The comparison between the published results and our analyses using OPUcheck rendered similar results for the families detected in both surveys (summing between 20 -30% of the total amplicon reads). However, OPUcheck with the new DB and phylogenetic inference detected 4 to 5 fold more diversity at the familiy level than the use of the program dada2 with the database SSU 138 Ref NR99. The differences, especially in the non-shared families with high read representation (e.g. “*Microtrichaceae”* for the original analyses or “*Salibacteraceae”* or *Moritellaceae* in our survey), could be due to differences in the alignment quality, implementation in the LTPlus of the GTDB-Tk taxonomy and differences in the identity inference.

Amplicon survey Svalbard sediments: The OPUcheck analysis showed similar results for the families capturing the majority of the reads, but important discrepancies in the low abundant families. Both approaches showed similar values of unaffiliated reads from known families (~55%). However, under the OPUcheck approach the number of families detected was 149 whereas the original data just 30. Only 17 families were shared between approaches, but showed similar trends. In grey shaded the families reciprocally not detected are highlighted.


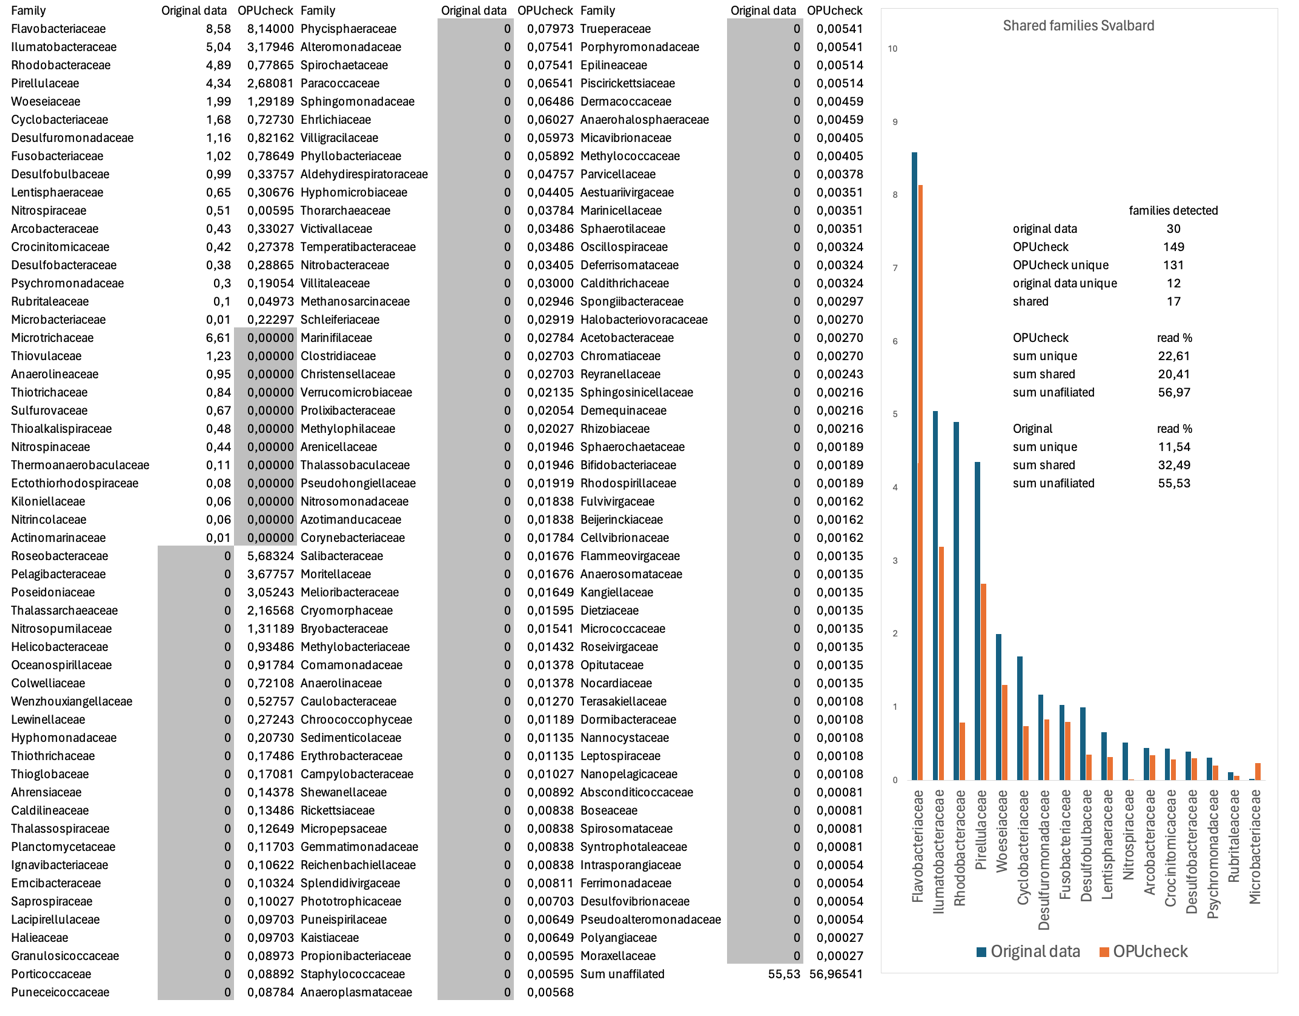


Amplicon survey Helgoland sand:

The OPUcheck analysis showed similar results for the families capturing the majority of the reads, but important discrepancies in the low abundant families. While 84.5% of the reads appeared unaffiliated from known families, only 52.2% occurred under our approach. In grey shaded the families reciprocally not detected are highlighted.

**
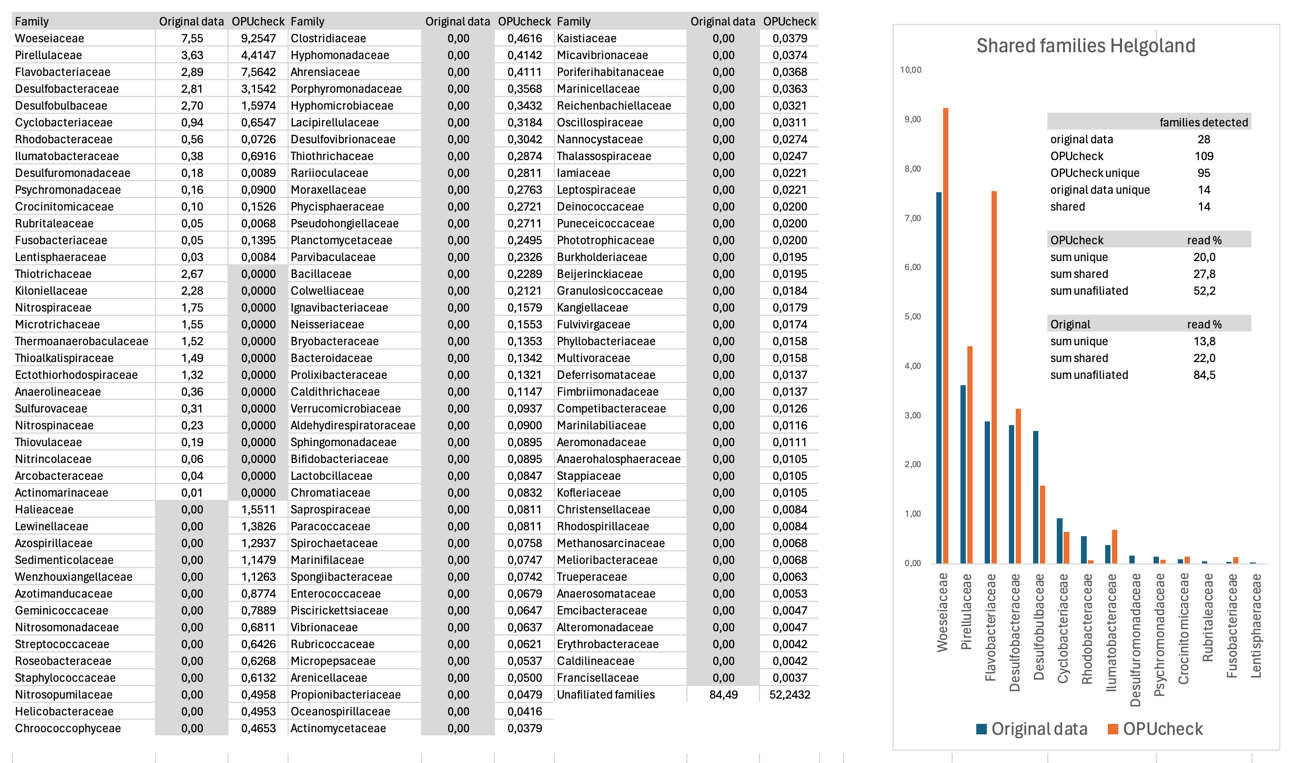
**

**Maritan et al., 2025**

All amplicon datasets were pooled in a single one to generate the ASVs and then, given the large amount of different ASVs generated, two subsampling of 7000 sequences each had been used to be included in the OPUcheck. Our results reproduce the main tendencies at the phylum level given in the Maritan et. al 2005 figure 2B in where the major phyla detected in decreasing abundances were *Pseudomonadota > Bacteroidota >Cyanobacteria > Desulfobacterota > Planctomycetota*. In our case, the Planctomycetota was the second most represented phylum in the dataset with 1279 ASVs (763 OPUs) out of which, 377 ASVs (215 OPUs) were of the family *Pirellulaceae*. As one of the families discarded as potential amplicon contaminants were the family *Pirellulaceae* (Supplementary Table 3 in Maritan et al., 2025), we cannot discard that the removal of the 215 *Pirellulaceae* OPUs out of the 3959 total detected could reduce the relevance of this phylum in the final composition despite there are still 548 OPUs of the phylum that may not be discarded. However, and despite we could not access the ASV tables, our results seem to agree with the ones published.

**Biada et al., 2025**

The results of the OPUcheck were in a general accordance with the main results shown in their Figure 1. However, the assignment of reads to some families are discrepant with our assignation based on phylogenetic inference. The major composition on the three major families *Oscillospiraceae, Lachnospiraceae* and *Eubacteriaceae*, despite some differences in our read counts show close patterns.


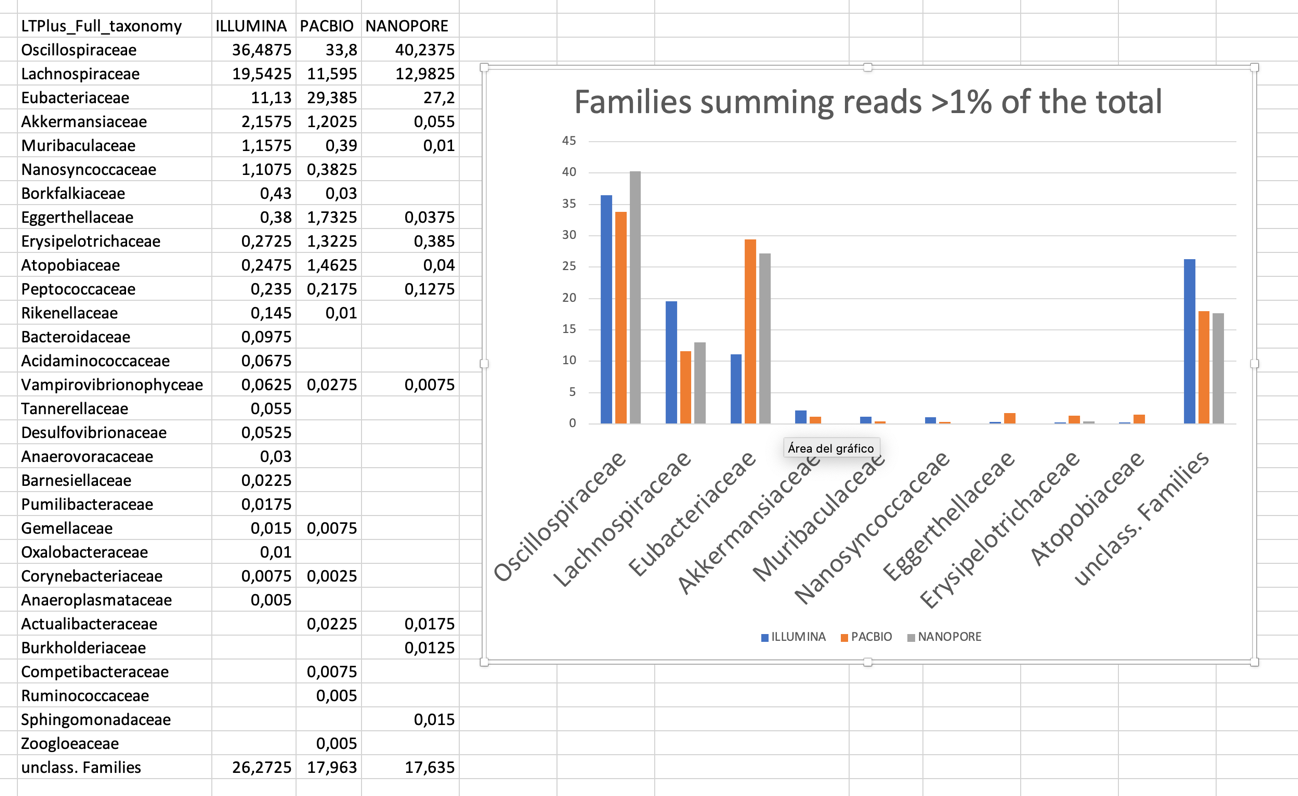


**Anderson et al., 2025**

The results of the OPUcheck were in a general accordance with the main results shown in their manuscript. In the one hand, the major phyla shown in their Figure 3A followed a similar trend in all three analyses: Illumina (A) and two subsampling analyses on 10000 sequences retrieved from the PacBio data (B & D). Similar trends were obtained at the OPU level (D). The trends in the representative ASVs used to calculate are similar, but in our case the OPUcheck discarded larger number given their lack of adequacy for the inference in accordance with our criteria (PacBio: original 10,480 ASVs, OPUcheck ~8900; Illumina 6507 ASVs, OPUcheck 5182). In general, using the OPUcheck approach both platforms sem to show similar results on the most abundant taxa.

| **A**  **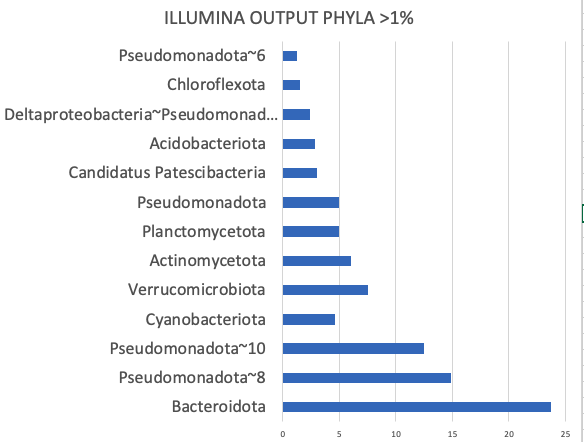** | **C**  **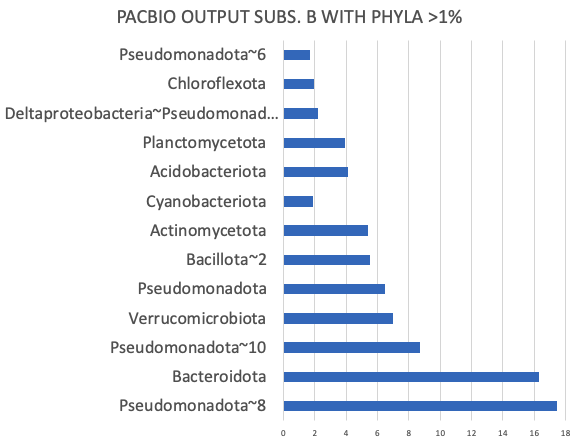** |
| --- | --- |
| **B**  **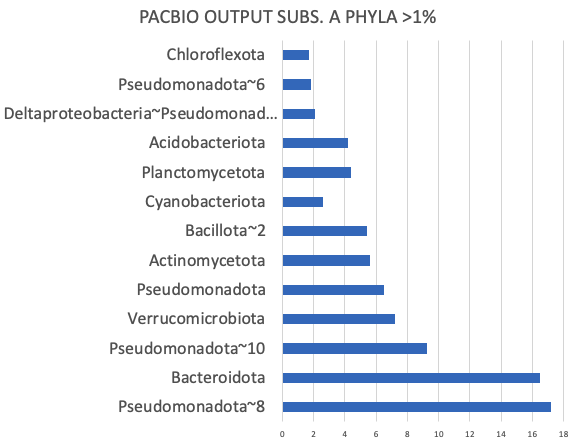** | **D**  Top most abundant OPUs in the two platforms, for time-efficiency we performed 2 subsampling of the PacBio results which resulted in nearly identical values  **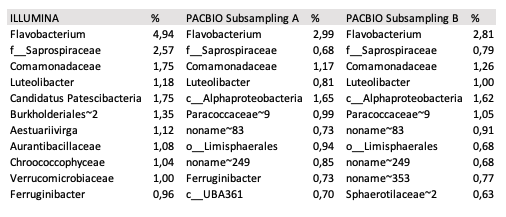** |

**Ivulic et al., 2022**

In this study, the sequences were also obtained using the PacBio platform, denoised and clustered into amplicon sequence variants (ASVs), and finally the OPUs were identified using the SILVA non-redundant database (release 138.1; SILVA database; Quast et al., 2013). To evaluate the consistency between manual OPU delineation and automated classification, we compared the family‑level taxonomic profiles reported by Ivulic et al., 2022 with those obtained using the OPUcheck pipeline. The manual analysis identified 88 families, whereas OPUcheck recovered 86 families from the same dataset, indicating a similar level of detected richness across approaches. Overall, the relative abundance profiles of the dominant bacterial families were highly concordant. *Enterobacteriaceae* and *Pasteurellaceae* remained the most abundant taxa in both workflows, with nearly identical proportions between the two methods (21.30% vs. 21.42% and 14.76% vs. 14.76%, respectively). Likewise, several other common families, including *Staphylococcaceae* (8.85% vs. 8.87%), *Lactobacillaceae* (7.27% vs. 7.32%), *Streptococcaceae* (5.17% vs. 5.19%), *Oxalobacteraceae* (5.09% vs. 5.09%), and *Erysipelatoclostridiaceae* (3.07% vs. 1.40%) showed minimal differences between classifications. Minor shifts were observed in families of intermediate abundance. *Corynebacteriaceae* decreased from 4.58% in the original dataset to 3.32% in OPUcheck, whereas *Sphingomonadaceae* remained stable (4.37% vs. 4.33%). Also, *Oscillospiraceae* and *Lachnospiraceae* showed similar abundances (1.29% to 2.09% and 0.51% to 1.69%, respectively). The proportion of sequences assigned to species within unclassified families was similar between methods (12.45% vs. 12.74%). Families with relative abundances below 1% contributed 7.67% of the community in the manual analysis compared with 9.89% in the OPUcheck dataset.

The results between our original analyses performing the OPU assignation by manually inspecting the tree and the current based on our OPUcheck tool rendered again highly similar results for most of the taxa detected. Here, the amplicon sequences were obtained using PacBio platform that affiliates sequences with higher accuracy given the length of the amplified stretch. The shared taxa detected covered between ~84% of the total read abundance, and only between ~3-4% of the reads had been assigned to different families. With some minor differences, the yields at the family level could be considered nearly identical.

**
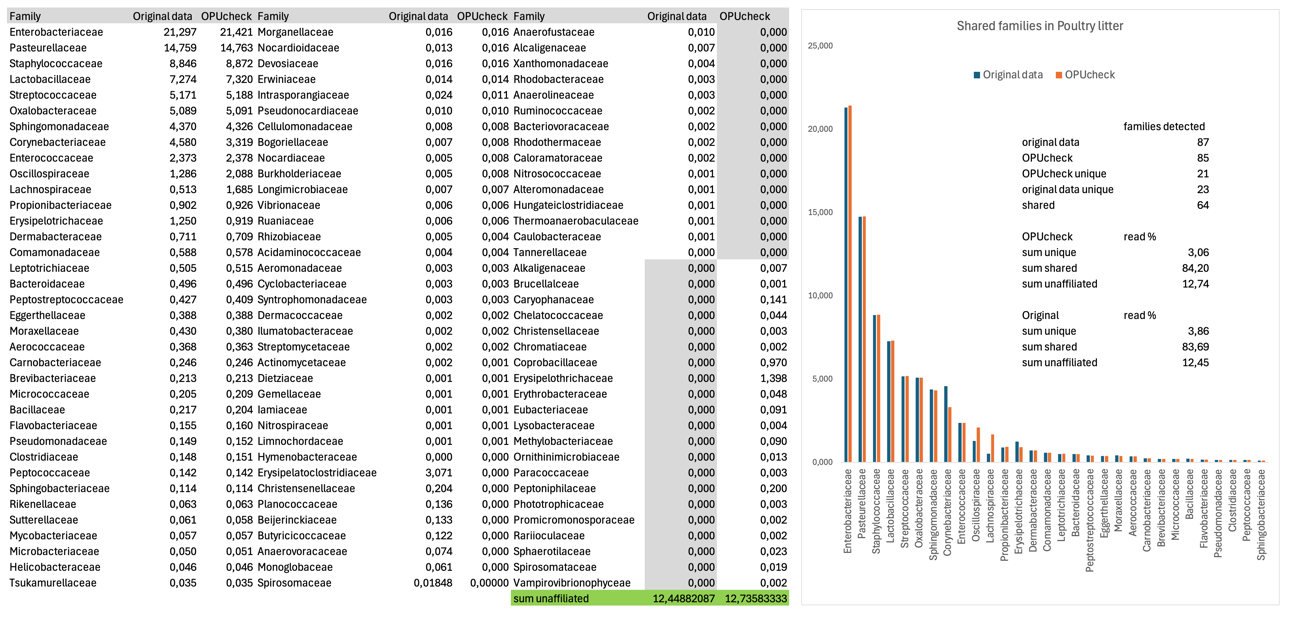
**


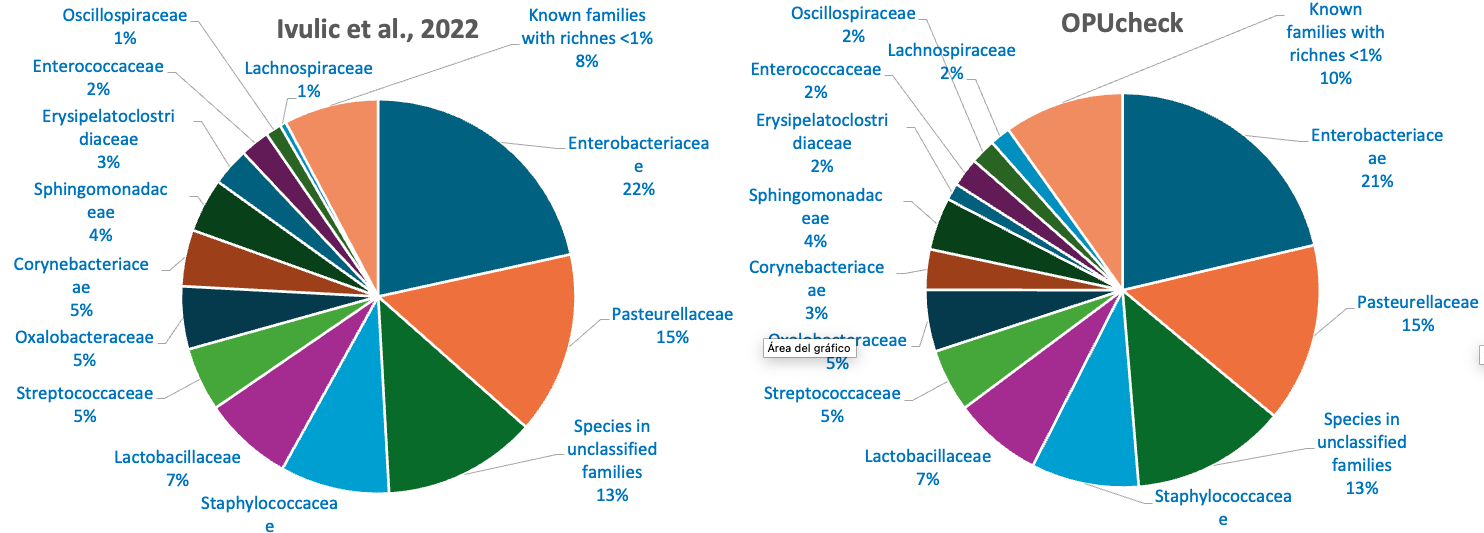


**Veselovsky et al., 2025**

In this study we compared 2 subsets of each dataset generated with the three platforms Illumina, PacBio and Oxford Nanopore. Derived from our results based on the OPUcheck at the family level, we could observe that Illumina was the platform with higher resolution in family diversity, detecting OTUs inserted within a total of 200 distinct families, whereas the long-read platforms yielded 37% to 20% less families. These results can be a product of either the lower detection of low abundant taxa, or the lack of amplification of these taxa due to primer constrains. Also, both long-read platforms yielded a large number of sequences (~8.5%) that originated from eukaryotes, whereas Illumina primers did not amplify any eukaryotic rRNA. All three platforms yielded similar numbers of OTUs affiliating with unknown families. When comparing the results at the family level, the greatest proportion of the common families were shared among the three platforms indicating a great coherence of the amplicon identification, and the platform-unique are reflecting the distinct accuracies or imprecisions when amplifying the gene sequences.

| | **Families** | Illumina | PacBio | Nanopore | | --- | --- | --- | --- | | *Arenimicrobiaceae* | 2.48 | - | 0.01 | | *Bacillaceae* | 5.25 | 13.47 | 23.15 | | *Blastocatellaceae* | 1.24 | 0.00 | 0.04 | | *Bryobacteraceae* | 2.02 | 0.14 | 0.02 | | *Caryophanaceae* | 0.61 | 1.50 | 1.96 | | *Chitinophagaceae* | 1.73 | - | - | | *Gaiellaceae* | 1.40 | 0.24 | 2.19 | | *Geminicoccaceae* | 1.18 | 0.17 | 0.05 | | *Lysobacteraceae* | 0.50 | 0.20 | 0.89 | | *Methylobacteriaceae* | 1.04 | 0.43 | 0.34 | | *Micrococcaceae* | 1.03 | 0.31 | 0.80 | | *Micromonosporaceae* | 1.07 | 0.12 | 0.03 | | *Nitrobacteraceae* | 2.28 | 0.17 | 0.20 | | *Nocardioidaceae* | 1.40 | 0.49 | 0.03 | | *Oscillospiraceae* | - | 0.01 | 2.20 | | *Paenibacillaceae* | 0.68 | 1.06 | 2.86 | | *Peptococcaceae* | - | 11.71 | 7.37 | | *Propionibacteriaceae* | 0.02 | 4.06 | 0.48 | | *Rubrobacteraceae* | 1.57 | 0.01 | 0.05 | | *Sphingomonadaceae* | 3.31 | 0.70 | 0.48 | | *Steroidobacteraceae* | 0.67 | 0.32 | 0.78 | | Other known families | 22.98 | 6.66 | 6.95 | | Unaffilated families | 47.55 | 58.38 | 49.03 | |  |  |  |  | | **Nr families detected** | **217** | **195** | **149** | |  |  |  | | |  |  | 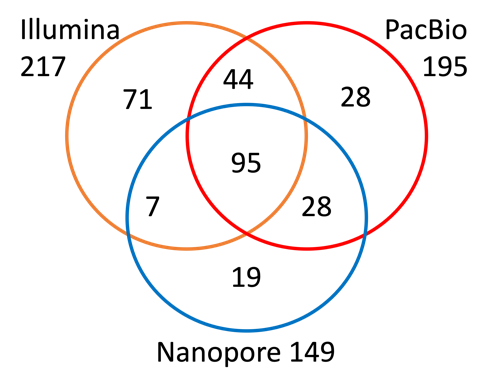 | | | Shared all platforms | 95 | | Shared Illumina & PacBio | 139 | | Shared Illumina & Nanopore | 102 | | Shared PacBio & Nanopore | 123 | | Illumina unique | 71 | | PacBio unique | 28 | | Nanopore unique | 19 | |  |  | |
| --- | --- | --- | --- | --- | --- | --- | --- | --- | --- | --- | --- | --- | --- | --- | --- | --- | --- | --- | --- | --- | --- | --- | --- | --- | --- | --- | --- | --- | --- | --- | --- | --- | --- | --- | --- | --- | --- | --- | --- | --- | --- | --- | --- | --- | --- | --- | --- | --- | --- | --- | --- | --- | --- | --- | --- | --- | --- | --- | --- | --- | --- | --- | --- | --- | --- | --- | --- | --- | --- | --- | --- | --- | --- | --- | --- | --- | --- | --- | --- | --- | --- | --- | --- | --- | --- | --- | --- | --- | --- | --- | --- | --- | --- | --- | --- | --- | --- | --- | --- | --- | --- | --- | --- | --- | --- | --- | --- | --- | --- | --- | --- | --- | --- | --- | --- | --- | --- | --- | --- | --- | --- | --- | --- | --- | --- | --- | --- | --- |

**Unpublished results**

In this section we report the results based on own amplicon sequences that had not been published yet but can be used as examples of the goodness of the OPUcheck approach.

| **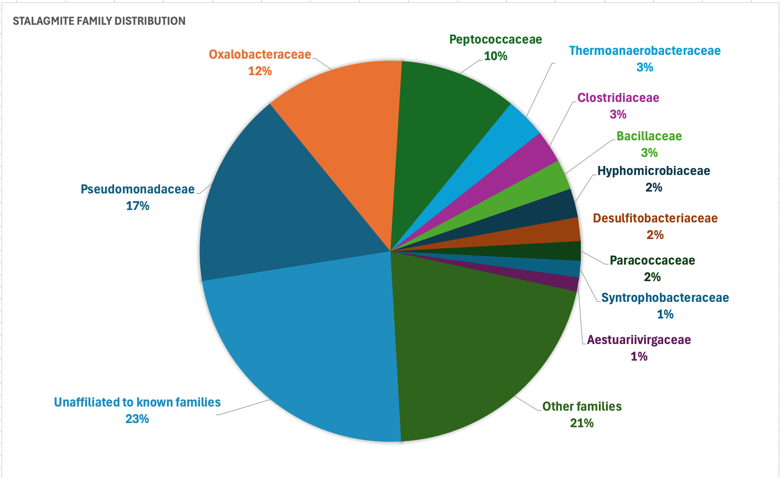** | **Stalagmite amplicon sequencing with Illumina platform:**  After trimming 1,111,332 amplicons were grouped in a total of 4114 ASVs which after the OPUcheck analysis rendered 2609 single OPUs (species) that represent an equal number of different putative species. These OPUs affiliated with 203 families, eleven of which summed >50% of the reads. |
| --- | --- |
| **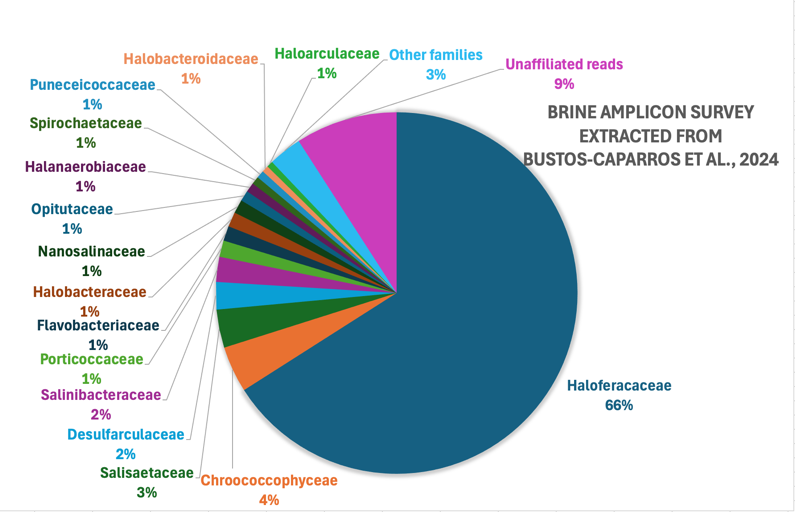** | **Brine amplicon sequencing with Illumina platform from samples taken from Bustos-Caparros et al., 2024:**  After trimming 4,240,232 amplicons were grouped in a total of 1401 ASVs which after the OPUcheck analysis rendered 648 single OPUs (species) that represent an equal number of different putative species. These OPUs affiliated with 35 families, 15 of which summed ~88% of the reads, and the single family *Haloferacaceae* >66% of the total reads. |
| **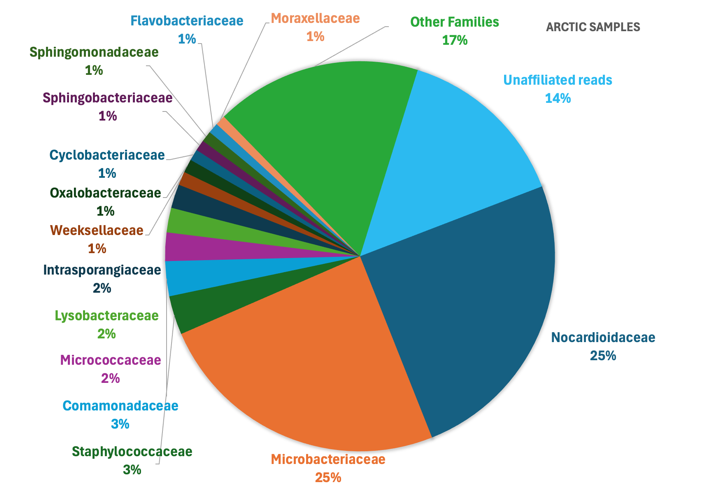** | **Amplicon sequencing with Illumina platform from arctic samples:**  After trimming 2,397,963 amplicons were grouped in a total of 5907 ASVs which after the OPUcheck analysis rendered 4036 single OPUs (species) that represent an equal number of different putative species. These OPUs affiliated with 277 families, 14 of which summed >68% of the reads. |

**Metagenome and read results**

In this section we report the results based on own metagenome read sequences of own published studies.

| **Brine 16S rRNA gene sequences extracted from metagenome reads of Bustos-Caparros et al., 2023:**  The reads from the metagenomes of Bustos-Caparros et al., 2023 were recruited and the representative ASVs were used to infer diversity using the OPUcheck. The 5,212,357 recruited reads were grouped in a total of 7,968 ASVs which after the OPUcheck analysis the 7250 retained ASVs rendered 2,662 single OPUs (species) that represent an equal number of different putative species. These OPUs affiliated with 159 families, 2 of which (*Haloferacaceae and Salilnibacteraceae*) summed >83% of the reads. The read length mean was 136 ±22 nucleotides and the median 148 nucleotides. If contigs are recruited, we obtained 1858 ASVs of which 1758 were retained ASVs and affiliated with 630 single OPUs or species. The contig length mean was 980 ±380 nucleotides and the median 919 nucleotides. |
| --- |
| Family distribution of the reads recruited from the raw metagenome sequence dataset and analyzed using the OPUcheck.  **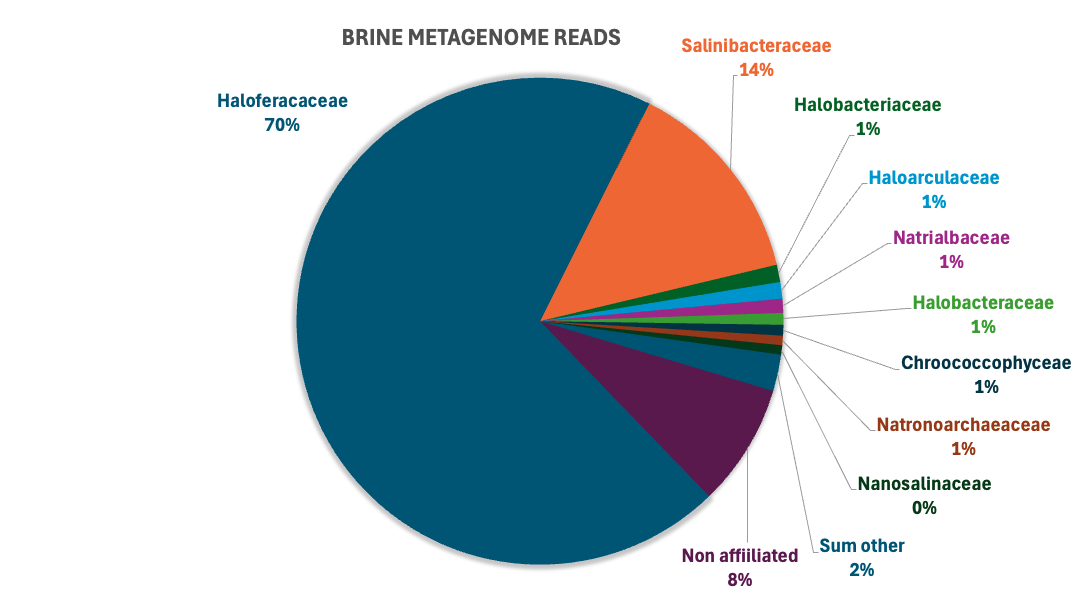** |
| Example of aligned reads in the universal alignment showing distinct positions in the 16S rRNA gene stretch. Highlighted in yellow are the full-length reference sequences with which the different reads affiliate. The read length mean was 136± 22 nucleotides and the median 148 nucleotides.  **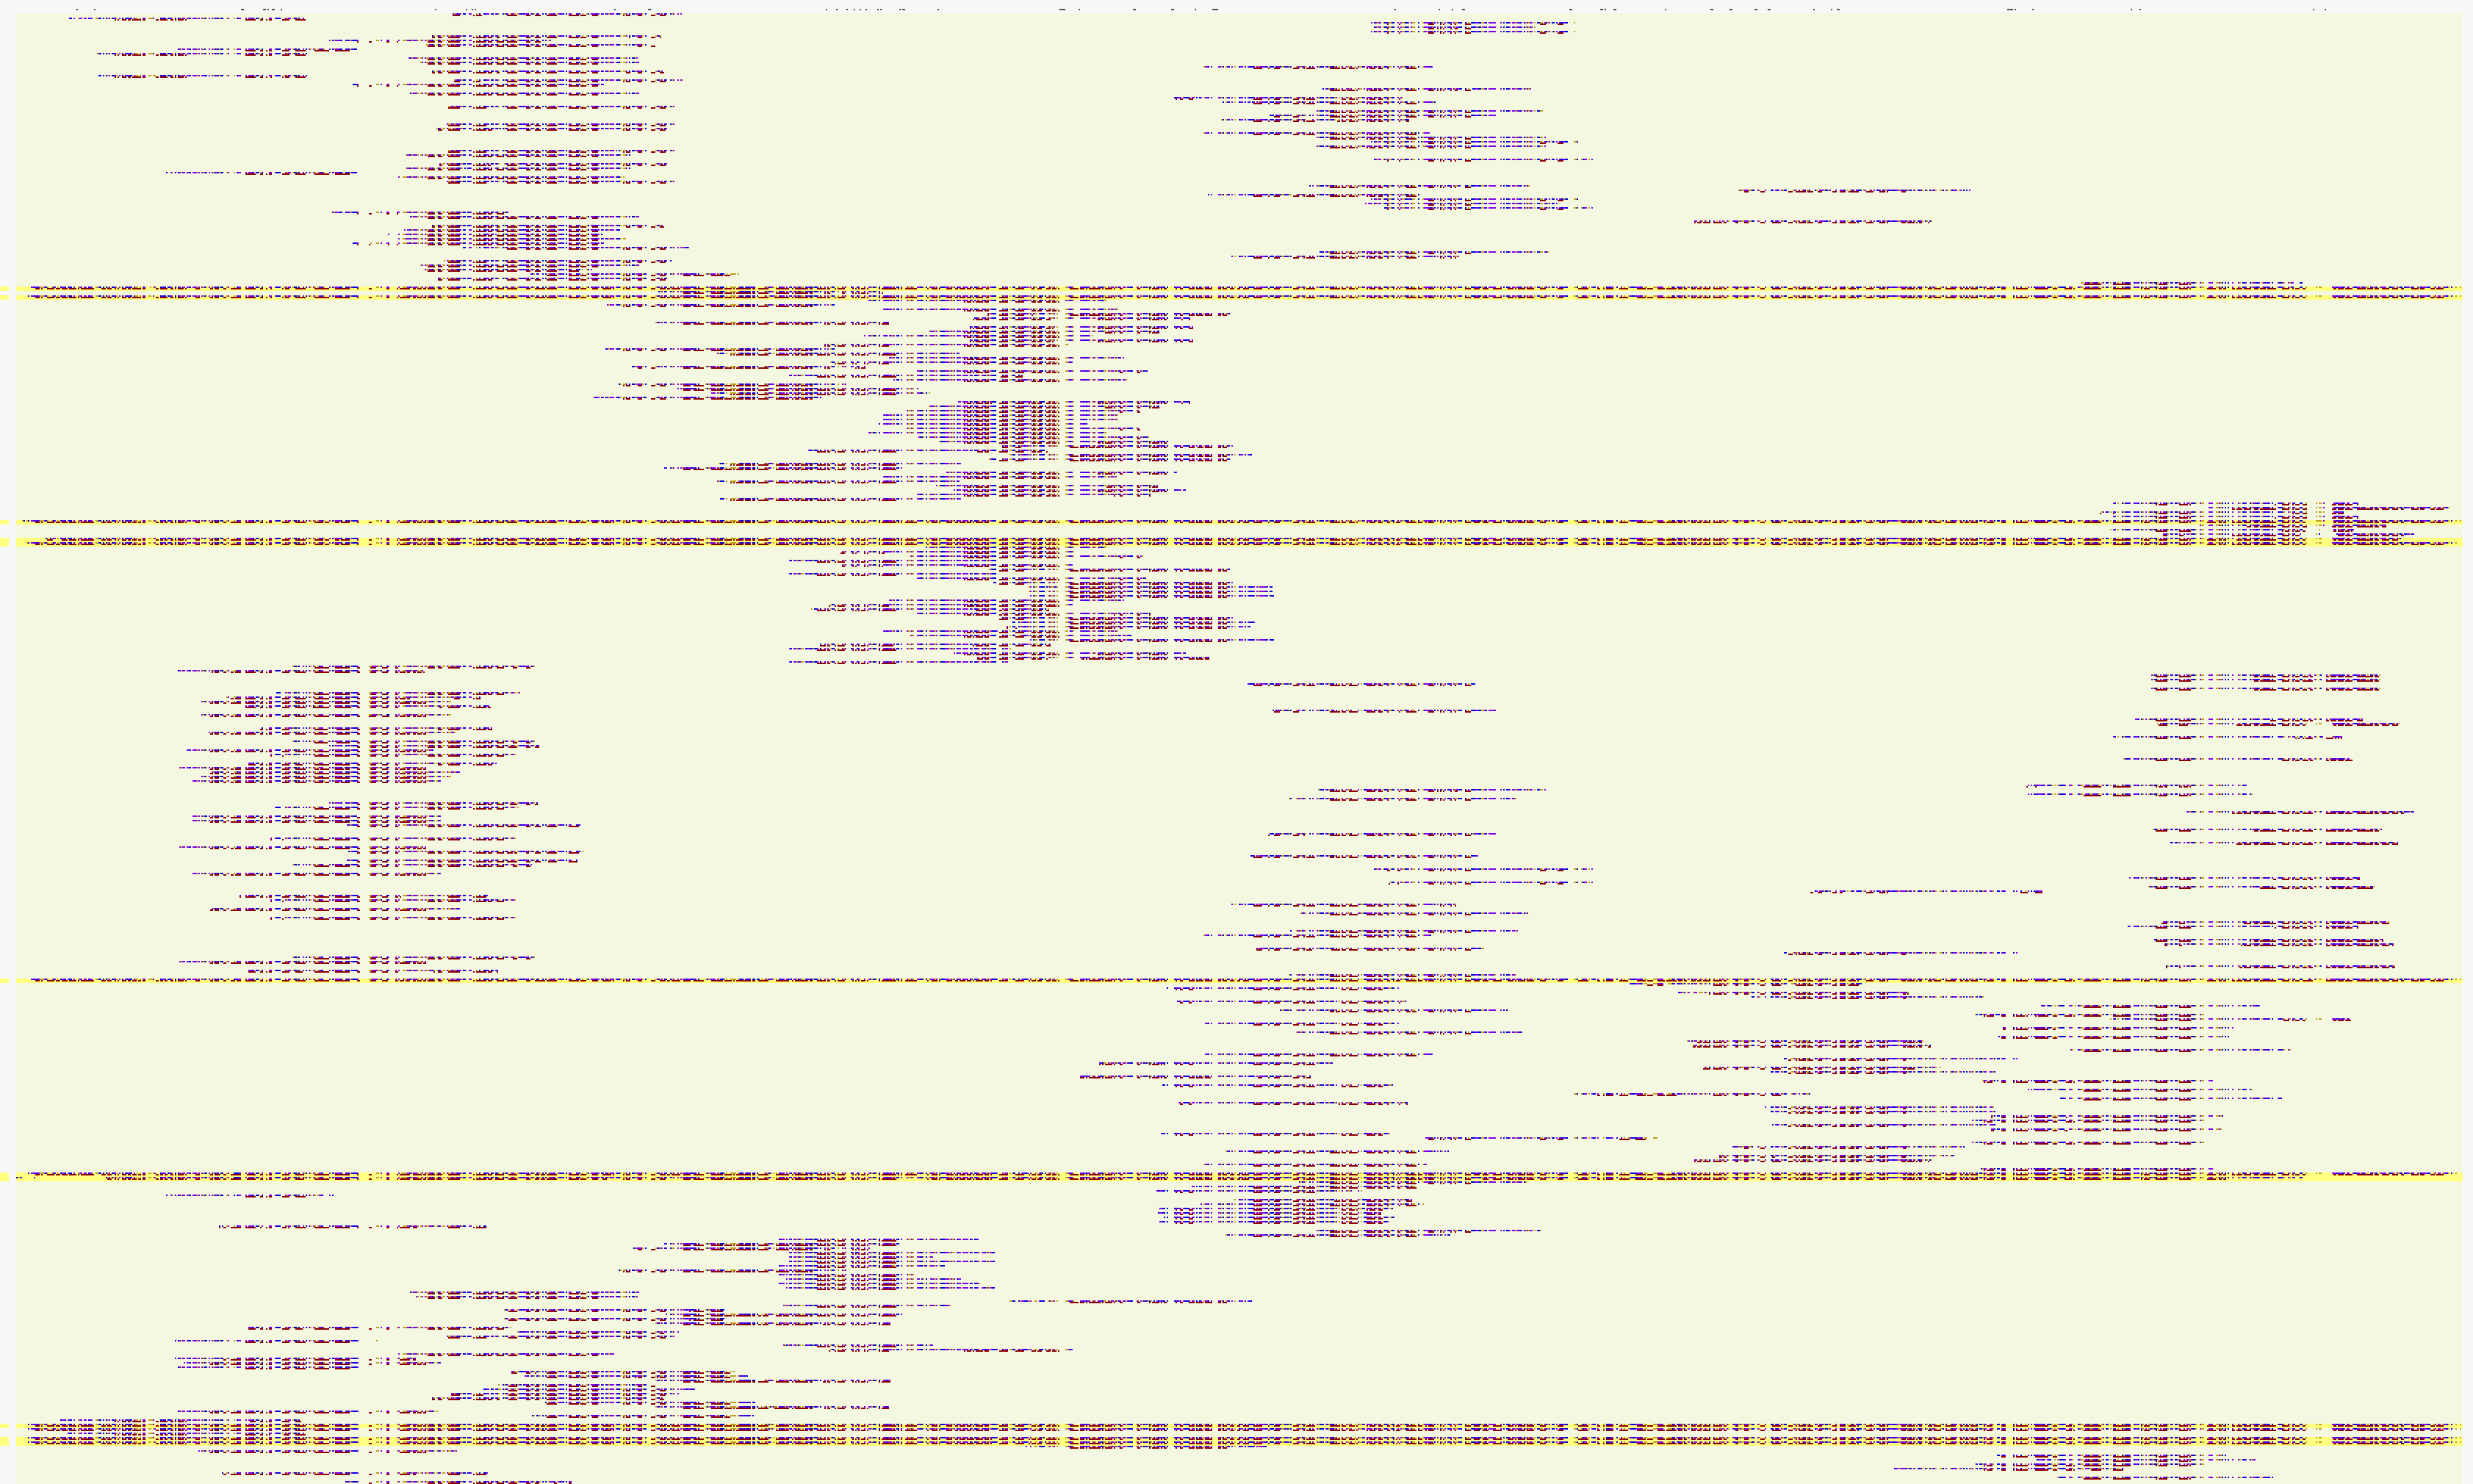** |

| **Brine 16S rRNA gene sequences extracted from metagenome reads unpublished surveys on brine analyses (González-Méndez, unpublished):**  The 2,446,550 recruited reads were grouped in a total of 4,289 ASVs which after the OPUcheck analysis rendered 1,436 single OPUs (species) that represent an equal number of different putative species. These OPUs affiliated with 92 families. If instead the raw reads, the contigs are recruited, we obtained 232 single ASVs which affiliated with 152 single OPUs or species. These OPUs affiliated with 40 families. Six families of the latter were not detected in the raw read analysis, but altogether the shared families summed ~86% of the total raw read recruited and ~76% of the contigs. In general, there was a good agreement between both datasets and the differences in identity could be due to the lower information content of the short length reads which affiliation could render dubious position inferences. |
| --- |
| **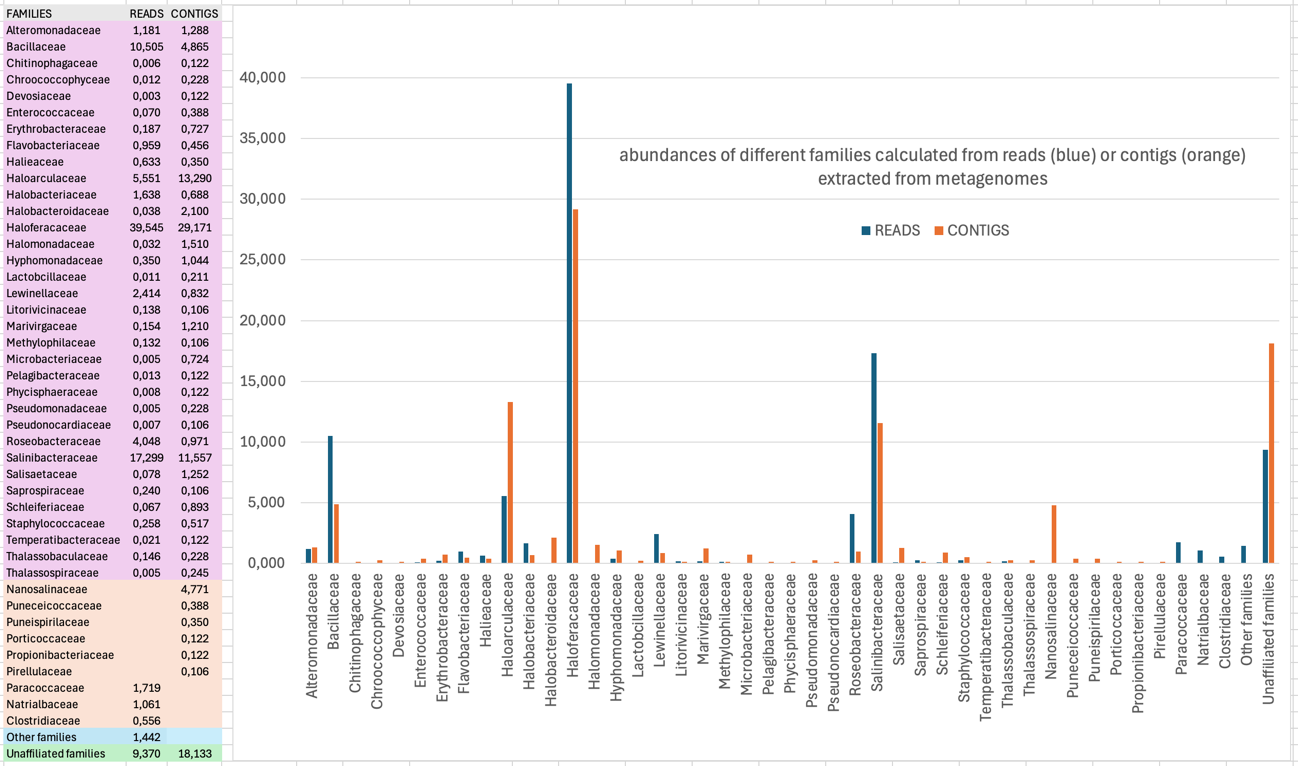** |

**Supplementary Table ST2:** list of SILVA_138.1_SSUREF_N99 and SILVA__138.2_SSUREF_N99 groups not represented

List of SILVA_138.1_SSUREF_N99 group names not represented in the LTPlus

**
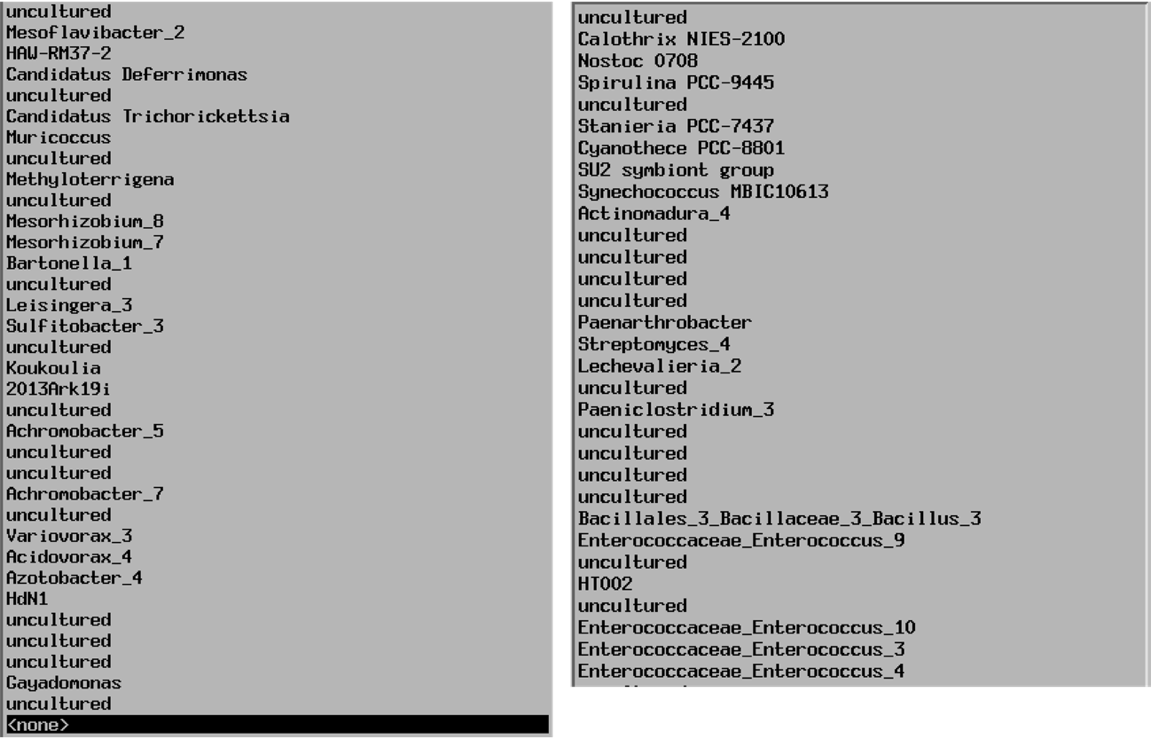
**

**Supplementary Table ST3:** Reference sequences of SILVA_138.1_SSUREF_N99 for the groups not represented in the LTPlus

List of sequences representative of the 65 groups in the latest SILVA database that did not qualify to remain in the LTPlus and therefore the groups that they represented remained excluded from the LTPlus selection:

| **Accesion Number** | **full_name** | **tax_slv** |
| --- | --- | --- |
| AB003166 | Spirulina subsalsa IAM M-223 | Bacteria;Cyanobacteria;Cyanobacteriia;Cyanobacteriales;Paraspirulinaceae;Spirulina PCC-9445 |
| KU230304 | Azotobacter salinestris | Bacteria;Proteobacteria;Gammaproteobacteria;Pseudomonadales;Pseudomonadaceae;Azotobacter |
| JN566022 | Streptomyces albulus | Bacteria;Actinobacteriota;Actinobacteria;Streptomycetales;Streptomycetaceae;Streptomyces |
| JN692281 | Azotobacter sp. Az15 | Bacteria;Proteobacteria;Gammaproteobacteria;Pseudomonadales;Pseudomonadaceae;Azotobacter |
| HG799101 | Halohasta sp. RDI82 | Archaea;Halobacterota;Halobacteria;Halobacterales;Haloferacaceae;uncultured |
| JQ659794 | Mesorhizobium sp. R5-794 | Bacteria;Proteobacteria;Alphaproteobacteria;Rhizobiales;Rhizobiaceae;Mesorhizobium |
| AJ582391 | Rhopalodia gibba | Bacteria;Cyanobacteria;Cyanobacteriia;Cyanobacteriales;Microcystaceae;SU2 symbiont group |
| JQ666178 | Ensifer meliloti | Bacteria;Proteobacteria;Alphaproteobacteria;Rhizobiales;Rhizobiaceae;Bartonella |
| AJ488505 | Roseomonas rosea | Bacteria;Proteobacteria;Alphaproteobacteria;Acetobacterales;Acetobacteraceae;Muricoccus |
| DQ869036 | Achromobacter sp. PW-1 | Bacteria;Proteobacteria;Gammaproteobacteria;Burkholderiales;Alcaligenaceae;Achromobacter |
| EU502866 | Streptomyces platensis | Bacteria;Actinobacteriota;Actinobacteria;Streptomycetales;Streptomycetaceae;Streptomyces |
| AB039008 | Stanieria cyanosphaera | Bacteria;Cyanobacteria;Cyanobacteriia;Cyanobacteriales;Xenococcaceae;Stanieria PCC-7437 |
| EU521701 | Streptomyces mycarofaciens | Bacteria;Actinobacteriota;Actinobacteria;Streptomycetales;Streptomycetaceae;Streptomyces |
| AJ936942 | marine alpha proteobacterium SOMBO1 | Bacteria;Proteobacteria;Alphaproteobacteria;Rhodobacterales;Rhodobacteraceae;Leisingera |
| JQ746428 | Achromobacter xylosoxidans | Bacteria;Proteobacteria;Gammaproteobacteria;Burkholderiales;Alcaligenaceae;Achromobacter |
| JQ746486 | Achromobacter sp. CCUG 3353 | Bacteria;Proteobacteria;Gammaproteobacteria;Burkholderiales;Alcaligenaceae;Achromobacter |
| FJ529701 | Roseomonas sp. CPCC 100079 | Bacteria;Proteobacteria;Alphaproteobacteria;Acetobacterales;Acetobacteraceae;Muricoccus |
| FP929140 | gamma proteobacterium HdN1 | Bacteria;Proteobacteria;Gammaproteobacteria;Pseudomonadales;Halomonadaceae;HdN1 |
| FP929140 | gamma proteobacterium HdN1 | Bacteria;Proteobacteria;Gammaproteobacteria;Pseudomonadales;Halomonadaceae;HdN1 |
| AB073573 | Cytophaga sp. I-545 | Bacteria;Bacteroidota;Bacteroidia;Flavobacteriales;Flavobacteriaceae;Mesoflavibacter |
| DQ915636 | Sulfitobacter mediterraneus | Bacteria;Proteobacteria;Alphaproteobacteria;Rhodobacterales;Rhodobacteraceae;Sulfitobacter |
| JQ417271 | Streptomyces sp. Antag4 | Bacteria;Actinobacteriota;Actinobacteria;Streptomycetales;Streptomycetaceae;Streptomyces |
| JQ746423 | Achromobacter insolitus | Bacteria;Proteobacteria;Gammaproteobacteria;Burkholderiales;Alcaligenaceae;Achromobacter |
| LN849457 | Acidovorax anthurii | Bacteria;Proteobacteria;Gammaproteobacteria;Burkholderiales;Comamonadaceae;Acidovorax |
| FP929140 | gamma proteobacterium HdN1 | Bacteria;Proteobacteria;Gammaproteobacteria;Pseudomonadales;Halomonadaceae;HdN1 |
| MF979558 | Enterococcus casseliflavus | Bacteria;Firmicutes;Bacilli;Lactobacillales;Enterococcaceae;Enterococcus |
| KP126459 | Streptomyces sp. FXJ1.753 | Bacteria;Actinobacteriota;Actinobacteria;Streptomycetales;Streptomycetaceae;Streptomyces |
| JQ187724 | uncultured bacterium | Bacteria;Proteobacteria;Gammaproteobacteria;Burkholderiales;Alcaligenaceae;uncultured |
| JQ187980 | uncultured bacterium | Bacteria;Proteobacteria;Gammaproteobacteria;Burkholderiales;Alcaligenaceae;uncultured |
| FJ903194 | Alteromonas sp. H91 | Bacteria;Proteobacteria;Gammaproteobacteria;Enterobacterales;Alteromonadaceae;uncultured |
| FJ952826 | Colwellia sp. 1tb5 | Bacteria;Proteobacteria;Gammaproteobacteria;Enterobacterales;Colwelliaceae;uncultured |
| FM213396 | Arthrobacter sp. MNPB6 | Bacteria;Actinobacteriota;Actinobacteria;Micrococcales;Micrococcaceae;Paenarthrobacter |
| KR822469 | Enterococcus sp. PF1-24 | Bacteria;Firmicutes;Bacilli;Lactobacillales;Enterococcaceae;Enterococcus |
| LN906597 | bacterium 2013Arg42i | Bacteria;Proteobacteria;Gammaproteobacteria;Burkholderiales;Burkholderiales Incertae Sedis;2013Ark19i |
| AB183569 | Synechococcus sp. MBIC10613 | Bacteria;Cyanobacteria;Cyanobacteriia;Synechococcales;Cyanobiaceae;Synechococcus MBIC10613 |
| EF546426 | Actinomadura sp. 171849 | Bacteria;Actinobacteriota;Actinobacteria;Streptosporangiales;Thermomonosporaceae;Actinomadura |
| FJ826621 | Spirulina subsalsa FACHB-351 | Bacteria;Cyanobacteria;Cyanobacteriia;Cyanobacteriales;Paraspirulinaceae;Spirulina PCC-9445 |
| DI412661 | unidentified | Bacteria;Firmicutes;Bacilli;Lactobacillales;Enterococcaceae;Enterococcus |
| EF623832 | Achromobacter xylosoxidans | Bacteria;Proteobacteria;Gammaproteobacteria;Burkholderiales;Alcaligenaceae;Achromobacter |
| KM374759 | Achromobacter spanius | Bacteria;Proteobacteria;Gammaproteobacteria;Burkholderiales;Alcaligenaceae;Achromobacter |
| EF630354 | Synechococcus sp. MLCB | Bacteria;Cyanobacteria;Cyanobacteriia;Synechococcales;Cyanobiaceae;Synechococcus MBIC10613 |
| AB184745 | Streptomyces rimosus | Bacteria;Actinobacteriota;Actinobacteria;Streptomycetales;Streptomycetaceae;Streptomyces |
| EF546422 | Actinomadura sp. 171828 | Bacteria;Actinobacteriota;Actinobacteria;Streptosporangiales;Thermomonosporaceae;Actinomadura |
| EF546421 | Actinomadura sp. 171824 | Bacteria;Actinobacteriota;Actinobacteria;Streptosporangiales;Thermomonosporaceae;Actinomadura |
| KP245774 | Bacillus firmus | Bacteria;Firmicutes;Bacilli;Bacillales;Bacillaceae;Bacillus |
| JQ187637 | uncultured bacterium | Bacteria;Proteobacteria;Gammaproteobacteria;Burkholderiales;Alcaligenaceae;uncultured |
| HK556151 | unidentified | Bacteria;Firmicutes;Clostridia;Peptostreptococcales-Tissierellales;Peptostreptococcaceae;Paeniclostridium |
| LC215282 | Calothrix sp. NIES-2100 | Bacteria;Cyanobacteria;Cyanobacteriia;Cyanobacteriales;Nostocaceae;Calothrix NIES-2100 |
| MG386290 | Azotobacter salinestris | Bacteria;Proteobacteria;Gammaproteobacteria;Pseudomonadales;Pseudomonadaceae;Azotobacter |
| HM218546 | Enterococcus faecium | Bacteria;Firmicutes;Bacilli;Lactobacillales;Enterococcaceae;Enterococcus |
| FJ887954 | Lentzea aerocolonigenes | Bacteria;Actinobacteriota;Actinobacteria;Pseudonocardiales;Pseudonocardiaceae;Lechevalieria |
| EF623833 | Achromobacter xylosoxidans | Bacteria;Proteobacteria;Gammaproteobacteria;Burkholderiales;Alcaligenaceae;Achromobacter |
| GU289642 | Alteromonas sp. MEBiC06033 | Bacteria;Proteobacteria;Gammaproteobacteria;Enterobacterales;Alteromonadaceae;uncultured |
| KF934492 | Azotobacter vinelandii | Bacteria;Proteobacteria;Gammaproteobacteria;Pseudomonadales;Pseudomonadaceae;Azotobacter |
| KF203122 | Paenarthrobacter aurescens | Bacteria;Actinobacteriota;Actinobacteria;Micrococcales;Micrococcaceae;Paenarthrobacter |
| KJ457333 | uncultured bacterium | Bacteria;Proteobacteria;Gammaproteobacteria;Burkholderiales;Alcaligenaceae;Achromobacter |
| KM496556 | Halobacteriaceae archaeon SHRA26 | Archaea;Halobacterota;Halobacteria;Halobacterales;Haloferacaceae;uncultured |
| KT021534 | Enterococcus casseliflavus | Bacteria;Firmicutes;Bacilli;Lactobacillales;Enterococcaceae;Enterococcus |
| AB218877 | Koukoulia aurantiaca | Bacteria;Proteobacteria;Gammaproteobacteria;Cardiobacteriales;Wohlfahrtiimonadaceae;Koukoulia |
| LN906597 | bacterium 2013Arg42i | Bacteria;Proteobacteria;Gammaproteobacteria;Burkholderiales;Burkholderiales Incertae Sedis;2013Ark19i |
| AB116658 | Aphanothece sacrum | Bacteria;Cyanobacteria;Cyanobacteriia;Cyanobacteriales;Microcystaceae;SU2 symbiont group |
| KF287190 | Actinomadura sp. PN4222 | Bacteria;Actinobacteriota;Actinobacteria;Streptosporangiales;Thermomonosporaceae;Actinomadura |
| KT160249 | Kitasatospora psammotica | Bacteria;Proteobacteria;Gammaproteobacteria;Burkholderiales;Alcaligenaceae;Achromobacter |
| KP265967 | Rhodobacterales bacterium JY-7 | Bacteria;Proteobacteria;Alphaproteobacteria;Rhodobacterales;Rhodobacteraceae;uncultured |
| MG593930 | Mesorhizobium sp. | Bacteria;Proteobacteria;Alphaproteobacteria;Rhizobiales;Rhizobiaceae;Mesorhizobium |
| HQ717302 | Enterococcus sp. C6I11 | Bacteria;Firmicutes;Bacilli;Lactobacillales;Enterococcaceae;Enterococcus |
| HQ882804 | Alcaligenaceae bacterium W36 | Bacteria;Proteobacteria;Gammaproteobacteria;Burkholderiales;Alcaligenaceae;uncultured |
| HM587927 | Agromyces sp. m7-53 | Bacteria;Actinobacteriota;Actinobacteria;Micrococcales;Micrococcaceae;uncultured |
| EU195864 | Alcaligenes sp. ACS1 | Bacteria;Proteobacteria;Gammaproteobacteria;Burkholderiales;Alcaligenaceae;Achromobacter |
| KC862589 | Cystobacter sp. 6tb | Bacteria;Myxococcota;Myxococcia;Myxococcales;Myxococcaceae;uncultured |
| KU597496 | Achromobacter sp. RD_MATFA_09 | Bacteria;Proteobacteria;Gammaproteobacteria;Burkholderiales;Alcaligenaceae;Achromobacter |
| JF411519 | bacterium 3D803 | Bacteria;Proteobacteria;Gammaproteobacteria;Enterobacterales;Alteromonadaceae;uncultured |
| KT260697 | Koukoulia aurantiaca | Bacteria;Proteobacteria;Gammaproteobacteria;Cardiobacteriales;Wohlfahrtiimonadaceae;Koukoulia |
| JF411437 | bacterium 1D806 | Bacteria;Proteobacteria;Gammaproteobacteria;Enterobacterales;Alteromonadaceae;uncultured |
| KP010339 | Acidovorax oryzae | Bacteria;Proteobacteria;Gammaproteobacteria;Burkholderiales;Comamonadaceae;Acidovorax |
| JF411481 | bacterium 1H303 | Bacteria;Proteobacteria;Gammaproteobacteria;Enterobacterales;Alteromonadaceae;uncultured |
| KJ590041 | uncultured Alteromonadaceae bacterium | Bacteria;Proteobacteria;Gammaproteobacteria;Enterobacterales;Alteromonadaceae;uncultured |
| AB373956 | Colwelliaceae bacterium 04OKA-12-54 | Bacteria;Proteobacteria;Gammaproteobacteria;Enterobacterales;Colwelliaceae;uncultured |
| KP843715 | Aestuariibacter sp. Fun4 | Bacteria;Proteobacteria;Gammaproteobacteria;Enterobacterales;Alteromonadaceae;uncultured |
| AP012549 | cyanobacterium endosymbiont of Epithemia turgida isolate EtSB Lake Yunoko | Bacteria;Cyanobacteria;Cyanobacteriia;Cyanobacteriales;Microcystaceae;SU2 symbiont group |
| KP992891 | Mesorhizobium sp. PHD15 | Bacteria;Proteobacteria;Alphaproteobacteria;Rhizobiales;Rhizobiaceae;Mesorhizobium |
| AB546278 | Lentzea sp. IR11-RCA120 | Bacteria;Actinobacteriota;Actinobacteria;Pseudonocardiales;Pseudonocardiaceae;Lechevalieria |
| KY419870 | Achromobacter xylosoxidans | Bacteria;Proteobacteria;Gammaproteobacteria;Burkholderiales;Alcaligenaceae;Achromobacter |
| EU214610 | Achromobacter xylosoxidans | Bacteria;Proteobacteria;Gammaproteobacteria;Burkholderiales;Alcaligenaceae;Achromobacter |
| KY416000 | Gayadomonas sp. | Bacteria;Proteobacteria;Gammaproteobacteria;Enterobacterales;Alteromonadaceae;Gayadomonas |
| KJ590611 | uncultured bacterium | Bacteria;Proteobacteria;Alphaproteobacteria;Rhodobacterales;Rhodobacteraceae;uncultured |
| AB546732 | cyanobacterium endosymbiont of Epithemia turgida | Bacteria;Cyanobacteria;Cyanobacteriia;Cyanobacteriales;Microcystaceae;SU2 symbiont group |
| KY515342 | Mesorhizobium ciceri | Bacteria;Proteobacteria;Alphaproteobacteria;Rhizobiales;Rhizobiaceae;Mesorhizobium |
| KY515343 | Mesorhizobium ciceri | Bacteria;Proteobacteria;Alphaproteobacteria;Rhizobiales;Rhizobiaceae;Mesorhizobium |
| AP012549 | cyanobacterium endosymbiont of Epithemia turgida isolate EtSB Lake Yunoko | Bacteria;Cyanobacteria;Cyanobacteriia;Cyanobacteriales;Microcystaceae;SU2 symbiont group |
| AB680773 | Achromobacter xylosoxidans | Bacteria;Proteobacteria;Gammaproteobacteria;Burkholderiales;Alcaligenaceae;Achromobacter |
| LT607803 | Variovorax sp. HW608 | Bacteria;Proteobacteria;Gammaproteobacteria;Burkholderiales;Comamonadaceae;Variovorax |
| AB680772 | Achromobacter denitrificans | Bacteria;Proteobacteria;Gammaproteobacteria;Burkholderiales;Alcaligenaceae;Achromobacter |
| LT607803 | Variovorax sp. HW608 | Bacteria;Proteobacteria;Gammaproteobacteria;Burkholderiales;Comamonadaceae;Variovorax |
| KP876580 | Methyloterrigena soli | Bacteria;Proteobacteria;Alphaproteobacteria;Rhizobiales;Devosiaceae;Methyloterrigena |
| AB680418 | Achromobacter xylosoxidans | Bacteria;Proteobacteria;Gammaproteobacteria;Burkholderiales;Alcaligenaceae;Achromobacter |
| AB681803 | Achromobacter piechaudii | Bacteria;Proteobacteria;Gammaproteobacteria;Burkholderiales;Alcaligenaceae;Achromobacter |
| KP992879 | Mesorhizobium sp. PHD3 | Bacteria;Proteobacteria;Alphaproteobacteria;Rhizobiales;Rhizobiaceae;Mesorhizobium |
| AP017375 | Stanieria sp. NIES-3757 | Bacteria;Cyanobacteria;Cyanobacteriia;Cyanobacteriales;Xenococcaceae;Stanieria PCC-7437 |
| AB681885 | Azotobacter salinestris | Bacteria;Proteobacteria;Gammaproteobacteria;Pseudomonadales;Pseudomonadaceae;Azotobacter |
| KJ691874 | Bacillus firmus | Bacteria;Firmicutes;Bacilli;Bacillales;Bacillaceae;Bacillus |
| KU198860 | Achromobacter sp. ACH01 | Bacteria;Proteobacteria;Gammaproteobacteria;Burkholderiales;Alcaligenaceae;Achromobacter |
| AP017375 | Stanieria sp. NIES-3757 | Bacteria;Cyanobacteria;Cyanobacteriia;Cyanobacteriales;Xenococcaceae;Stanieria PCC-7437 |
| MH244352 | Actinomadura sp. | Bacteria;Actinobacteriota;Actinobacteria;Streptosporangiales;Thermomonosporaceae;Actinomadura |
| AP018178 | Calothrix sp. NIES-2100 | Bacteria;Cyanobacteria;Cyanobacteriia;Cyanobacteriales;Nostocaceae;Calothrix NIES-2100 |
| AP018178 | Calothrix sp. NIES-2100 | Bacteria;Cyanobacteria;Cyanobacteriia;Cyanobacteriales;Nostocaceae;Calothrix NIES-2100 |
| AP018341 | cyanobacterium endosymbiont of Rhopalodia gibberula | Bacteria;Cyanobacteria;Cyanobacteriia;Cyanobacteriales;Microcystaceae;SU2 symbiont group |
| AP018178 | Calothrix sp. NIES-2100 | Bacteria;Cyanobacteria;Cyanobacteriia;Cyanobacteriales;Nostocaceae;Calothrix NIES-2100 |
| GU644361 | Sulfitobacter sp. KLE1217 | Bacteria;Proteobacteria;Alphaproteobacteria;Rhodobacterales;Rhodobacteraceae;Sulfitobacter |
| AP018341 | cyanobacterium endosymbiont of Rhopalodia gibberula | Bacteria;Cyanobacteria;Cyanobacteriia;Cyanobacteriales;Microcystaceae;SU2 symbiont group |
| AP018178 | Calothrix sp. NIES-2100 | Bacteria;Cyanobacteria;Cyanobacteriia;Cyanobacteriales;Nostocaceae;Calothrix NIES-2100 |
| AP018178 | Calothrix sp. NIES-2100 | Bacteria;Cyanobacteria;Cyanobacteriia;Cyanobacteriales;Nostocaceae;Calothrix NIES-2100 |
| KU711997 | Variovorax soli | Bacteria;Proteobacteria;Gammaproteobacteria;Burkholderiales;Comamonadaceae;Variovorax |
| AY007684 | unknown marine alpha proteobacterium JP88.1 | Bacteria;Proteobacteria;Alphaproteobacteria;Rhodobacterales;Rhodobacteraceae;Leisingera |
| LN573393 | uncultured bacterium | Bacteria;Actinobacteriota;Actinobacteria;Kineosporiales;Kineosporiaceae;uncultured |
| HG315619 | Candidatus Trichorickettsia mobilis | Bacteria;Proteobacteria;Alphaproteobacteria;Rickettsiales;Rickettsiaceae;Candidatus Trichorickettsia |
| FJ975799 | uncultured Lactobacillales bacterium | Bacteria;Firmicutes;Bacilli;Lactobacillales;Enterococcaceae;Enterococcus |
| AF022392 | alpha proteobacterium str. 303 | Bacteria;Proteobacteria;Alphaproteobacteria;Rhodobacterales;Rhodobacteraceae;Leisingera |
| FJ976010 | uncultured Lactobacillaceae bacterium | Bacteria;Firmicutes;Bacilli;Lactobacillales;Lactobacillaceae;uncultured |
| FJ975785 | uncultured Lactobacillales bacterium | Bacteria;Firmicutes;Bacilli;Lactobacillales;Enterococcaceae;Enterococcus |
| KX014817 | Mesorhizobium sp. CR7 | Bacteria;Proteobacteria;Alphaproteobacteria;Rhizobiales;Rhizobiaceae;Mesorhizobium |
| HG315612 | Candidatus Trichorickettsia mobilis | Bacteria;Proteobacteria;Alphaproteobacteria;Rickettsiales;Rickettsiaceae;Candidatus Trichorickettsia |
| AF132931 | Stanieria cyanosphaera PCC 7437 | Bacteria;Cyanobacteria;Cyanobacteriia;Cyanobacteriales;Xenococcaceae;Stanieria PCC-7437 |
| KU951807 | Synechococcus sp. LEGE 11466 | Bacteria;Cyanobacteria;Cyanobacteriia;Synechococcales;Cyanobiaceae;Synechococcus MBIC10613 |
| MF039744 | Candidatus Trichorickettsia mobilis subsp. hyperinfectiva | Bacteria;Proteobacteria;Alphaproteobacteria;Rickettsiales;Rickettsiaceae;Candidatus Trichorickettsia |
| KU851040 | Bacillus sp. ADMK84 | Bacteria;Firmicutes;Bacilli;Bacillales;Bacillaceae;Bacillus |
| MH686079 | Methyloterrigena sp. | Bacteria;Proteobacteria;Alphaproteobacteria;Rhizobiales;Devosiaceae;Methyloterrigena |
| AF286480 | Bacillus sp. VAN12 | Bacteria;Firmicutes;Bacilli;Bacillales;Bacillaceae;Bacillus |
| KX014836 | Mesorhizobium sp. CR26 | Bacteria;Proteobacteria;Alphaproteobacteria;Rhizobiales;Rhizobiaceae;Mesorhizobium |
| AF359532 | marine bacterium ATAM173a_17 | Bacteria;Proteobacteria;Alphaproteobacteria;Rhodobacterales;Rhodobacteraceae;Sulfitobacter |
| LN612727 | uncultured bacterium | Bacteria;Proteobacteria;Gammaproteobacteria;Burkholderiales;Burkholderiales Incertae Sedis;2013Ark19i |
| AF296873 | Cyanothece sp. PCC 8801 | Bacteria;Cyanobacteria;Cyanobacteriia;Cyanobacteriales;Microcystaceae;Cyanothece PCC-8801 |
| KX139491 | Streptomyces verticillus | Bacteria;Actinobacteriota;Actinobacteria;Streptomycetales;Streptomycetaceae;Streptomyces |
| MH899231 | Enterococcus casseliflavus | Bacteria;Firmicutes;Bacilli;Lactobacillales;Enterococcaceae;Enterococcus |
| KX139490 | Streptomyces verticillus | Bacteria;Actinobacteriota;Actinobacteria;Streptomycetales;Streptomycetaceae;Streptomyces |
| CP001287 | Cyanothece sp. PCC 8801 | Bacteria;Cyanobacteria;Cyanobacteriia;Cyanobacteriales;Microcystaceae;Cyanothece PCC-8801 |
| CP001287 | Cyanothece sp. PCC 8801 | Bacteria;Cyanobacteria;Cyanobacteriia;Cyanobacteriales;Microcystaceae;Cyanothece PCC-8801 |
| AF329394 | Spirulina subsalsa | Bacteria;Cyanobacteria;Cyanobacteriia;Cyanobacteriales;Paraspirulinaceae;Spirulina PCC-9445 |
| CP001701 | Cyanothece sp. PCC 8802 | Bacteria;Cyanobacteria;Cyanobacteriia;Cyanobacteriales;Microcystaceae;Cyanothece PCC-8801 |
| KC465632 | uncultured bacterium | Bacteria;Proteobacteria;Gammaproteobacteria;Burkholderiales;Alcaligenaceae;Achromobacter |
| CP001701 | Cyanothece sp. PCC 8802 | Bacteria;Cyanobacteria;Cyanobacteriia;Cyanobacteriales;Microcystaceae;Cyanothece PCC-8801 |
| CP002059 | 'Nostoc azollae' 0708 | Bacteria;Cyanobacteria;Cyanobacteriia;Cyanobacteriales;Nostocaceae;Nostoc 0708 |
| CP002059 | 'Nostoc azollae' 0708 | Bacteria;Cyanobacteria;Cyanobacteriia;Cyanobacteriales;Nostocaceae;Nostoc 0708 |
| KP645122 | uncultured Alcaligenaceae bacterium | Bacteria;Proteobacteria;Gammaproteobacteria;Burkholderiales;Alcaligenaceae;uncultured |
| CP002059 | 'Nostoc azollae' 0708 | Bacteria;Cyanobacteria;Cyanobacteriia;Cyanobacteriales;Nostocaceae;Nostoc 0708 |
| KC541531 | uncultured bacterium | Bacteria;Proteobacteria;Gammaproteobacteria;Burkholderiales;Alcaligenaceae;Achromobacter |
| KC554721 | uncultured bacterium | Bacteria;Actinobacteriota;Actinobacteria;Streptomycetales;Streptomycetaceae;Streptomyces |
| CP002059 | 'Nostoc azollae' 0708 | Bacteria;Cyanobacteria;Cyanobacteriia;Cyanobacteriales;Nostocaceae;Nostoc 0708 |
| GU056112 | uncultured bacterium | Bacteria;Cyanobacteria;Cyanobacteriia;Synechococcales;Cyanobiaceae;Synechococcus MBIC10613 |
| AM500794 | uncultured bacterium | Bacteria;Firmicutes;Clostridia;Peptostreptococcales-Tissierellales;Family XI;uncultured |
| FN563220 | uncultured bacterium | Bacteria;Bacteroidota;Bacteroidia;Bacteroidales;HAW-RM37-2 |
| FN563203 | uncultured bacterium | Bacteria;Bacteroidota;Bacteroidia;Bacteroidales;HAW-RM37-2 |
| KP746976 | BTEX-degrading bacterium enrichment culture | Bacteria;Proteobacteria;Gammaproteobacteria;Burkholderiales;Alcaligenaceae;Achromobacter |
| AF529126 | uncultured Epsilonproteobacteria bacterium | Bacteria;Acidobacteriota;Holophagae;Holophagales;Holophagaceae;uncultured |
| CP003653 | Stanieria cyanosphaera PCC 7437 | Bacteria;Cyanobacteria;Cyanobacteriia;Cyanobacteriales;Xenococcaceae;Stanieria PCC-7437 |
| CP003987 | Streptomyces sp. 769 | Bacteria;Actinobacteriota;Actinobacteria;Streptomycetales;Streptomycetaceae;Streptomyces |
| AY349382 | Lactobacillus sp. oral clone HT002 | Bacteria;Firmicutes;Bacilli;Lactobacillales;Lactobacillaceae;HT002 |
| AY491624 | uncultured bacterium | Bacteria;Proteobacteria;Alphaproteobacteria;Rhizobiales;Rhizobiaceae;Mesorhizobium |
| AY081979 | uncultured bacterium | Bacteria;Proteobacteria;Gammaproteobacteria;Burkholderiales;Alcaligenaceae;Achromobacter |
| GU230351 | uncultured gamma proteobacterium | Bacteria;Proteobacteria;Gammaproteobacteria;Enterobacterales;Colwelliaceae;uncultured |
| JF920335 | uncultured bacterium | Bacteria;Firmicutes;Bacilli;Lactobacillales;Enterococcaceae;Enterococcus |
| EU134366 | uncultured bacterium | Bacteria;Myxococcota;Myxococcia;Myxococcales;Myxococcaceae;uncultured |
| CP003653 | Stanieria cyanosphaera PCC 7437 | Bacteria;Cyanobacteria;Cyanobacteriia;Cyanobacteriales;Xenococcaceae;Stanieria PCC-7437 |
| AY328588 | uncultured bacterium | Bacteria;Proteobacteria;Alphaproteobacteria;Rhizobiales;Beijerinckiaceae;uncultured |
| GU305850 | uncultured bacterium | Bacteria;Proteobacteria;Alphaproteobacteria;Rhizobiales;Beijerinckiaceae;uncultured |
| JQ738968 | uncultured bacterium | Bacteria;Cyanobacteria;Cyanobacteriia;Cyanobacteriales;Paraspirulinaceae;Spirulina PCC-9445 |
| CU919686 | uncultured bacterium | Bacteria;Actinobacteriota;Actinobacteria;Micrococcales;Intrasporangiaceae;uncultured |
| JQ855576 | uncultured bacterium | Bacteria;Actinobacteriota;Actinobacteria;Micrococcales;Micrococcaceae;uncultured |
| EU453741 | uncultured bacterium | Bacteria;Firmicutes;Bacilli;Lactobacillales;Lactobacillaceae;HT002 |
| EU456241 | uncultured bacterium | Bacteria;Firmicutes;Bacilli;Lactobacillales;Lactobacillaceae;HT002 |
| EU460877 | uncultured bacterium | Bacteria;Firmicutes;Bacilli;Lactobacillales;Lactobacillaceae;uncultured |
| JQ726801 | uncultured Enterococcaceae bacterium | Bacteria;Firmicutes;Bacilli;Lactobacillales;Enterococcaceae;Enterococcus |
| DQ289927 | uncultured cyanobacterium | Bacteria;Cyanobacteria;Cyanobacteriia;Cyanobacteriales;Microcystaceae;SU2 symbiont group |
| EU505411 | uncultured bacterium | Bacteria;Firmicutes;Bacilli;Lactobacillales;Lactobacillaceae;uncultured |
| CP021874 | Enterococcus wangshanyuanii | Bacteria;Firmicutes;Bacilli;Lactobacillales;Enterococcaceae;Enterococcus |
| EU475825 | uncultured bacterium | Bacteria;Firmicutes;Clostridia;Oscillospirales;uncultured |
| CU919271 | uncultured bacterium | Bacteria;Actinobacteriota;Actinobacteria;Micrococcales;Intrasporangiaceae;uncultured |
| CU919990 | uncultured bacterium | Bacteria;Actinobacteriota;Actinobacteria;Micrococcales;Intrasporangiaceae;uncultured |
| EU560764 | uncultured bacterium | Bacteria;Firmicutes;Bacilli;Lactobacillales;Enterococcaceae;Enterococcus |
| DQ066960 | uncultured bacterium | Bacteria;Proteobacteria;Gammaproteobacteria;Burkholderiales;Oxalobacteraceae;uncultured |
| JQ818213 | uncultured Achromobacter sp. | Bacteria;Proteobacteria;Gammaproteobacteria;Burkholderiales;Alcaligenaceae;Achromobacter |
| EU454255 | uncultured bacterium | Bacteria;Firmicutes;Bacilli;Lactobacillales;Lactobacillaceae;HT002 |
| EU452524 | uncultured bacterium | Bacteria;Firmicutes;Bacilli;Lactobacillales;Lactobacillaceae;HT002 |
| KR029167 | Bacillus sp. mixed culture J1-6F | Bacteria;Firmicutes;Bacilli;Bacillales;Bacillaceae;Bacillus |
| EU454406 | uncultured bacterium | Bacteria;Firmicutes;Bacilli;Lactobacillales;Lactobacillaceae;HT002 |
| EU455154 | uncultured bacterium | Bacteria;Firmicutes;Bacilli;Lactobacillales;Lactobacillaceae;HT002 |
| EU456966 | uncultured bacterium | Bacteria;Firmicutes;Bacilli;Lactobacillales;Lactobacillaceae;HT002 |
| HQ716399 | uncultured bacterium | Bacteria;Firmicutes;Bacilli;Lactobacillales;Enterococcaceae;Enterococcus |
| DQ794161 | uncultured bacterium | Bacteria;Firmicutes;Clostridia;Oscillospirales;uncultured |
| HQ745931 | uncultured organism | Bacteria;Firmicutes;Bacilli;Lactobacillales;Enterococcaceae;Enterococcus |
| HQ746192 | uncultured organism | Bacteria;Firmicutes;Bacilli;Lactobacillales;Enterococcaceae;Enterococcus |
| HQ746247 | uncultured organism | Bacteria;Firmicutes;Bacilli;Lactobacillales;Enterococcaceae;Enterococcus |
| EU505360 | uncultured bacterium | Bacteria;Firmicutes;Bacilli;Lactobacillales;Lactobacillaceae;HT002 |
| DQ797281 | uncultured bacterium | Bacteria;Firmicutes;Clostridia;Oscillospirales;uncultured |
| JQ957837 | uncultured beta proteobacterium | Bacteria;Proteobacteria;Gammaproteobacteria;Burkholderiales;Comamonadaceae;uncultured |
| EU560844 | uncultured bacterium | Bacteria;Firmicutes;Bacilli;Lactobacillales;Enterococcaceae;Enterococcus |
| EU772735 | uncultured bacterium | Bacteria;Firmicutes;Clostridia;Oscillospirales;Butyricicoccaceae;uncultured |
| EU772882 | uncultured bacterium | Bacteria;Firmicutes;Clostridia;Oscillospirales;Butyricicoccaceae;uncultured |
| EU560870 | uncultured bacterium | Bacteria;Firmicutes;Bacilli;Lactobacillales;Enterococcaceae;Enterococcus |
| EU455833 | uncultured bacterium | Bacteria;Firmicutes;Bacilli;Lactobacillales;Lactobacillaceae;HT002 |
| EU457206 | uncultured bacterium | Bacteria;Firmicutes;Bacilli;Lactobacillales;Lactobacillaceae;HT002 |
| JN177897 | uncultured bacterium | Bacteria;Actinobacteriota;Actinobacteria;Micrococcales;Micrococcaceae;uncultured |
| CP021874 | Enterococcus wangshanyuanii | Bacteria;Firmicutes;Bacilli;Lactobacillales;Enterococcaceae;Enterococcus |
| JX222957 | uncultured bacterium | Bacteria;Desulfobacterota;Desulfuromonadia;Desulfuromonadales;Desulfuromonadaceae;Candidatus Deferrimonas |
| CP021874 | Enterococcus wangshanyuanii | Bacteria;Firmicutes;Bacilli;Lactobacillales;Enterococcaceae;Enterococcus |
| CP021874 | Enterococcus wangshanyuanii | Bacteria;Firmicutes;Bacilli;Lactobacillales;Enterococcaceae;Enterococcus |
| HQ745861 | uncultured organism | Bacteria;Firmicutes;Bacilli;Lactobacillales;Enterococcaceae;Enterococcus |
| HQ746321 | uncultured organism | Bacteria;Firmicutes;Bacilli;Lactobacillales;Enterococcaceae;Enterococcus |
| EU772338 | uncultured bacterium | Bacteria;Firmicutes;Clostridia;Oscillospirales;Oscillospiraceae;uncultured |
| EU560876 | uncultured bacterium | Bacteria;Firmicutes;Bacilli;Lactobacillales;Enterococcaceae;Enterococcus |
| EU771874 | uncultured bacterium | Bacteria;Firmicutes;Bacilli;Erysipelotrichales;Erysipelatoclostridiaceae;uncultured |
| DQ808696 | uncultured bacterium | Bacteria;Firmicutes;Clostridia;Oscillospirales;uncultured |
| KF066648 | uncultured bacterium | Bacteria;Actinobacteriota;Actinobacteria;Kineosporiales;Kineosporiaceae;uncultured |
| DQ113668 | uncultured bacterium | Bacteria;Firmicutes;Clostridia;Oscillospirales;Butyricicoccaceae;uncultured |
| EU560821 | uncultured bacterium | Bacteria;Firmicutes;Bacilli;Lactobacillales;Enterococcaceae;Enterococcus |
| EU560859 | uncultured bacterium | Bacteria;Firmicutes;Bacilli;Lactobacillales;Enterococcaceae;Enterococcus |
| EU453809 | uncultured bacterium | Bacteria;Firmicutes;Bacilli;Lactobacillales;Lactobacillaceae;HT002 |
| KF179890 | uncultured bacterium | Bacteria;Cyanobacteria;Cyanobacteriia;Cyanobacteriales;Xenococcaceae;uncultured |
| EU460741 | uncultured bacterium | Bacteria;Firmicutes;Bacilli;Lactobacillales;Lactobacillaceae;uncultured |
| EF098002 | uncultured bacterium | Bacteria;Firmicutes;Bacilli;Erysipelotrichales;Erysipelatoclostridiaceae;uncultured |
| CP010802 | Desulfuromonas soudanensis | Bacteria;Desulfobacterota;Desulfuromonadia;Desulfuromonadales;Desulfuromonadaceae;Candidatus Deferrimonas |
| EF099189 | uncultured bacterium | Bacteria;Firmicutes;Bacilli;Erysipelotrichales;Erysipelatoclostridiaceae;uncultured |
| KF100776 | uncultured bacterium | Bacteria;Actinobacteriota;Actinobacteria;Micrococcales;Micrococcaceae;uncultured |
| JX223466 | uncultured bacterium | Bacteria;Desulfobacterota;Desulfuromonadia;Desulfuromonadales;Desulfuromonadaceae;Candidatus Deferrimonas |
| DQ334614 | uncultured bacterium | Bacteria;Proteobacteria;Alphaproteobacteria;Rhodobacterales;Rhodobacteraceae;uncultured |
| JX240785 | uncultured actinobacterium | Bacteria;Actinobacteriota;Actinobacteria;Micrococcales;Micrococcaceae;uncultured |
| KT308355 | uncultured Enterococcus sp. | Bacteria;Firmicutes;Bacilli;Lactobacillales;Enterococcaceae;Enterococcus |
| EU771963 | uncultured bacterium | Bacteria;Firmicutes;Bacilli;Erysipelotrichales;Erysipelatoclostridiaceae;uncultured |
| EU779402 | uncultured bacterium | Bacteria;Firmicutes;Clostridia;Oscillospirales;uncultured |
| JX095431 | uncultured bacterium | Bacteria;Firmicutes;Clostridia;Oscillospirales;Oscillospiraceae;uncultured |
| JN391784 | uncultured bacterium | Bacteria;Proteobacteria;Gammaproteobacteria;Burkholderiales;Comamonadaceae;uncultured |
| GQ155981 | uncultured bacterium | Bacteria;Firmicutes;Bacilli;Lactobacillales;Enterococcaceae;Enterococcus |
| GQ156010 | uncultured bacterium | Bacteria;Firmicutes;Bacilli;Lactobacillales;Enterococcaceae;Enterococcus |
| GQ156033 | uncultured bacterium | Bacteria;Firmicutes;Bacilli;Lactobacillales;Enterococcaceae;Enterococcus |
| GQ156063 | uncultured bacterium | Bacteria;Firmicutes;Bacilli;Lactobacillales;Enterococcaceae;Enterococcus |
| HQ745873 | uncultured organism | Bacteria;Firmicutes;Bacilli;Lactobacillales;Enterococcaceae;Enterococcus |
| HQ745905 | uncultured organism | Bacteria;Firmicutes;Bacilli;Lactobacillales;Enterococcaceae;Enterococcus |
| HQ745958 | uncultured organism | Bacteria;Firmicutes;Bacilli;Lactobacillales;Enterococcaceae;Enterococcus |
| GQ155881 | uncultured bacterium | Bacteria;Firmicutes;Bacilli;Lactobacillales;Enterococcaceae;Enterococcus |
| GQ155977 | uncultured bacterium | Bacteria;Firmicutes;Bacilli;Lactobacillales;Enterococcaceae;Enterococcus |
| EF111195 | uncultured beta proteobacterium | Bacteria;Proteobacteria;Gammaproteobacteria;Burkholderiales;Alcaligenaceae;Achromobacter |
| JX224626 | uncultured bacterium | Bacteria;Acidobacteriota;Holophagae;Holophagales;Holophagaceae;uncultured |
| KF721653 | uncultured bacterium | Bacteria;Proteobacteria;Gammaproteobacteria;Enterobacterales;Alteromonadaceae;uncultured |
| KF180111 | uncultured bacterium | Bacteria;Cyanobacteria;Cyanobacteriia;Cyanobacteriales;Xenococcaceae;uncultured |
| GQ155927 | uncultured bacterium | Bacteria;Firmicutes;Bacilli;Lactobacillales;Enterococcaceae;Enterococcus |
| GQ155967 | uncultured bacterium | Bacteria;Firmicutes;Bacilli;Lactobacillales;Enterococcaceae;Enterococcus |
| KF799153 | uncultured bacterium | Bacteria;Proteobacteria;Alphaproteobacteria;Rhodobacterales;Rhodobacteraceae;uncultured |
| GQ155749 | uncultured bacterium | Bacteria;Firmicutes;Bacilli;Lactobacillales;Enterococcaceae;Enterococcus |
| GQ156015 | uncultured bacterium | Bacteria;Firmicutes;Bacilli;Lactobacillales;Enterococcaceae;Enterococcus |
| GQ156053 | uncultured bacterium | Bacteria;Firmicutes;Bacilli;Lactobacillales;Enterococcaceae;Enterococcus |
| CP010802 | Desulfuromonas soudanensis | Bacteria;Desulfobacterota;Desulfuromonadia;Desulfuromonadales;Desulfuromonadaceae;Candidatus Deferrimonas |
| GQ156055 | uncultured bacterium | Bacteria;Firmicutes;Bacilli;Lactobacillales;Enterococcaceae;Enterococcus |
| KU713249 | uncultured bacterium | Bacteria;Proteobacteria;Alphaproteobacteria;Rhizobiales;Rhizobiaceae;Mesorhizobium |
| KT952637 | uncultured bacterium | Bacteria;Proteobacteria;Alphaproteobacteria;Rhizobiales;Rhizobiaceae;uncultured |
| MF314670 | uncultured bacterium | Bacteria;Proteobacteria;Gammaproteobacteria;Burkholderiales;Alcaligenaceae;uncultured |
| NEED01000041 | unicellular cyanobacterium SU2 | Bacteria;Cyanobacteria;Cyanobacteriia;Cyanobacteriales;Microcystaceae;SU2 symbiont group |
| FJ184316 | uncultured soil bacterium | Bacteria;Proteobacteria;Gammaproteobacteria;Burkholderiales;Alcaligenaceae;Achromobacter |
| GQ155979 | uncultured bacterium | Bacteria;Firmicutes;Bacilli;Lactobacillales;Enterococcaceae;Enterococcus |
| GQ156411 | uncultured bacterium | Bacteria;Firmicutes;Bacilli;Lactobacillales;Lactobacillaceae;uncultured |
| MG518583 | uncultured microorganism | Bacteria;Proteobacteria;Alphaproteobacteria;Rhizobiales;Rhizobiaceae;uncultured |
| GQ155706 | uncultured bacterium | Bacteria;Firmicutes;Bacilli;Lactobacillales;Enterococcaceae;Enterococcus |
| GQ155993 | uncultured bacterium | Bacteria;Firmicutes;Bacilli;Lactobacillales;Enterococcaceae;Enterococcus |
| JF107704 | uncultured bacterium | Bacteria;Proteobacteria;Alphaproteobacteria;Rhizobiales;Rhizobiaceae;uncultured |
| JF198660 | uncultured bacterium | Bacteria;Proteobacteria;Gammaproteobacteria;Burkholderiales;Oxalobacteraceae;uncultured |
| GQ416655 | uncultured Achromobacter sp. | Bacteria;Proteobacteria;Gammaproteobacteria;Burkholderiales;Alcaligenaceae;Achromobacter |
| GQ448158 | uncultured bacterium | Bacteria;Firmicutes;Bacilli;Erysipelotrichales;Erysipelatoclostridiaceae;uncultured |
| JX391452 | uncultured bacterium | Bacteria;Proteobacteria;Gammaproteobacteria;Enterobacterales;Alteromonadaceae;uncultured |
| CP031010 | Alteromonas sp. RKMC-009 | Bacteria;Proteobacteria;Gammaproteobacteria;Enterobacterales;Alteromonadaceae;uncultured |
| CP031010 | Alteromonas sp. RKMC-009 | Bacteria;Proteobacteria;Gammaproteobacteria;Enterobacterales;Alteromonadaceae;uncultured |
| AFOE01000057 | Mesoflavibacter zeaxanthinifaciens S86 | Bacteria;Bacteroidota;Bacteroidia;Flavobacteriales;Flavobacteriaceae;Mesoflavibacter |
| FJ268962 | uncultured Bacillus sp. | Bacteria;Firmicutes;Bacilli;Bacillales;Bacillaceae;Bacillus |
| JN680641 | uncultured Enterococcaceae bacterium | Bacteria;Firmicutes;Bacilli;Lactobacillales;Enterococcaceae;Enterococcus |
| JX391287 | uncultured bacterium | Bacteria;Proteobacteria;Gammaproteobacteria;Enterobacterales;Colwelliaceae;uncultured |
| FKIJ01000002 | bacterium 2013Ark19i | Bacteria;Proteobacteria;Gammaproteobacteria;Burkholderiales;Burkholderiales Incertae Sedis;2013Ark19i |
| KX603477 | uncultured Lactobacillus sp. | Bacteria;Firmicutes;Bacilli;Lactobacillales;Lactobacillaceae;uncultured |
| JF202991 | uncultured bacterium | Bacteria;Firmicutes;Bacilli;Lactobacillales;Enterococcaceae;Enterococcus |
| FJ675223 | uncultured bacterium | Bacteria;Firmicutes;Bacilli;Lactobacillales;Enterococcaceae;Enterococcus |
| ALVR01000007 | Spirulina subsalsa PCC 9445 | Bacteria;Cyanobacteria;Cyanobacteriia;Cyanobacteriales;Paraspirulinaceae;Spirulina PCC-9445 |
| DQ445859 | [Eubacterium] tenue | Bacteria;Firmicutes;Clostridia;Peptostreptococcales-Tissierellales;Peptostreptococcaceae;Paeniclostridium |
| JN680643 | uncultured Enterococcaceae bacterium | Bacteria;Firmicutes;Bacilli;Lactobacillales;Enterococcaceae;Enterococcus |
| KY287522 | uncultured bacterium | Bacteria;Cyanobacteria;Cyanobacteriia;Cyanobacteriales;Microcystaceae;Cyanothece PCC-8801 |
| FXBL01000004 | Mesorhizobium australicum | Bacteria;Proteobacteria;Alphaproteobacteria;Rhizobiales;Rhizobiaceae;Mesorhizobium |
| CVRN01000003 | Enterococcus sp. AM1 | Bacteria;Firmicutes;Bacilli;Lactobacillales;Enterococcaceae;Enterococcus |
| FMGS01000005 | uncultured Clostridium sp. | Bacteria;Firmicutes;Clostridia;Peptostreptococcales-Tissierellales;Peptostreptococcaceae;Paeniclostridium |
| JF417954 | uncultured bacterium | Bacteria;Firmicutes;Clostridia;Peptostreptococcales-Tissierellales;Family XI;uncultured |
| FJ716060 | uncultured bacterium | Bacteria;Proteobacteria;Gammaproteobacteria;Burkholderiales;Alcaligenaceae;Achromobacter |
| CP031010 | Alteromonas sp. RKMC-009 | Bacteria;Proteobacteria;Gammaproteobacteria;Enterobacterales;Alteromonadaceae;uncultured |
| CP031010 | Alteromonas sp. RKMC-009 | Bacteria;Proteobacteria;Gammaproteobacteria;Enterobacterales;Alteromonadaceae;uncultured |
| AIMG01000010 | Bartonella tamiae Th307 | Bacteria;Proteobacteria;Alphaproteobacteria;Rhizobiales;Rhizobiaceae;Bartonella |
| FPLM01002865 | metagenome | Bacteria;Proteobacteria;Alphaproteobacteria;Rhizobiales;Beijerinckiaceae;uncultured |
| CP031010 | Alteromonas sp. RKMC-009 | Bacteria;Proteobacteria;Gammaproteobacteria;Enterobacterales;Alteromonadaceae;uncultured |
| FJ671632 | uncultured bacterium | Bacteria;Firmicutes;Bacilli;Lactobacillales;Enterococcaceae;Enterococcus |
| LMRD01000007 | Aurantimonas sp. Leaf443 | Bacteria;Proteobacteria;Alphaproteobacteria;Rhizobiales;Rhizobiaceae;uncultured |
| FNVY01000003 | Enterococcus sp. Marseille-P2817 | Bacteria;Firmicutes;Bacilli;Lactobacillales;Enterococcaceae;Enterococcus |
| DQ395176 | Bartonella tamiae | Bacteria;Proteobacteria;Alphaproteobacteria;Rhizobiales;Rhizobiaceae;Bartonella |
| FJ672403 | uncultured bacterium | Bacteria;Firmicutes;Bacilli;Lactobacillales;Enterococcaceae;Enterococcus |
| FJ675580 | uncultured bacterium | Bacteria;Firmicutes;Bacilli;Lactobacillales;Enterococcaceae;Enterococcus |
| JQ186016 | uncultured bacterium | Bacteria;Proteobacteria;Gammaproteobacteria;Burkholderiales;Alcaligenaceae;uncultured |
| LC269914 | uncultured Alteromonas sp. | Bacteria;Proteobacteria;Gammaproteobacteria;Enterobacterales;Alteromonadaceae;uncultured |
| FPLM01008133 | metagenome | Bacteria;Actinobacteriota;Actinobacteria;Micrococcales;Intrasporangiaceae;uncultured |
| CXRK01001744 | human gut metagenome | Bacteria;Firmicutes;Bacilli;Lactobacillales;Enterococcaceae;Enterococcus |
| AMRX01000001 | Gayadomonas joobiniege G7 | Bacteria;Proteobacteria;Gammaproteobacteria;Enterobacterales;Alteromonadaceae;Gayadomonas |

**Supplementary Text Stxt4:** Rationale to develop the macro.

1. Import and align: the first step imports the query sequences in the LTPlus database using the ARB software, and aligns them using the SINA program (Pruese et al., 2012). The dataset is restricted to < 10,000 sequences in the online server to optimize the server computing capacity, and the optimal tree topology. Note that if the number of sequences is very large, some branches could be overpopulated and distort the tree analysis. Therefore, we recommend restricting the number of query entries in order not to lose resolution. The file to be imported using the macros on your own computer or in the virtual box should be named INPUT and should be saved as simple text (INPUT.txt). Otherwise, if you use the OPUcheck server any txt or fasta file can be uploaded. The sequences are imported into the LTPlus database, and a selection (**OTUs_imported**) is created. The sequences are imported into the SINA aligner implemented in the ARB program package and aligned using the PTserver created with the latest version of the LTPlus. Given that not all sequences are suitable for the alignment, the program may discard some of them (too short or unalignable), and in the selection section we also create a new one only for the aligned sequences (**OTUs_aligned**).
2. Inserting sequences in a tree using parsimony: After the sequences are aligned, these are inserted into the preexisting tree_LTPlus using the default filters available in the database. First, the LTPlus main tree is copied as a template for sequence insertion with the name “**tree_insert**”. After the tree has been created, the sequences are imported using the ARB parsimony insertion tool implemented in the program package using the filters: (i) **termini** that removes all flanking nucleotides downstream the position 5’ or upstream position 3’ of the gene, and (ii) **gap_95_q0_to_q5** that removes all gaps with insertions of very low occurrence that may not be informative for the OPU approach. The sequences are inserted and remain marked.
3. Removing taxonomies: once the sequences have been inserted into the preexisting tree, the tree is copied and named as “**tree_inserts_destroy_groups**”, then, all preexisting grouping (i.e. the curated taxonomy of the LTPlus) is removed leaving the sequences of the tree ungrouped.
4. Removing dubious sequences: to avoid noise derived from sequences with putative sequencing errors or incorrectly paired, the macro makes an initial branch analysis to recognize sequences that due to their length may not be correct, to remove followed by a reinsertion into the tree to perhaps place them in a different and more accurate position. To this, the “**tree_inserts_destroy_groups**” is copied as “**tree_inserts_long_branch_removal**” and is submitted to a branch analysis. As default parameters we use “Min rel diff %: 75” and “Min abs diff: 7.1e-2”. Once the sequences have been identified and marked, these are collected in a selection named “**OTUs_long_branch_removal**”.
5. Clustering and removal of ungrouped sequences: Once the long branch sequences are reinserted, the macro performs the analysis using the “Detect homologous clusters” tool of the Neighbor Joining program implemented in the package and that allows clustering based on internal relative sequence distances at 2%, 4%, 6%, 8%, 10%, 12% and 14%, and each cluster is named as a different OPU with a different number. Our default parameters were using a minimum distance of 2 and minimum number of sequences of 2, the name of the clusters will be OPU, the suffix %d%D and the separator “_”. Once the clustering is finished, the macro makes another branch analysis, removes long branches and updates the selection “**OTUs_long_branch_removal**”. Then, the program searches for ungrouped singletons at any of the analyzed distances (i.e. sequences that do not belong to any cluster ≤14%, therefore appear as ungrouped singletons in the tree) and removes them. The sequences removed from the tree are reinserted using the same parameters as above and the analysis repeated to ensure their lack of adequacy. The program makes a selection with all removed sequences (i.e. singletons and long branches) with the name “**OTUs_non_grouped_removal**”. Normally, as it can be read in the analyses done in table ST4 (see below), the number of removed sequences is <10% and in general look either non-rRNA gene sequences or of very bad quality. However, some good, but unaffiliated sequences could appear in the group, and a manual supervision of their quality is recommended.

Example of inadequate aligned and bad aligned Pacbio sequences (Biada et al., ) sea Rabbit gut microbiome.


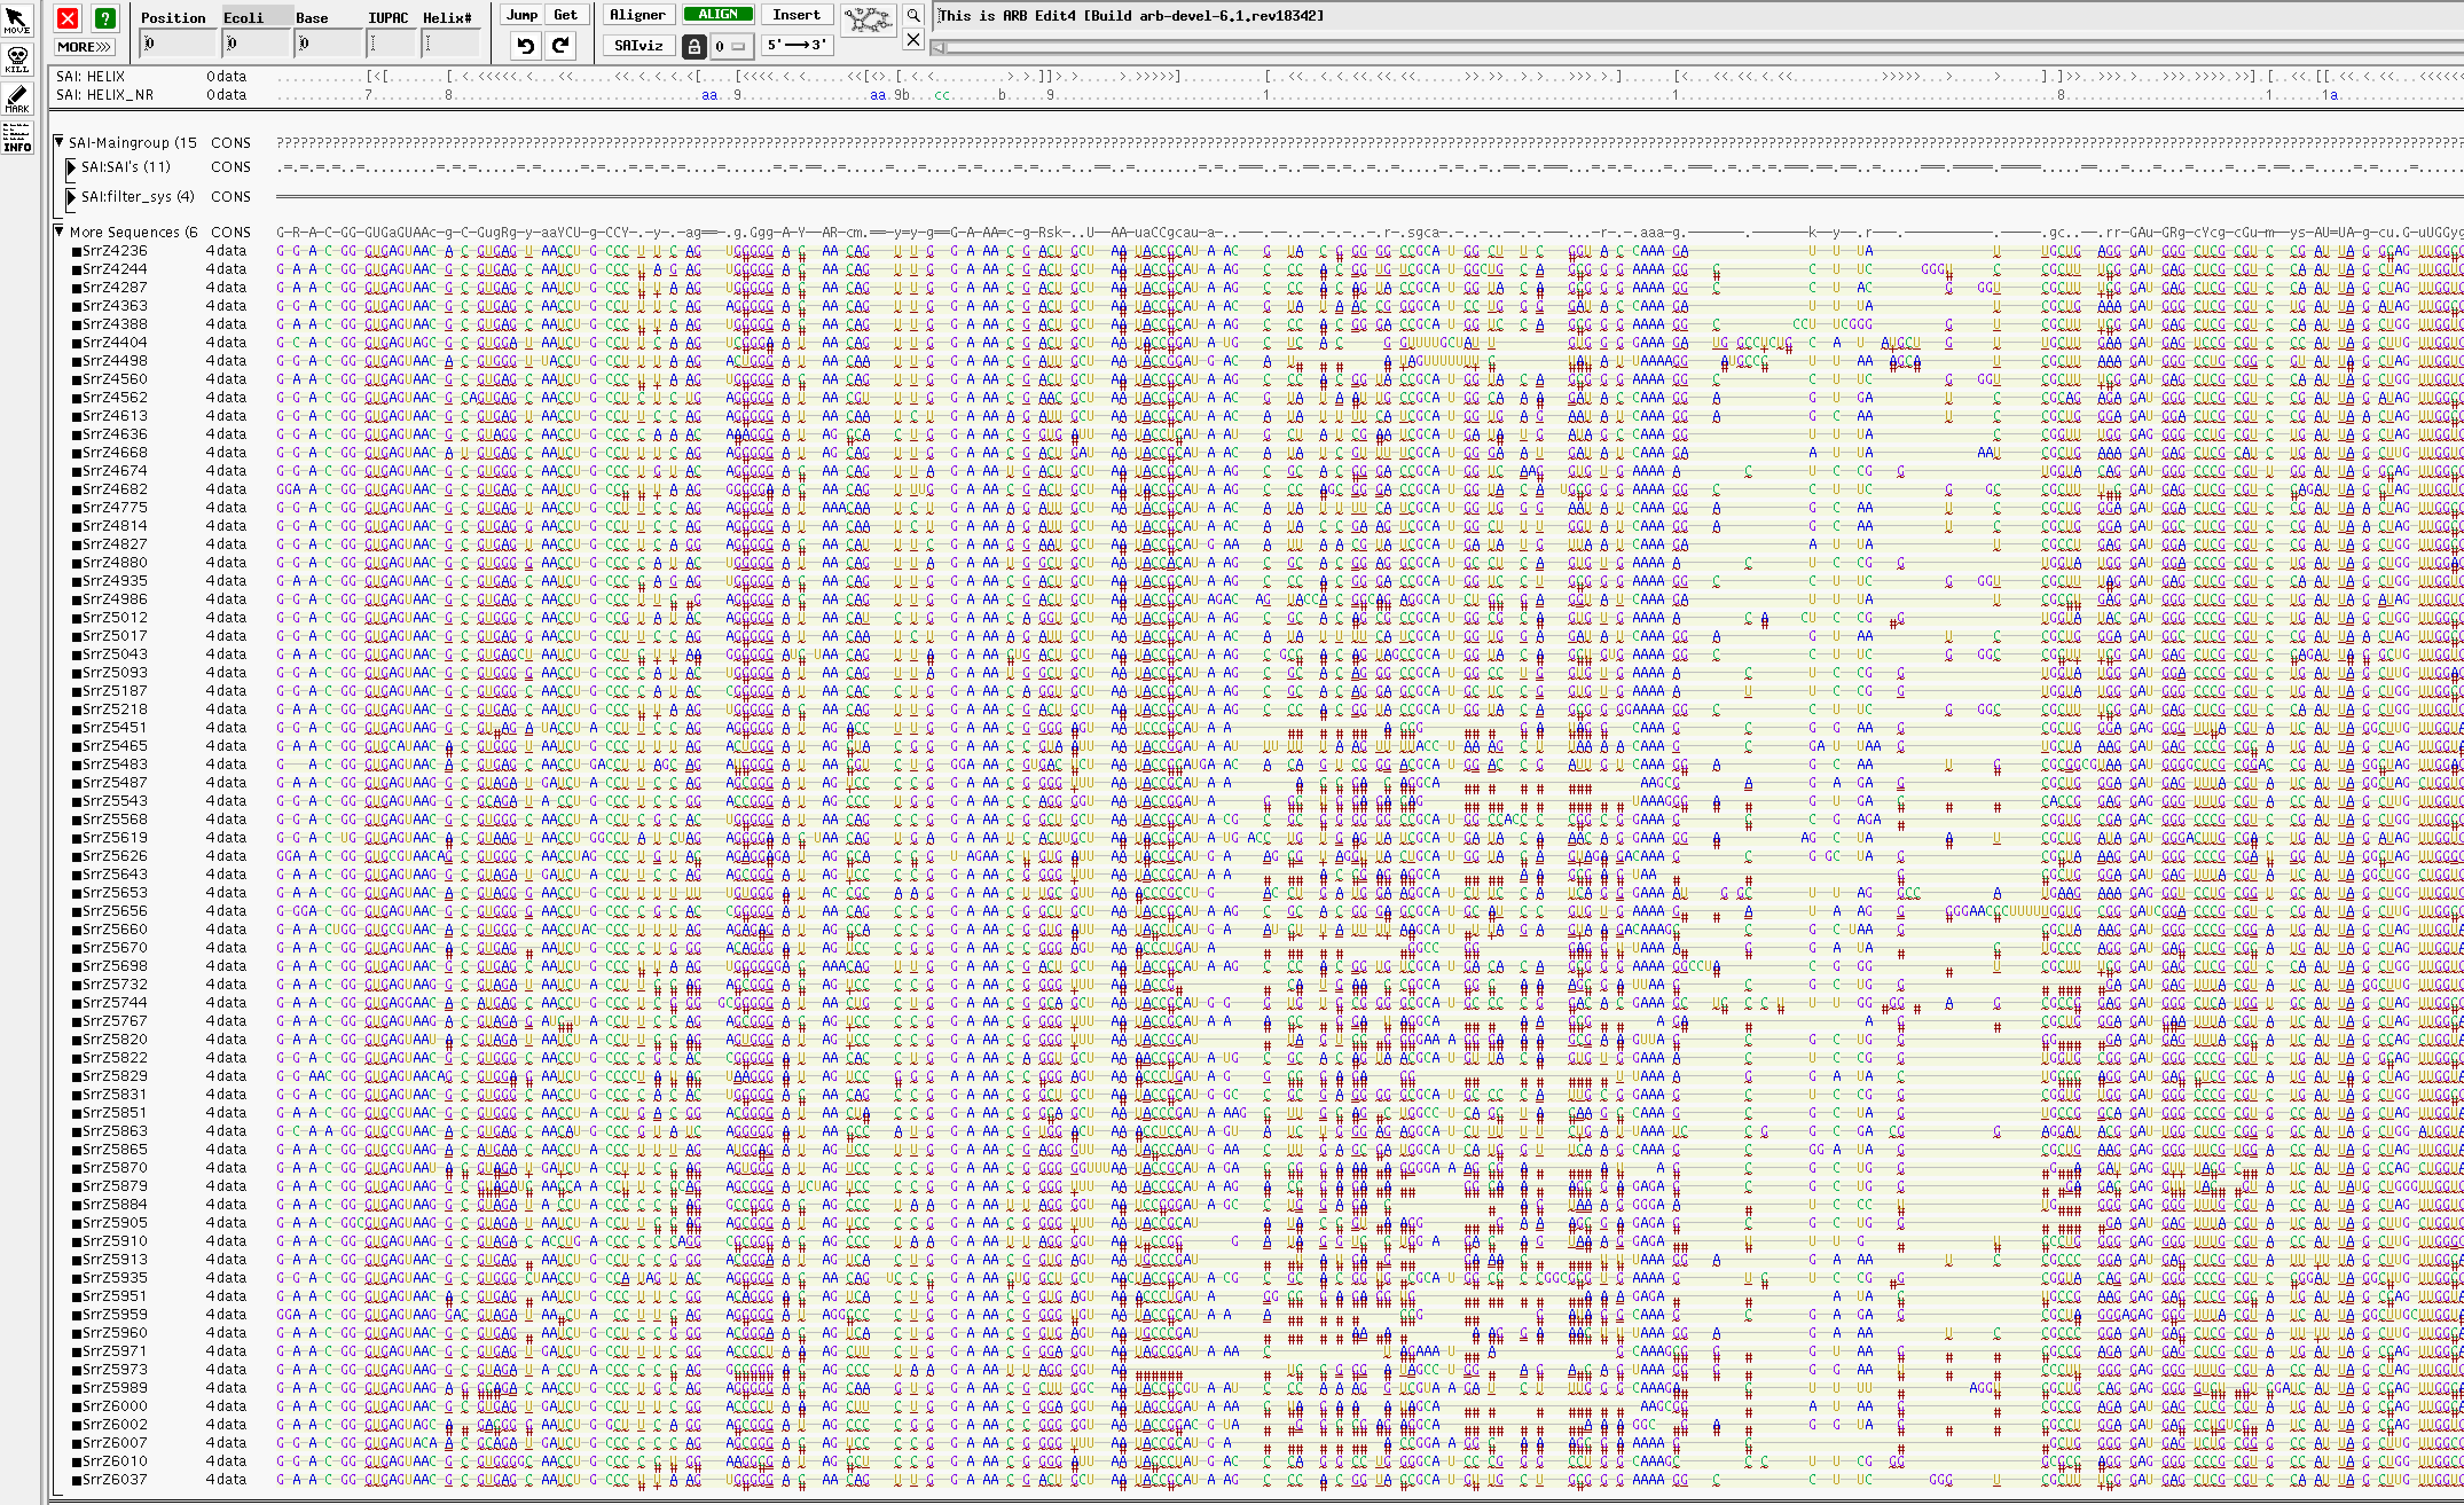


1. Renaming OPUs: All OPUs containing OTU sequences are selected for the different relative distances and renamed as OPU_X where X is the internal distance percentage in clustering (2% to 14%). Finally, all OPUs within each distance category are numbered as OPU_X~yyy, being yyy a number starting from 1 to the total number of OPUs detected. Numbering starts at the bottom of the tree, numbering upwards. For example, OPU_4~13 would mean that is the OPU 13 of the clustered at 4% relative distance.
2. Exporting results: the final step is the export of the data. To this purpose, the resulting OUTPUT_FILE.arb database is accompanied with 7 different CSV files in txt format and the columns separated with tabulator. In all files, the order of the **ARB fields** exported are: the full_name (i.e. the OTU given name); taxonomy(1) (i.e. the smallest taxonomic group comprising the OTU sequences, in general the smallest OPU); acc (i.e. the accession number of the sequences, only relevant for the reference sequences of the LTPlus as the imported sequences will receive a random number); taxonomy(1111) (i.e. the full taxonomy from domain to genus separated by /); fullname_ltp (i.e. the correct names in the LTPlus corresponding to the type strains of known species, if there is a name, means that the reference sequence is a type strain; and type_LTP (i.e. the type species all genera selected will have “type sp.” given in this column).

The files exported are the following:

1. KEPT_TAXONOMY.txt: containing all OTU representatives kept with the full taxonomy in where the sequences affiliate based on the LTPlus genealogy.
2. KEPT_OPUS.txt: containing all OTU representatives kept with the full OPU hierarchy in where the sequences affiliate.
3. UNGROUPED_12_14_TAXONOMY.txt: containing the OTU representatives that after destroying the OPUs grouped at 12% and 14% appear ungrouped, with the full taxonomy in where the sequences affiliate based on the LTPlus genealogy.
4. DISCARDED_TAXONOMY.txt: containing all OTUs removed given their either long branch affiliation or singleton nature.
5. REFERENCE_OPUS: containing all reference sequences that had been clustered with OTU sequences at a maximum of 2% internal distance with the full OPU hierarchy in where the sequences affiliate. These sequences indicate that the OTUs are probably members of the species (if only one type strain is included) and true members of the genus.
6. REFERENCE_TAXONOMY.txt: containing all reference sequences that had been clustered with OTU sequences at a maximum of 2% internal distance with the full taxonomy in where the sequences affiliate based on the LTPlus genealogy.
7. PUTATIVE_EUKARYA.txt: containing all sequences that affiliate outside the domains Bacteria and Archaea, and given that were not removed when aligning or when analyzing the branch lengths, these are putative eukaryote sequences that were unspecifically amplified.
8. TABLE_KEPT.txt: contains the summarized results compiling the OPU identity and taxonomy of the kept OTUs in the study. This is the file that may be used for the diversity analyses.
9. OUTPUT_FILE.arb: is the ARB file containing the LTPlus with the aligned and inserted query sequences, along with the trees and selections that allow data analysis.
10. OUTPUT_FILE.ARF: an accompanying file to the .arb files that can be discarded.

**Supplementary References:**

1. Anderson, M.A.J. et al. Unlocking river biofilm microbial diversity: a comparative analysis of sequencing technologies. Mol. Ecol. Res. 26, e70075. 1 of 12. (2026) <https://doi.org/10.1111/1755-0998.70075>
2. Biada, I. et al. Comparative analysis of Illumina, PacBio, and nanopore for 16S rRNA gene sequencing of rabbit’s gut microbiota. Front. Microbiomes. 4, 1587712. (2025) <https://doi.org/10.3389/frmbi.2025.1587712>
3. Buetas, E. et al. Full-length 16S rRNA gene sequencing by PacBio improves taxonomic resolution in human microbiome samples. BMC Genomics 25, 310. (2024) <https://doi.org/10.1186/s12864-024-10213-5>
4. Bustos-Caparros, E. et al. Ecological success of extreme halophiles subjected to recurrent osmotic disturbances is primarily driven by congeneric species replacement. ISME J. 18, wrae215. (2024) <https://doi.org/10.1093/ismejo/wrae215>
5. Curry, K.D., et al. Emu: Species-level microbial community profiling for full-length Nanopore 16S reads. Nat. Methods. 19, 845-853. (2022) <https://www.nature.com/articles/s41592-022-01520-4>
6. Font-Verdera, F. et al. Inverted microbial community stratification and spatial–temporal stability in hypersaline anaerobic sediments from the S’Avall solar salterns. Syst. Appl. Microbiol. 44, 126231 (2021) <https://doi.org/10.1016/j.syapm.2021.126231>
7. Gago, J.F. et al. Metagenomics of two aquifers with thermal anomalies in Mallorca Island, and proposal of new uncultivated taxa named following the rules of SeqCode. Syst. Appl. Microbiol. 47, 126506 (2024) <https://doi.org/10.1016/j.syapm.2024.126506>
8. Glasl, B., et al. Co-occurring nitrifying symbiont lineages are vertically inherited and widespread in marine sponges, The ISME Journal, 18, wrae069 (2024) <https://doi.org/10.1093/ismejo/wrae069>
9. Heritier-Robbins, P. et al. Beach sand oil spills select for generalist microbial populations, ISME Journal, 15, 3418–3422 (2021) <https://doi.org/10.1038/s41396-021-01017-6>
10. Ivulic, D. et al. Litter Management Strategies and Their Impact on the Environmental and Respiratory Microbiome Might Influence Health in Poultry. Microorganisms. 10, 878. (2022) <https://doi.org/10.3390/microorganisms10050878>
11. Maritan, A.J. Sea cucumber grazing linked to enrichment of anaerobic microbial metabolisms in coral reef sediments. The ISME Journal 19, wraf088 (2025) <https://doi.org/10.1093/ismejo/wraf088>
12. Miksch, S. et al. Bacterial communities in temperate and polar coastal sands are seasonally stable. ISME Comms. 1, 29 (2021) <https://doi.org/10.1038/s43705-021-00028-w>
13. Pruesse, E., Peplies, J., & Glöckner, F. O. SINA: Accurate high throughput multiple sequence alignment of ribosomal RNA genes. Bioinformatics, 28, 1823–1829. (2012) <https://doi.org/10.1093/bioinformatics/bts252>
14. Pomar, C.A. et al. Western diet strongly influences gut microbiomes in nursing rat dams but translates modest long-term consequences to offspring modulated by leptin supplementation during suckling. Food Frontiers. 5, 108–129. (2023) <https://doi.org/10.1002/fft2.322>
15. Veselovsky, V. et al. Comparative evaluation of sequencing platforms: Pacific Biosciences, Oxford Nanopore Technologies, and Illumina for 16S rRNA-based soil microbiome profiling. Front. Microbiol. 16, 1633360. (2025) <https://doi.org/10.3389/fmicb.2025.1633360>
16. Viver, T. et al. Food determines ephemerous and non-stable gut microbiome communities in juvenile wild and farmed Mediterranean fish. Science of the Total Environment 889, 164080 (2023) <https://doi.org/10.1016/j.scitotenv.2023.164080>
